# Supplementary material for: Actin-Related Protein Arp6 Influences H2A.Z-Dependent and -Independent Gene Expression and Links Ribosomal Protein Genes to Nuclear Pores
Source: PLoS Genet. 2010 Apr 15;6(4):e1000910. doi: 10.1371/journal.pgen.1000910 (PMC2855322; doi:10.1371/journal.pgen.1000910)
Supplement: Table S2 — Microarray analysis in arp6Δ and swr1Δ cells. (1.10 MB XLS) [file pgen.1000910.s012.xls]

## Sheet: Sheet1
Supplemantary	Table S2
	arp6 log2 ratio	arp6 t-test p-value	swr1 log2 ratio	swr1 t-test p-value
YAL001C	-0.487787	0.0551211	-0.651384	0.00964129	TFC3	transcription factor tau (TFIIIC) subunit 138
YAL002W	-0.501376	0.02013	0.465584	0.134286	VPS8	Vps8p is a membrane-associated hydrophilic protein which contains a C-terminal cysteine-rich region that conforms to the H2 variant of the RING finger Zn2+ binding motif.
YAL003W	0.291356	0.578283	0.0180634	0.741564	EFB1	Translation elongation factor EF-1beta, GDP/GTP exchange factor for Tef1p/Tef2p
YAL004W	-1.37472	0.0232235	0.446599	0.0947493		strong similarity to A.klebsiana glutamate dehydrogenase
YAL007C	0.514959	0.367907	0.193499	0.126415	ERP2	p24 protein involved in membrane trafficking
YAL008W	-1.07248	0.00390237	0.0487765	0.757249	FUN14	hypothetical protein
YAL009W	-0.838866	0.0395871	-0.00731872	0.898105	SPO7	sporulation protein
YAL010C	0.350119	0.0797372	-0.110611	0.32107	MDM10	Mitochondrial outer membrane protein involved in mitochondrial morphology and inheritance
YAL011W	-0.342594	0.310844	-0.299325	0.153161		possible mitochondrial transit peptide/weak similarity to Mus musculus p53-associated cellular protein
YAL012W	1.57324	0.0349458	0.519383	0.240288	CYS3	cystathionine gamma-lyase
YAL013W	0.105936	0.260658	0.28887	0.318643	DEP1	regulation of phospholipid metabolism
YAL014C	0.190904	0.569459	0.169774	0.044229		hypothetical protein
YAL015C	0.370542	0.0312765	-0.245836	0.00456184	NTG1	DNA glycosylase
YAL016W	-0.649753	0.0560383	0.0366356	0.638828	TPD3	protein phosphatase 2A regulatory subunit A
YAL017W	-1.2583	0.0045188	0.126513	0.38324	FUN31	Serine/threonine kinase
YAL018C	-0.510516	0.164933	-0.264509	0.317542		3 transmembrane domains/weak similarity to hypothetical proteins YOL047c and YOL048c
YAL019W	0.320792	0.444494	-0.211821	0.280255	FUN30	SNF2 protein family
YAL021C	-0.107436	0.778045	-0.00879049	0.798168	CCR4	95 kDa containng leucine rich tandem repeats
YAL022C	0.656687	0.00136424	0.428925	0.115625	FUN26	predicted membrane protein
YAL023C	0.778388	0.117515	0.530489	0.106271	PMT2	dolichyl phosphate-D-mannose:protein O-D-mannosyltransferase
YAL024C	0.327597	0.491316	0.0657922	0.797949	LTE1	putative GTP-exchange protein
YAL025C	1.74273	0.00547543	-0.503643	0.197142	MAK16	putative nuclear protein
YAL026C	-0.152252	0.144316	0.0627762	0.62495	DRS2	Membrane-spanning Ca-ATPase (P-type),member of the cation transport (E1-E2) ATPases
YAL027W	-0.193102	0.233255	-0.364863	0.173323		hypothetical protein
YAL028W	-1.05822	0.0283126	-0.125865	0.263147		similarity to hypothetical protein YOR324c
YAL029C	1.41487	0.169872	0.173406	0.142325	MYO4	myosin
YAL030W	-0.827245	0.0372235	0.300701	0.135946	SNC1	homolog of Snc2p, vesicle-associated membrane protein (synaptobrevin) homolog, forms a complex with Snc2p and Sec9p
YAL031C	-0.660932	0.00193214	0.0915975	0.555114	FUN21	FUN21
YAL032C	-0.459849	0.100362	0.119635	0.268454	PRP45	pre-mRNA splicing factor
YAL033W	0.516623	0.0851193	-0.332318	0.107723	POP5	An integral subunit of RNase P and apparent subunit of RNase MRP
YAL034C	-1.37859	0.00917457	0.462427	0.0338874	FUN19	Function unknown now
YAL034W-A	0.0460569	0.601311	-0.173771	0.501575	MTW1	determining metaphase spindle length
YAL035C-A	0.455897	0.408338	0.428415	0.170296
YAL035W	0.754387	0.0459923	-0.22136	0.0545141	FUN12	97 kDa protein
YAL036C	1.23911	0.0486981	0.0638061	0.171197	FUN11	similar to Xenopus GTP-binding protein DRG
YAL037W	-0.576456	0.00992223	-0.165687	0.532682		strong similarity to GTP-binding proteins
YAL038W	0.891294	0.223804	0.838341	0.122662	CDC19	Pyruvate kinase
YAL039C	0.367285	0.377663	0.193111	0.480239	CYC3	cytochrome c heme lyase (CCHL)
YAL040C	-0.194825	0.251202	0.567159	0.138151	CLN3	G(sub)1 cyclin
YAL041W	0.121679	0.62312	0.00106453	0.995447	CDC24	Guanine nucleotide exchange factor (a.k.a. GDP-release factor) for cdc42
YAL042W	0.520759	0.112443	0.121089	0.106201	ERV46	ER-Golgi transport vesicle protein
YAL043C	-0.0994052	0.785189	0.642208	0.0634357	PTA1	pre-tRNA processing
YAL043C-A	0.36473	0.47139	0.11843	0.175428
YAL044C	1.22689	0.21391	0.359553	0.125673	GCV3	H-protein subunit of the glycine cleavage system
YAL045C	-0.156403	0.262645	0.601852	0.0702094		hypothetical protein
YAL047C	-0.194496	0.679225	-0.488173	0.134349	SPC72	component of spindle pole bodies
YAL048C	-0.535088	0.0503099	0.08325	0.159664	PEP4	vacuolar aspartic proteasse
YAL049C	-1.58912	0.000295413	0.155651	0.320493		weak similarity to Legionella small basic protein sbpA
YAL053W	1.16722	0.232726	0.494265	0.182351		strong similarity to hypothetical proteins YOR365c,YGL139w,YPL221w
YAL054C	-1.09564	0.0245459	0.2452	0.445282	ACS1	inducible acetyl-coenzyme A synthetase
YAL055W	-1.18899	0.00485353	-0.410131	0.0741313	PEX22	peroxisomal matrix protein import
YAL058C-A	0.154682	0.736803	0.43489	0.0383012
YAL058W	-0.316638	0.0121901	0.124089	0.0850059	CNE1	Calnexin and calreticulin homolog
YAL059W	1.18909	0.105757	-0.368382	0.180043	ECM1	putative transmembrane domain protein involved in cell wall biogenesis
YAL060W	-0.332573	0.461367	0.208542	0.39881	FUN49	stereospecific (2R, 3R)-2,3-butanediol dehydrogenase
YAL061W	-1.76292	0.0141355	0.322908	0.261242	FUN50	similarity to alcohol/sorbitol dehydrogenase
YAL062W	-1.71445	0.00682986	0.0568244	0.427171	GDH3	NADP-linked glutamate dehydrogenase
YAL064C-A	-0.178657	0.740798	0.233635	0.382026		strong similarity to Flo1p, Flo5p - putative pseudogene
YAL064W	-0.745059	0.145379	0.28682	0.453966		hypothetical protein
YAL065C	-1.17547	0.0038271	0.399871	0.0818402		strong similarity to Flo1p and Flo9p - putative pseudogene
YAL066W	-0.934082	0.296858	-0.00523804	0.993169		weak similarity to membrane protein yybF - Bacillus subtilis
YAL067C	-1.25125	0.0395956	-0.0664982	0.541023	SEO1	putative permease/Suppressor of Sulfoxyde Ethionine resistance
YAL069W	-0.147237	0.771201	0.404281	0.099212
YAR002C-A	0.808926	0.34975	0.258873	0.277899	ERP1	p24 protein involved in membrane trafficking
YAR002W	1.03607	0.00537799	-0.125111	0.316509	NUP60	nuclear pore protein
YAR003W	-0.211578	0.28612	-0.439692	0.0288549	FUN16	beta transducin domain/similarity to human RB protein binding protein
YAR007C	0.630607	0.128061	0.193886	0.236506	RFA1	69 kDa subunit of the heterotrimeric RPA (RF-A) single-stranded DNA binding protein, binds URS1 and CAR1
YAR008W	0.531615	0.2496	0.00732081	0.966486	SEN34	34kDa subunit of the tetrameric tRNA splicing endonuclease
YAR009C	1.56899	0.0488452	0.323389	0.0270248	TY1B	Ty1B protein
YAR010C	1.44033	0.0671135	0.455664	0.00996717	TY1A	TY1A protein
YAR014C	0.687659	0.0609456	-0.116161	0.246966	BUD14	maximal growth/similarity to hypothetical protein S.pombe
YAR015W	1.02825	0.280429	-0.0636729	0.498936	ADE1	phosphoribosyl amino imidazolesuccinocarbozamide synthetase
YAR018C	0.244946	0.506543	0.208884	0.000210337	KIN3	protein kinase
YAR019C	-0.177928	0.554621	0.344763	0.20201	CDC15	protein kinase domain
YAR020C	0.150018	0.566814	0.644598	0.0182347	PAU7	similar to Pau3, member of Pau1 family
YAR023C	-0.639983	0.0611651	0.0115217	0.926461		membrane protein
YAR027W	-0.697101	0.111521	-0.196597	0.124442	FUN55	membrane protein/strong similarity to YAR028w, YCR007c, YGL053w, YAR031w, FUN59p and YGL051w
YAR028W	0.0243846	0.965511	0.0186706	0.788749		membrane protein/strong similarity to Fun55p, YGL053w, YCR007c, YAR031w, Fun59p and YGL051w
YAR030C	0.304108	0.377812	0.0371103	0.897035		hypothetical protein
YAR031W	-0.608919	0.0231343	-0.0598128	0.680637	PRM9	membrane protein/strong similarity to YGL053w, Fun59p, YGL051w, Fun55p, YAR028w and YCR007c
YAR033W	-0.529638	0.157688	-0.0303865	0.852864	FUN59	membrane protein/strong similarity to YGL051w, YGL053w, YAR031w, Fun55p, YAR028w and YCR007c
YAR035W	-0.0718029	0.912505	-0.0884235	0.289351	YAT1	Outer carnitine acetyltransferase, mitochondrial
YAR042W	-0.0300614	0.92488	0.283718	0.419166	SWH1	ankyrin repeat
YAR044W	-0.00263468	0.994132	-0.0543743	0.653312	OSH1	Shows homology to the human oxysterol binding protein (OSBP)
YAR047C	-0.863873	0.264808	-0.457303	0.43518		predicted nuclear targeting signal
YAR053W	-0.58802	0.172781	0.483606	0.30726		predicted membrane protein
YAR060C	0.132593	0.858685	0.0774829	0.674931		strong similarity to hypothetical protein YHR212c
YAR061W	-0.492174	0.264261	-7.98871e-05	0.999789		strong similarity to N-terminus of Flo1p - putative pseudogene
YAR062W	-0.167683	0.455152	0.565555	0.0706999		strong similarity to Flo1p - putative pseudogene
YAR064W	0.0758413	0.848648	0.192771	0.405714		Potential membrane protein
YAR066W	0.700203	0.213023	0.412288	0.060146		identical to YHR214w hypothetical protein, similarity to Sta1p
YAR068W	0.245011	0.505027	0.479488	0.125501		Potential membrane protein
YAR069C	-0.746963	0.0591787	1.06223	0.0748235		Potential membrane protein
YAR070C	-0.0554497	0.578769	-0.202658	0.753175		potential mitochondrial transit peptide
YAR071W	-0.249931	0.65784	0.242156	0.0476332	PHO11	Acid phosphatase, secreted
YAR073W	0.808656	0.198473	-0.391364	0.0120982	IMD1	IMP dehydrogenase homolog
YAR075W	1.35008	0.0421463	0.285654	0.110292		strong similarity to IMP dehydrogenases
YBL001C	0.521372	0.0631502	0.377807	0.00799523	ECM15	involved in cell wall biogenesis
YBL002W	0.644047	0.112478	0.436611	0.0507959	HTB2	Histone H2B (HTB1 and HTB2 code for nearly identical proteins)
YBL005W-A	0.711706	0.0666311	0.397035	0.0294993		TyA gag protein. Gag processing produces capsid proteins.
YBL005W-B	0.806695	0.00427047	0.441843	0.0996695		The TyB Gag-Pol protein. Gag processing produces capsid proteins. Pol is cleaved to produce protease, reverse transcriptase, and integrase activities.
YBL007C	-1.05476	0.0112073	0.585806	0.0606365	SLA1	contains 3 SH3 domains, interacts with Bee1p
YBL008W	-0.257135	0.395844	-0.291905	0.0824161	HIR1	putative repressor protein homologous to yeast Tup1p and mammalian retinal transducin ; contains nuclear targeting signal
YBL009W	0.377904	0.4102	-0.139776	0.535123		strong similarity to DNA damage responsive Alk1p
YBL011W	0.732696	0.0299915	0.0831029	0.483247	SCT1	suppressor of choline-transport mutants
YBL012C	0.122002	0.818084	0.501229	0.245672		questionable ORF
YBL013W	-0.545519	0.247361	-0.131202	0.688835	FMT1	Methionyl-tRNA Transformylase
YBL014C	0.145228	0.439522	-0.259788	0.10834	RRN6	member of yeast Pol I core factor (CF) also composed of Rrn11p, Rrn7p and TATA-binding protein
YBL015W	-1.88888	0.0117571	-0.0897912	0.38036	ACH1	acetyl CoA hydrolase
YBL016W	0.405386	0.154177	0.286881	0.207832	FUS3	cdc2+ /CDC28 related kinase with positive role in conjugation
YBL017C	-0.350574	0.00957813	0.117031	0.552092	PEP1	carboxypeptidase Y sorting receptor in late Golgi ; Type I integral membrane protein 166aa cytoplasmic tail, 1300 aa lumenal domain
YBL018C	0.429413	0.189626	0.0179902	0.520463	POP8	integral subunit of RNase P and apparent subunit of RNase MRP
YBL019W	-0.443609	0.193113	0.251108	0.139099	APN2	AP endonuclease
YBL020W	-0.146447	0.399903	0.129851	0.139007	RFT1	67 kDa integral membrane protein
YBL021C	0.418111	0.0944688	0.244357	0.122508	HAP3	transcriptional activator protein of CYC1
YBL022C	0.057852	0.823243	-0.158622	0.282645	PIM1	mitochondrial ATP-dependent protease
YBL023C	0.311056	0.164045	-0.1869	0.230538	MCM2	Minichromosome maintenance protein, transcription factor
YBL024W	0.768177	0.114518	-0.234638	0.0360286	NCL1	Probable proliferating-cell nucleolar antigen (human p120)
YBL025W	0.214419	0.0220391	0.00545516	0.978684	RRN10	Upstream activation factor subunit
YBL026W	0.550468	0.123593	-0.418656	0.0613043	LSM2	snRNA-associated protein of the Sm class
YBL027W	1.0769	0.044605	-0.188299	0.495993	RPL19B	Ribosomal protein L19B (YL14) (L23B) (rpl5L)
YBL028C	1.50881	0.0984548	-0.774528	0.132995		hypothetical protein - involved in mating-type regulation
YBL029W	-0.698975	0.0122828	-0.263262	0.0893007		hypothetical protein
YBL030C	-0.996933	0.0236345	0.172121	0.0830053	PET9	mitochondrial ADP /ATP translocator
YBL031W	0.234499	0.377257	-0.00817903	0.968115	SHE1	hypothetical protein
YBL032W	-0.388958	0.0459858	0.0176706	0.957997		weak similarity to hnRNP complex protein homolog YBR233w
YBL033C	0.267094	0.0715525	-0.12488	0.137727	RIB1	GTP cyclohydrolase II
YBL034C	0.923515	0.0267696	-0.020444	0.486716	STU1	component of the mitotic spindle
YBL035C	0.0545159	0.832182	0.220668	0.0987819	POL12	B subunit of DNA polymerase alpha-primase complex
YBL036C	0.203817	0.105062	-0.458968	0.0308258		Homolog to twitching motility protein (P. aeroginosa)
YBL037W	-0.509955	0.0395076	-0.13985	0.0272203	APL3	Large subunit of clathrin associated protein complex
YBL038W	0.0119032	0.969512	-0.436315	0.0616997	MRPL16	Mitochondrial ribosomal protein MRPL16
YBL039C	1.6411	0.101241	0.0749503	0.541091	URA7	CTP synthase, highly homologus to URA8 CTP synthase
YBL040C	0.414489	0.337367	0.41695	0.00386697	ERD2	encodes the HDEL receptor required for retention of ER proteins
YBL041W	0.302974	0.334707	-0.259201	0.100003	PRE7	proteasome subunit
YBL042C	1.54901	0.235517	0.314683	0.192858	FUI1	uridine permease
YBL043W	0.858385	0.0428885	-0.77841	0.0366569	ECM13	(putative) involved in cell wall biogenesis
YBL044W	-0.195693	0.623648	-0.729946	0.191345		hypothetical protein
YBL045C	-0.792871	0.00625502	0.176389	0.299818	COR1	44 kDa core protein of yeast coenzyme QH2 cytochrome c reductase
YBL046W	0.385961	0.0816641	-0.350887	0.132967		weak similarity to hypothetical protein YOR054c
YBL048W	-1.69306	0.00106438	0.178309	0.672635		hypothetical protein
YBL049W	-1.6952	0.00337639	-0.00809203	0.984683		strong similarity to hypothetical protein - human
YBL050W	-0.413918	0.141981	-0.196815	0.0786723	SEC17	peripheral membrane protein required for vesicular transport between ER and Golgi
YBL051C	0.401509	0.181824	0.222848	4.561e-05		hypothetical protein
YBL052C	0.269763	0.0904959	-0.752253	0.0128984	SAS3	involved in silencing at HMR
YBL053W	0.0442553	0.911991	0.139376	0.707387		questionable ORF
YBL054W	1.30792	0.023417	0.2049	0.153605		Homolog to myb transforming proteins
YBL055C	0.358491	0.481933	-0.250402	0.0704871		similarity to hypothetical S.pombe protein
YBL056W	-0.286587	0.173469	-0.273954	0.0426565	PTC3	protein phosphatase type 2C
YBL057C	-0.32078	0.40663	-0.0463343	0.444339		strong similarity to hypothetical S.pombe protein
YBL058W	-0.379625	0.217952	-0.078208	0.41877	SHP1	putative regulatory subunit for Glc7p, a phosphatase required for glucose repression
YBL059W	0.462211	0.198916	-0.105542	0.378786		weak similarity to hypothetical protein YER093c-a
YBL060W	0.0770035	0.582507	-0.474269	0.0264069		has homology to the sec7 domain of gtp exchange factors
YBL061C	0.648278	0.0336927	0.000146021	0.999336	SKT5	Probable Ca++ binding membrane protein (prenylated)
YBL062W	0.579637	0.0335507	-0.196913	0.00830833		questionable ORF
YBL063W	0.525578	0.275714	0.208609	0.330501	KIP1	kinesin related protein
YBL064C	-1.18003	0.00871381	-0.0127579	0.959223		similar to thiol-specific antioxidant enzymes such as rehydrin /peroxiredoxin
YBL065W	-0.84949	0.108916	-0.191671	0.466324		questionable ORF
YBL066C	-0.694226	0.143849	0.262468	0.257366	SEF1	putative transcription factor
YBL067C	-0.511858	0.0523223	-0.525739	0.149093	UBP13	ubiquitin carboxyl-terminal hydrolase
YBL068W	0.552261	0.0191799	0.0137443	0.745293	PRS4	ribose-phosphate pyrophosphokinase 4
YBL069W	-0.00725388	0.987733	-0.0251294	0.83042	AST1	involved in targeting of plasma membrane [H+]ATPase
YBL070C	0.478395	0.258147	1.44953	0.218832		questionable ORF
YBL071C	1.6651	0.00226826	0.397246	0.00519429		hypothetical protein
YBL072C	2.20257	0.0676283	0.170423	0.317507	RPS8A	Ribosomal protein S8A (S14A) (rp19) (YS9)
YBL073W	-0.405224	0.129399	-0.621781	0.118043		questionable ORF
YBL074C	-0.514569	0.0442402	-0.29934	0.200705	AAR2	MATa1-mRNA splicing factor
YBL075C	-1.40272	0.0380219	0.103765	0.516249	SSA3	heat-inducible cytosolic member of the 70 kDa heat shock protein family
YBL076C	0.581969	0.0961794	0.0353198	0.616663	ILS1	cytoplasmic isoleucyl-tRNA synthetase
YBL077W	1.1727	0.0796213	0.370472	0.179126		questionable ORF
YBL078C	-0.664171	0.112692	0.015724	0.901271	AUT7	Aut7p has homology to LC3, a microtubule-associated protein from rat.
YBL079W	-0.00134744	0.994455	0.242089	0.035449	NUP170	Nucleoporin highly similar to Nup157p and to mammalian Nup155p (nup170 mutant can be complemented with NUP155)
YBL080C	-0.139818	0.418501	-0.465853	0.0733796	PET112	62-kDa protein
YBL081W	1.01711	0.195899	0.379908	0.0832877		hypothetical protein
YBL082C	0.289126	0.451855	0.462327	0.194832	RHK1	putative Dol-P-Man dependent alpha(1-3) mannosyltransferase involved in the biosynthesis of the lipid-linked oligosaccharide
YBL083C	0.619333	0.241585	0.780879	0.0440701		questionable ORF
YBL085W	0.836765	0.157705	0.163005	0.490774	BOI1	BEM1-binding protein
YBL086C	-0.010155	0.966715	-0.0439581	0.723896		involved in sugar metabolism
YBL087C	1.69105	0.0261847	0.387822	0.0477038	RPL23A	Ribosomal protein L23A (L17aA) (YL32)
YBL089W	0.155452	0.725891	0.094286	0.732266		similar to amino acid transport proteins
YBL090W	0.13093	0.447529	-0.444728	0.137346	MRP21	Component of the small subunit of mitochondrial ribosomes
YBL091C	-0.0159209	0.92853	0.0711118	0.0230033	MAP2	methionine aminopeptidase 2
YBL092W	1.35968	0.0899998	0.242349	0.222788	RPL32	Ribosomal protein L32
YBL093C	1.63054	0.0664459	-0.409841	0.216686	ROX3	RNA polymerase II holoenzyme /mediator subunit
YBL094C	0.152904	0.51561	0.109011	0.180971		questionable ORF
YBL095W	-0.590805	0.00492726	-0.0296337	0.812978		similarity to C.albicans hypothetical protein
YBL096C	0.809339	0.0293561	0.232939	0.416154		questionable ORF
YBL097W	0.770434	0.0736883	-0.361063	0.146008	BRN1	involved in chromosome maintenance ; similar to Drosophila barren, Xenopus XCAP-H, and human BRRN1
YBL098W	0.0973033	0.636822	-0.29757	0.0749393		similar to kynurenine 3-monoxygenase
YBL099W	-1.74485	0.000944171	0.178293	0.304698	ATP1	mitochondrial F1F0-ATPase alpha subunit
YBL100C	-0.95817	0.163043	-0.229258	0.056341
YBL101C	-1.01527	0.0199621	0.0674256	0.379628	ECM21	involved in cell wall biogenesis
YBL101W-A	-0.00154932	0.996505	0.0571474	0.689363		TyA gag protein. Gag processing produces capsid proteins.
YBL102W	-0.0802853	0.556078	0.310929	0.159417	SFT2	similar to mammalian syntaxin 5
YBL103C	0.9323	0.0887184	-0.176096	0.262862	RTG3	Probable cytochrome c subunit, copper binding
YBL104C	-0.297158	0.219171	0.0197583	0.843114		weak similarity to S.pombe hypothetical protein SPAC12G12.01c
YBL105C	-0.293372	0.173609	0.261086	0.115318	PKC1	Protein Kinase C
YBL106C	-0.478511	0.139929	0.226126	0.146578	SRO77	yeast homolog of the Drosphila tumor suppressor, lethal giant larvae
YBL107C	0.20078	0.388844	-0.74911	0.0522485		hypothetical protein
YBL111C	-1.05003	0.0214406	0.440875	0.111354		strong similarity to subtelomeric encoded proteins
YBL112C	1.1918	0.432221	0.287071	0.00690443		strong similarity to subtelomeric encoded proteins
YBR001C	-0.8655	0.0210608	-0.160508	0.395244	NTH2	Neutral trehalase, highly homologous to Nth1p
YBR002C	0.730284	0.0338733	-0.289765	0.119605	RER2	cis-prenyltransferase
YBR003W	0.10017	0.480672	-0.0630573	0.495326	COQ1	hexaprenyl pyrophosphate synthetase
YBR004C	1.29556	0.221698	0.132653	0.387742		similarity to S.pombe hypothetical protein SPAC18B11.05
YBR005W	0.924654	0.249522	0.104688	0.366763		strong similarity to hypothetical protein YDR003w
YBR006W	-1.5256	0.00895736	-0.0856693	0.671433	UGA2	succinate semialdehyde dehydrogenase
YBR007C	0.517934	0.0578294	-0.0663207	0.644968		hypothetical protein
YBR008C	-0.373762	0.0117409	0.308046	0.0892314	FLR1	Major Facilitator Transporter
YBR009C	1.79607	0.160622	-0.128226	0.647365	HHF1	Histone H4 (HHF1 and HHF2 code for identical proteins)
YBR010W	0.269848	0.520269	-0.267809	0.167146	HHT1	Histone H3 (HHT1 and HHT2 code for identical proteins)
YBR011C	0.711606	0.0942005	0.48756	0.0779066	IPP1	Inorganic pyrophosphatase
YBR012C	0.0200501	0.961741	-0.446376	0.0569504		hypothetical protein
YBR012W-A	0.92916	0.0546639	0.45874	0.0259309		TyA gag protein. Gag processing produces capsid proteins.
YBR012W-B	0.773828	0.0389811	0.425029	0.021805		The TyB Gag-Pol protein. Gag processing produces capsid proteins. Pol is cleaved to produce protease, reverse transcriptase, and integrase activities.
YBR013C	-0.149544	0.571566	-0.891617	0.176515		hypothetical protein
YBR014C	-0.410765	0.117959	-0.328502	0.223802		Glutaredoxin homolog
YBR015C	-0.296824	0.107936	0.822612	0.0180585	MNN2	putative Golgi alpha-1,2-mannosyltransferase
YBR016W	-0.253829	0.0222345	0.611212	0.0569738		strong similarity to hypothetical proteins YDL012c and YDR210w
YBR017C	0.66469	0.106855	0.25572	0.063517	KAP104	karyopherin beta 2, yeast transportin
YBR018C	-1.06276	0.0324402	0.0129977	0.872951	GAL7	galactose-1-phosphate uridyl transferase
YBR019C	-0.126045	0.238774	0.347152	0.1273	GAL10	UDP-glucose 4-epimerase
YBR020W	-0.554741	0.016211	-0.158015	0.298445	GAL1	galactokinase
YBR021W	0.954354	0.01879	0.205891	0.238396	FUR4	uracil permease
YBR022W	0.171306	0.537297	-0.349687	0.00184143		hypothetical protein
YBR023C	0.912264	0.103935	0.0986687	0.380427	CHS3	chitin synthase 3
YBR024W	-0.371808	0.185578	-0.224131	0.118991	SCO2	SCO1 protein homolog (S. cerevisiae)
YBR025C	-0.0325356	0.761317	-0.334788	0.0252593		probable purine nucleotide-binding protein
YBR026C	-1.79667	0.00113951	-0.488344	0.0110015	MRF1'	Nuclear protein that binds to T-rich strand of core consensus sequence of autonomously replicating sequence
YBR027C	-0.31314	0.383916	0.438249	0.0924456		hypothetical protein
YBR028C	-0.387958	0.0727589	-0.181174	0.043928		Probable ser /thr-specific protein kinase, homolog to YKR2 and YPK1 (S. cerevisiae)
YBR029C	1.87322	0.202566	0.43975	0.02589	CDS1	CDP-diacylglycerol synthase, CTP-phosphatidic acid cytidylyltransferase, CDP-diglyceride synthetase
YBR030W	0.316712	0.445264	0.074473	0.614229		involved in inositol biosynthesis
YBR031W	1.61354	0.075418	0.301062	0.25208	RPL4A	Ribosomal protein L4A (L2A) (rp2) (YL2)
YBR032W	1.5755	0.339952	0.793243	0.144359		hypothetical protein
YBR033W	-0.675767	0.1248	0.0985507	0.308753		Probable regulatory Zn-finger protein, / homolog to YKL251 /
YBR034C	2.22874	0.203126	-0.196495	0.0286697	HMT1	nuclear protein arginine methyltransferase (mono- and asymmetrically dimethylating enzyme)
YBR035C	0.130349	0.809217	0.13172	0.328785	PDX3	pyridoxine (pyridoxiamine) phosphate oxidase
YBR036C	0.117417	0.740689	0.410956	0.198271	CSG2	contains 9 or 10 putative membrane spanning regions ; putative Ca2+ binding protein (homology to EF-hand Ca2+ binding site)
YBR037C	-0.170675	0.570646	0.105247	0.414885	SCO1	inner mitochondrial membrane protein
YBR038W	0.305385	0.644042	0.282926	0.398128	CHS2	chitin synthase 2
YBR039W	-0.594275	0.0808605	0.0015753	0.966726	ATP3	gamma subunit of mitochondrial ATP synthase
YBR040W	-0.00766125	0.989132	0.77883	0.523132	FIG1	integral membrane protein
YBR041W	0.436473	0.314142	0.289904	0.0454648	FAT1	Fatty acid transporter
YBR042C	0.242945	0.666003	-0.20606	0.171424		Probable membrane-bound small GTPase
YBR043C	0.953943	0.42705	-0.0755217	0.353174		similarity to benomyl/methotrexate resistance protein
YBR044C	0.355155	0.565509	0.0884433	0.520231	TCM62	mitochondrial protein ; (putative) chaperone
YBR045C	-0.583754	0.209084	-0.179532	0.320474	GIP1	putative Glc7 regulatory subunit
YBR046C	-0.509004	0.0786871	-0.268806	0.196697	ZTA1	Homolog to quinone oxidoreductase (E. coli)
YBR047W	0.345132	0.214329	-0.37571	0.11985		hypothetical protein
YBR048W	0.603508	0.135602	0.102494	0.627849	RPS11B	Ribosomal protein S11B (S18B) (rp41B) (YS12)
YBR050C	-2.74261	0.00120284	-0.0119035	0.793038	REG2	putative Glc7 regulatory subunit
YBR051W	-0.799544	0.198636	0.200747	0.555529		questionable ORF
YBR052C	-0.883764	0.00881319	0.174627	0.274163		Homolog to YCR004, obr1 (S. pombe), trp repressor binding protein (E. coli)
YBR053C	-1.26196	0.00753038	0.0645682	0.696539
YBR054W	-0.824167	0.202368	0.0582532	0.867115	YRO2	Homolog to HSP30 heat shock protein YRO1 (S. cerevisiae) 7
YBR055C	0.0659047	0.474611	-0.202556	0.139191	PRP6	RNA splicing factor
YBR056W	-1.83847	0.000290729	-0.210984	0.0392386		Homolog to glucan-1,3--glucosidase (EC 3.2.1.5 ; S. cerevisiae) 2
YBR057C	0.158454	0.490281	-0.566429	0.108715	MUM2	similar to ubiquitin C-terminal hydrolase, involved in meiosis
YBR058C	-0.195941	0.322759	-0.164024	0.137951	UBP14	Ubiquitin-specific protease
YBR058C-A	0.558715	0.129197	0.109071	0.250595	TSC3	involved in sphingolipid biosynthesis
YBR059C	-0.34664	0.363023	-0.0508294	0.240663	AKL1	Serine-threonine protein kinase
YBR060C	0.279712	0.531653	-0.0451862	0.808705	ORC2	origin recognition complex subunit 2
YBR061C	0.761585	0.0249652	0.0182003	0.84636		Homolog to ftsJ protein (E. coli) , / YCR054 /
YBR062C	0.28829	0.0146327	0.143601	0.300327		similarity to rat neurodegeneration associated protein 1
YBR063C	-0.500386	0.0561471	-0.656807	0.0112832		Probable phosphopanthethein-binding protein
YBR064W	-0.345702	0.402576	0.0460604	0.886921		questionable ORF
YBR065C	-0.294073	0.363688	-0.54517	0.0836825	ECM2	(putative) involved in cell wall biogenesis and mRNA splicing
YBR066C	-0.401369	0.477443	-0.259366	0.013534	NRG2	homologue of NRG1
YBR067C	2.65729	0.08166	0.728937	0.159134	TIP1	cell wall mannoprotein
YBR068C	1.1355	0.136926	0.318766	0.082273	BAP2	probable amino acid permease for leucine, valine, and isoleucine
YBR069C	1.41987	0.0282454	0.191599	0.181834	TAT1	Amino acid transport protein for valine, leucine, isoleucine, and tyrosine
YBR070C	0.287655	0.26107	0.48858	0.0509325		involved in osmotolerance
YBR071W	-0.234041	0.135316	0.148379	0.017435		hypothetical protein
YBR072W	-3.85355	4.35429e-05	0.0552428	0.878229	HSP26	heat shock protein 26
YBR073W	0.608581	0.00112215	-0.127538	0.410415	RDH54	Putative helicase similar to RAD54
YBR074W	-0.195303	0.290335	0.128193	0.575225		Homolog to aminopeptidase Y (S. cerevisiae)
YBR075W	-0.259588	0.0910433	0.413376	0.0450789		hypothetical protein
YBR076W	1.68428	0.1931	0.559384	0.162139	ECM8	involved in cell wall biogenesis
YBR077C	0.234624	0.520607	0.0835208	0.0806293		hypothetical protein
YBR078W	0.63429	0.458226	0.744163	0.0205101	ECM33	Homolog to sporulation specific protein SPS2 (S. cerevisiae)
YBR079C	0.483314	0.0919291	-0.0200229	0.790565	RPG1	translation initiation factor eIF3
YBR080C	0.279609	0.26188	0.0545069	0.514895	SEC18	cytoplasmic protein involved in protein transport between ER and Golgi ; ATPase
YBR081C	0.015336	0.901638	-0.60217	0.0845271	SPT7	transcription factor, member of the histone acetyltransferase SAGA complex
YBR082C	0.745786	0.215734	0.458275	0.0521565	UBC4	ubiquitin-conjugating enzyme
YBR083W	0.377419	0.2345	0.371096	0.0914877	TEC1	transcription factor of the TEA /ATTS DNA-binding domain family, regulator of Ty1 expression
YBR084C-A	0.77005	0.112341	-0.104796	0.566028	RPL19A	Ribosomal protein L19A (L23A) (rpl5L) (YL14)
YBR084W	1.18806	0.0690264	-0.132719	0.233224	MIS1	mitochondrial C1-tetrahydroflate synthase
YBR085C-A	-0.459633	0.173741	-0.115549	0.121631
YBR085W	0.775536	0.315389	-0.00688205	0.972006	AAC3	mitochondrial ADP /ATP translocator
YBR086C	-0.519624	0.013228	0.514072	0.0117044	IST2	Probable transmembrane protein
YBR087W	0.366792	0.0801581	-0.203184	0.274915	RFC5	Subunit 5 of Replication Factor C ; homologous to human RFC 38 kDa subunit
YBR088C	0.582217	0.430218	0.172054	0.147877	POL30	Proliferating cell nuclear antigen
YBR089C-A	0.353168	0.00171231	-0.0521655	0.367424	NHP6B	11-kDa nonhistone chromosomal protein
YBR089W	0.502896	0.470921	-0.00422055	0.987307		questionable ORF
YBR090C-A	0.234675	0.291936	-0.135266	0.0474049	NHP6B	11-kDa nonhistone chromosomal protein
YBR091C	0.504694	0.216332	0.315298	0.0171577	MRS5	Nuclear protein involved in mitochondrial intron splicing
YBR092C	1.73644	0.129026	0.595934	0.093824	PHO3	Acid phosphatase, constitutive
YBR093C	0.0498496	0.938039	0.352209	0.0857805	PHO5	Acid phosphatase, repressible
YBR094W	-0.427225	0.162997	-0.214104	0.107077		weak similarity to pig tubulin-tyrosine ligase
YBR095C	0.00970882	0.962635	-0.725473	0.0500872		hypothetical protein
YBR096W	1.07496	0.3742	-0.152283	0.231555		hypothetical protein
YBR097W	-0.114237	0.747321	-0.037556	0.341801	VPS15	Myristoylated Serine /threonine protein kinase involved in vacuolar protein sorting
YBR098W	-0.0124099	0.973713	-0.471352	0.0100625	MMS4	putative transcriptional (co)activator for DNA damage
YBR099C	0.168036	0.814245	0.466871	0.0697773		weak similarity to T.brucei mitochondrion hypothetical protein 6
YBR100W	0.00873152	0.990177	0.317328	0.408715		questionable ORF
YBR101C	0.24846	0.41373	-0.142347	0.261544		weak similarity to S.pombe hypothetical protein SPBC3B9.01
YBR102C	-0.170839	0.592619	-0.456776	0.0758612	EXO84	Component of the exocyst complex ; homolog in rat brain called rExo84.
YBR103W	-0.0855285	0.629108	-0.268252	0.0551591	SIF2	535 amino acid protein containing 4 WD-40 repeats and a nuclear localization signal
YBR104W	1.62495	0.236867	-0.305829	0.0360097	YMC2	mitochondrial carrier protein
YBR105C	2.18511	0.32479	0.399023	0.0263886	VID24	peripheral vesicle membrane protein
YBR106W	1.15017	0.218305	0.18232	0.000366591	PHO88	regulator of Pho81, involved in regulating phosphate transport
YBR107C	-0.136517	0.434793	0.178345	0.261217	IML3	weakly similar to chitin synthases, involved in chromosomal segregation and mitosis
YBR108W	-0.407495	0.226531	0.555072	0.0935899		Probable transcription factor
YBR109C	0.468904	0.0309165	0.149841	0.38903	CMD1	Calmodulin
YBR110W	0.0876769	0.770915	0.0151659	0.799136	ALG1	beta-1,4-mannosyltransferase
YBR111C	-0.589765	0.00954051	-0.23862	0.0378284	YSA1	Homolog to serendipity protein (D. melanogaster)
YBR112C	-0.341743	0.253248	-0.111183	0.374115	CYC8	Transcription regulatory protein
YBR113W	0.140321	0.450798	-0.0540125	0.724944		questionable ORF
YBR114W	-0.290881	0.19129	0.0011681	0.989189	RAD16	Radiation repair protein, putative DNA helicase
YBR115C	0.967191	0.317466	0.385197	0.146945	LYS2	alpha aminoadipate reductase
YBR116C	-0.808113	0.257222	0.335863	0.445169		questionable ORF
YBR117C	-1.26756	0.0860501	0.467606	0.057156	TKL2	transketolase, homologous to tkl1
YBR118W	0.784392	0.11338	0.571118	0.0525832	TEF2	translational elongation factor EF-1 alpha
YBR119W	-0.301751	0.270843	-0.428446	0.0633642	MUD1	U1 snRNP A protein
YBR120C	0.144147	0.0063578	-0.551668	0.00481425	CBP6	Translational activator of COB mRNA
YBR121C	0.973757	0.0662961	0.312585	0.125734	GRS1	Glycyl-tRNA synthase
YBR122C	-0.0868928	0.553959	-0.275073	0.0654336	MRPL36	Mitochondrial ribosomal protein MRPL36 (YmL36)
YBR123C	-0.0646801	0.794681	-0.0721307	0.796489	TFC1	transcription factor tau (TFIIIC) subunit 95
YBR124W	0.147056	0.696897	0.360877	0.216558		questionable ORF
YBR125C	-0.10567	0.455088	0.132586	0.350321	PTC4	Type 2C protein phosphatase
YBR126C	-1.59513	0.000235348	0.253061	0.285855	TPS1	56 kD synthase subunit of trehalose-6-phosphate synthase /phosphatase complex
YBR127C	0.1519	0.718318	0.20004	0.122566	VMA2	vacuolar ATPase V1 domain subunit B (60 kDa)
YBR128C	-1.2697	0.0055636	-0.0542262	0.560333	APG14	involved in autophagy
YBR129C	-0.385896	0.106766	-0.624127	0.046736	OPY1	involved in mating pathway
YBR130C	1.03882	0.108846	-0.199477	0.375346	SHE3	involved in cell polarity
YBR131W	0.485248	0.0362008	-0.249066	0.0727464	CCZ1	involved in sporulation, caffeine, calcium, and zinc sensitivity
YBR132C	-1.20617	0.00899721	0.50014	0.143147	AGP2	Amino acid permease
YBR133C	-0.000643044	0.996279	0.369733	0.150705	HSL7	regulator of Swe1p kinase
YBR134W	-0.079904	0.574477	0.743239	0.0725799		questionable ORF
YBR135W	0.69156	0.0769144	0.0719936	0.676545	CKS1	subunit of the Cdc28 protein kinase
YBR137W	-0.323116	0.305348	-0.425402	0.0144919		hypothetical protein
YBR138C	0.136796	0.498185	-0.0393096	0.87412	HDR1	High-Dosage Reductional segregation defective
YBR139W	-0.965438	0.0632765	0.461401	0.304871		Probable serine-type carboxypeptidase (EC 3.4.16.1)
YBR141C	0.591206	0.0836546	0.0346317	0.78183		hypothetical protein
YBR142W	0.924343	0.0733973	-0.580227	0.0574994	MAK5	Probable pre-mRNA splicing RNA-helicase
YBR143C	0.907355	0.133972	-0.319132	0.046766	SUP45	Homolog of eRF1 (eukaryotic Release Factor 1) in other metazoans.
YBR144C	0.787481	0.0170246	0.111093	0.7073		hypothetical protein
YBR145W	1.6986	0.199756	0.314429	0.178511	ADH5	alcohol dehydrogenase isoenzyme V
YBR146W	0.852689	0.0440025	-0.427577	0.00594732	MRPS9	Probable mitochondrial ribosomal protein S9
YBR147W	0.0868786	0.894272	0.018579	0.909256		strong similarity to hypothetical protein YOL092w
YBR148W	0.05701	0.937874	-0.505072	0.0167376	YSW1	Spore-specific protein
YBR149W	-0.146031	0.56071	0.322233	0.118067	ARA1	D-arabinose dehydrogenase
YBR150C	-0.068491	0.618778	0.277404	0.0847804	TBS1	Probable Zn-finger protein
YBR151W	0.140882	0.673957	0.0484994	0.637535	APD1	Actin Patches Distal
YBR152W	-0.31697	0.186103	-0.0142941	0.805825	SPP381	U4 /U6.U5-associated snRNP protein ; contains a PEST proteolysis motif
YBR153W	0.880774	0.0376299	-0.13762	0.430846	RIB7	Riboflavin biosynthesis protein
YBR154C	0.979098	0.114885	-0.678603	0.0696277	RPB5	25-kDa RNA polymerase subunit (common to polymerases I, II and III)
YBR155W	0.926644	0.015742	-0.423299	0.192251	CNS1	component of Hsp90p chaperone machinery
YBR156C	0.621019	0.0412265	-0.0303469	0.793542	SLI15	Mitotic spindle protein involved in chromosome segregation.
YBR157C	-1.71987	0.00617236	-0.248742	0.0856298	ICS2	Increased Copper Sensitivity
YBR158W	0.23609	0.758909	0.00342223	0.975269	CST13	Chromosome STability protein
YBR159W	-0.407987	0.146111	-0.208231	0.0885047		similarity to human 17-beta-hydroxysteroid dehydrogenase
YBR160W	1.38269	0.0336379	-0.089048	0.311791	CDC28	protein kinase catalytic subunit
YBR161W	-0.0878567	0.596919	0.102575	0.214915		Homolog to suppressor of reduced viability of starvation (SUR1, S. cerevisiae)
YBR162C	2.76781	0.381082	1.02578	0.0628451	TOS1	similarity to hypothetical protein YJL171c
YBR162W-A	1.09084	0.120504	-0.0311668	0.876107	YSY6	involved in the secretory pathway
YBR163W	0.0833052	0.771358	-0.0753215	0.202357	DEM1	Weak similarity to Pta1p (pre-tRNA processing protein)
YBR164C	0.386972	0.146788	-0.307301	0.279078	ARL1	ADP-ribosylation factor-like protein 1
YBR165W	0.47845	0.031594	-0.110575	0.068503	UBS1	positive regulator of CDC34, involved in ubiquitin-mediated degradation
YBR166C	1.07722	0.119813	-0.34833	0.0525408	TYR1	Prephenate dehydrogenase (NADP+)
YBR167C	0.725531	0.0852842	-0.575616	0.0911723	POP7	Pop7 protein, an integral subunit of RNase P and apparent subunit of RNase MRP
YBR168W	-0.331722	0.0134891	-0.238384	0.214573		weak similarity to hypothetical protein YLR324w
YBR169C	-2.0043	0.00130994	-0.237279	0.207386	SSE2	HSP70 family member, highly homologous to Sse1p
YBR170C	-0.388622	0.00916195	-0.121313	0.233975	NPL4	Suppressor of SEC63 (S.cerevisiae), novel ER translocation component
YBR171W	0.46555	0.391763	-0.176381	0.13429	SEC66	glycoprotein complexed with Sec62p and Sec63p in the Sec63 complex, an integral endoplasmic reticulum membrane protein complex required for translocation of presecretory proteins
YBR172C	0.947046	0.0580283	-0.240826	0.324856	SMY2	Kinesin-related protein suppressing myosin defects (MYO2)
YBR173C	0.543488	0.0286891	0.890733	0.0590379	UMP1	20S proteasome maturation factor
YBR174C	-0.0957465	0.828021	0.265429	0.3436		weak similarity to hypothetical protein YLR324w
YBR175W	0.798116	0.356656	-0.0503829	0.123809		Probable GTP-binding protein
YBR176W	0.0688032	0.470898	-0.39432	0.0272441	ECM31	Alpha-Ketoisovalerate Hydroxymethyltransferase
YBR177C	-0.408212	0.268764	0.220858	0.117486	EHT1	alcohol acyl transferase
YBR178W	0.171445	0.631016	0.259353	0.551352		questionable ORF
YBR179C	0.242929	0.484224	-0.167702	0.424784	FZO1	homolog of Drosophila melanogaster fuzzy onions gene ; integral protein of the mitochondrial outer membrane which can be isolated as part of a high molecular weight complex
YBR180W	0.497812	0.321911	-0.383877	0.0541283	DTR1	dityrosine transporter MFS-MDR
YBR181C	1.51748	0.18682	-0.277696	0.0465267	RPS6B	40S ribosomal gene product S6B (S10B) (rp9) (YS4)
YBR182C	1.07337	0.327807	0.10723	0.503376	SMP1	Probable DNA-binding transcription factor, Homolog to SRF /SL-2
YBR183W	-0.329322	0.100358	0.0242859	0.813733	YPC1	alkaline ceramidase with reverse activity
YBR184W	0.532166	0.0530585	-0.540525	0.0165696	MEL1	alpha-galactosidase
YBR185C	-0.219945	0.22958	-0.395388	0.0119799	MBA1	involved in assembly of mitochondrial respiratory complexes
YBR186W	0.490785	0.388445	0.192577	0.445673	PCH2	Putative ATPase
YBR187W	0.690418	0.049929	-0.25747	0.0874836		probable membrane protein
YBR188C	0.492925	0.0530814	-0.025802	0.861508	NTC20	splicing factor
YBR189W	0.950615	0.0510564	0.0472289	0.815976	RPS9B	Ribosomal protein S9B (S13) (rp21) (YS11)
YBR190W	0.854063	0.0849399	0.106675	0.396889		questionable ORF
YBR191W	0.575714	0.535779	0.0804573	0.439971	RPL21A	Ribosomal protein L21A
YBR192W	0.509881	0.00537351	-0.202658	0.15133	RIM2	Probable carrier protein, mitochondrial
YBR193C	-0.344034	0.0129956	0.0389984	0.700481	MED8	Stoichiometric member of mediator complex
YBR194W	0.822733	0.0272782	-0.138921	0.204752		hypothetical protein
YBR195C	0.225699	0.306619	0.0363641	0.407333	MSI1	p50 subunit of the yeast omatin Assembly Factor-I (CAF-I) negative regulator of ras-mediated cAMP induction ; homologous to beta subunit of GTP-binding proteins
YBR196C	1.36769	0.219335	0.633115	0.120857	PGI1	Glucose-6-phosphate isomerase
YBR197C	-0.386843	0.205152	0.13852	0.310188
YBR198C	-0.554594	0.04409	-0.139263	0.110162	TAF90	Probable transcription-associated factor protein, probable -transducin type
YBR200W	-0.154414	0.540836	-0.262693	0.109752	BEM1	contains two SH3 domains
YBR201W	0.0564249	0.888423	-0.235406	0.187108	DER1	involved in degradation in the ER
YBR203W	-0.33775	0.576362	-0.204583	0.0899797		hypothetical protein
YBR204C	-0.904983	0.00040729	-0.36027	0.102683		Probable serine-active lipase, peroxisomal (EX 3.1.1.-)
YBR205W	-0.278798	0.0435951	0.0189958	0.840491	KTR3	Putative alpha-1,2-mannosyltransferase
YBR206W	0.318755	0.295732	0.345148	0.229701		questionable ORF
YBR207W	0.24294	0.453039	0.107703	0.194905	FTH1	probable membrane protein
YBR208C	-0.888462	0.148064	0.245161	0.391158	DUR1,2	Urea amidolyase (contains urea carboxylase and allophanate hydrolase)
YBR209W	2.24866	0.297551	0.381259	0.281716		hypothetical protein
YBR210W	0.94079	0.0540306	0.313341	0.206974		strong similarity to D.melanogaster cornichon protein
YBR211C	-0.31232	0.154179	-0.349552	0.0681097	AME1	regulator of microtubule stability
YBR212W	-0.168754	0.271838	0.70435	0.0553374	NGR1	negative growth regulatory protein
YBR213W	0.273519	0.582529	0.20221	0.245502	MET8	Effector in the expression of PAPS reductase and sulfite reductase
YBR214W	-0.57347	0.126908	-0.125398	0.0633634	SDS24	nuclear protein similar to pombe sds23
YBR215W	0.0170376	0.945053	-0.372938	0.19146	HPC2	highly charged, basic protein
YBR216C	-0.00884559	0.953941	-0.167737	0.234463		strong similarity to hypothetical protein YGL060w
YBR217W	-0.297568	0.0970192	-0.832731	0.0367597	APG12	involved in autophagy
YBR218C	-1.09366	0.00946038	0.31102	0.0362934	PYC2	pyruvate carboxylase
YBR219C	0.335358	0.235667	0.453103	0.146168
YBR220C	-0.147533	0.152773	0.0435356	0.586804		similarity to human acetyl-coenzyme A transporter
YBR221C	0.665724	0.0239793	0.345654	0.0903516	PDB1	beta subunit of pyruvate dehydrogenase (E1 beta)
YBR222C	0.177198	0.32876	0.523833	0.115136	FAT2	Probable AMP-binding protein
YBR223C	-0.360834	0.162989	0.236622	0.0910311		hypothetical protein
YBR224W	0.53332	0.523529	-0.105555	0.45083		questionable ORF
YBR225W	-0.455215	0.133909	0.149731	0.122553		hypothetical protein
YBR226C	-0.149312	0.54034	0.39883	0.134949		questionable ORF
YBR227C	-0.0269079	0.804431	-0.542975	0.061584	MCX1	Mitochondrial ATP-binding protein, similar to ClpX
YBR228W	-0.152511	0.540467	-0.307617	0.0881481		similarity to hypothetical A.thaliana protein
YBR229C	-0.652807	0.00462535	0.346345	0.0664889	ROT2	Glucosidase II
YBR230C	-1.32094	0.00592462	0.609471	0.0989299		hypothetical protein
YBR231C	-0.19458	0.205158	-0.125286	0.492388	AOR1	Actin Overexpression Resistant
YBR232C	-0.258979	0.337666	-0.256882	0.22095		questionable ORF
YBR233W	0.298633	0.196471	-0.16743	0.303628	PBP2	Homolog to human hnRNP complex K protein
YBR234C	-0.150611	0.591347	0.327555	0.154113	ARC40	component of Arp2 /Arp3 protein complex
YBR235W	-0.51011	0.136186	0.324796	0.268142		similarity to bumetanide-sensitive Na-K-Cl cotransport protein
YBR236C	-0.19652	0.061628	-0.424221	0.0749557	ABD1	RNA (guanine-7-)methyltransferase (cap methyltransferase)
YBR237W	-0.0400876	0.626709	-0.669194	0.0264667	PRP5	RNA helicase homolog
YBR238C	1.05117	0.0999587	0.0411284	0.699873		strong similarity to general chromatin factor Spt16p
YBR239C	-0.0799656	0.770885	0.202239	0.315917		Probable Zn-finger protein
YBR240C	0.721962	0.0604182	0.0864964	0.403228	THI2	Probable Zn-finger protein
YBR241C	-0.769271	0.145479	1.14754	0.11548		Probable sugar transport protein
YBR242W	0.224206	0.436105	-0.246551	0.166745		Probable ATP /GTP-binding protein
YBR243C	0.126454	0.601538	0.511759	0.0871178	ALG7	UDP-N-acetyl-glucosamine-1-P transferase (GPT)
YBR244W	-0.0402489	0.87682	-0.11678	0.370779	GPX2	Probable glutathione peroxidase (EC 1.11.1.9)
YBR245C	-0.13302	0.65609	-0.0717416	0.452528	ISW1	ATPase component of a four subunit chromatin remodeling complex
YBR246W	0.388094	0.115108	0.38987	0.0150811		hypothetical protein
YBR247C	0.806603	0.0888806	-0.254804	0.212989	ENP1	Putative 57 kDa protein with an apparent MW of 70 kDa by SDS-PAGE
YBR248C	0.653441	0.163592	-0.191623	0.181164	HIS7	glutamine amidotransferase:cyclase, also called imidazole glycerol phosphate synthase
YBR249C	1.34826	0.153199	0.0325898	0.736941	ARO4	3-deoxy-D-arabino-heptulosonate 7-phosphate (DAHP) synthase isoenzyme
YBR250W	0.224286	0.140767	0.073786	0.397493		hypothetical protein
YBR251W	-0.117869	0.494992	-0.507917	0.0454341	MRPS5	Probable mitochondrial ribosomal protein S5
YBR252W	1.90329	0.147564	0.458421	0.0178449	DUT1	dUTP pyrophosphatase (dUTPase)
YBR253W	-0.147067	0.324101	-0.219064	0.388467	SRB6	transcription factor, part of Srb /Mediator complex
YBR254C	0.639547	0.287172	-0.242985	0.173539	TRS20	TRAPP subunit of 20 kDa involved in targeting and fusion of ER to golgi transport vesicles
YBR255W	-0.418586	0.152902	-0.202386	0.0568619		hypothetical protein
YBR256C	0.930879	0.187487	-0.755503	0.0048475	RIB5	Riboflavin synthase alpha-chain
YBR257W	0.494754	0.121238	-0.462654	0.111725	POP4	protein component of RNase MRP and RNaseP
YBR258C	0.725079	0.0307609	-0.380549	0.163617		hypothetical protein
YBR259W	-0.241352	0.0691616	-0.575328	0.0131914		hypothetical protein
YBR261C	0.539892	0.272526	0.185642	0.109354		similarity to hypothetical S. pombe protein
YBR262C	1.00088	0.0141893	0.0344115	0.723529		questionable ORF
YBR263W	0.150391	0.622693	0.271419	0.29309	SHM1	Serine hydroxymethyltransferase, mitochondrial
YBR264C	0.00771095	0.984648	-0.0126578	0.933117	YPT10	similar to Rab proteins and other small GTP-binding proteins
YBR265W	0.113829	0.660366	0.30299	0.414466	TSC10	3-ketosphinganine reductase
YBR266C	1.12014	0.00458326	-0.302187	0.115279		probable membrane protein
YBR267W	1.6331	0.0127598	-0.218005	0.194116		Probable Zn-finger protein (C2H2 type)
YBR268W	0.962402	0.00347289	0.0270698	0.816614	MRPL37	Probable mitochondrial protein L37
YBR269C	0.0146176	0.90909	0.406038	0.0692605		hypothetical protein
YBR270C	-0.725384	0.0197675	0.832719	0.187402		Probable ATP /GTP-binding protein
YBR271W	0.173872	0.205548	-0.200456	0.480922		weak similarity to S.pombe uvi22 protein and hypothetical protein YNL024c
YBR272C	-0.499032	0.0395236	-0.406583	0.0622653	HSM3	mismatch repair protein /Hsm3p may be a member of the yeast MutS homolog family
YBR273C	-0.221056	0.428905	-0.199288	0.20643
YBR274W	-0.404075	0.114561	-0.0889317	0.240789	CHK1	Protein kinase Chk1
YBR275C	0.0356341	0.696103	-0.0430914	0.807198	RIF1	RAP1-interacting factor, involved in establishment of repressed chromatin
YBR276C	-0.336227	0.13568	-0.283471	0.0581958	PPS1	dual specificity protein phosphatase
YBR277C	-0.260319	0.290686	-0.492391	0.103704		questionable ORF
YBR278W	-0.695528	0.00530388	-0.447941	0.0743348	DPB3	C and C' subunits of DNA polymerase II
YBR279W	0.383691	0.0853094	-0.485133	0.23394	PAF1	RNA polymerase II-associated protein
YBR280C	-0.934037	0.0438418	0.0351739	0.667366		hypothetical protein
YBR281C	0.650829	0.00681753	-0.0227368	0.750042		Probable G-protein, -transducin type
YBR282W	0.71506	0.0306455	-0.464904	0.0800063	MRPL27	Mitochondrial ribosomal protein MRPL27 (YmL27)
YBR283C	0.892968	0.073361	0.823994	0.017031	SSH1	Probable SEC61 protein homolog
YBR284W	0.0196966	0.963814	0.0453693	0.551471		similarity to AMP deaminase
YBR285W	-2.66001	6.84735e-05	0.0742984	0.739764		hypothetical protein
YBR286W	0.251657	0.243028	0.566024	0.182158	APE3	Aminopeptidase yscIII
YBR287W	-0.186294	0.742716	0.355482	0.23565		similarity to hypothetical S. pombe protein
YBR288C	0.750493	0.217498	-0.43257	0.0116433	APM3	clathrin associated protein medium chain
YBR289W	-0.0982697	0.227247	-0.233804	0.0495022	SNF5	subunit of the chromatin remodeling Snf /Swi complex
YBR290W	0.123035	0.70556	-1.12742	0.0460421	BSD2	copper transporter
YBR291C	2.18193	0.241169	-0.0112988	0.793295	CTP1	citrate tranporter in mitochondrial inner membrane
YBR292C	1.03841	0.00951083	0.549402	0.0266575		hypothetical protein
YBR293W	0.386585	0.0505662	-0.194229	0.196222		Probable multidrug resistance protein
YBR294W	-0.287989	0.536212	0.162074	0.148736	SUL1	Probable sulfate transport protein
YBR295W	0.0438715	0.890476	0.203627	0.495256	PCA1	Putative P-type Cu(2+)-transporting ATPase
YBR296C	-1.31625	0.187576	0.351496	0.340942	PHO89	Probable Na+ /Pi symporter
YBR297W	0.42867	0.329588	0.249924	0.0220397	MAL33	MAL-activator protein
YBR298C	-1.17106	0.000745128	0.149218	0.223507	MAL31	Maltose permease
YBR299W	-0.817841	0.0160999	0.0278595	0.875037	MAL32	Maltase
YBR300C	-0.075153	0.792153	0.0947649	0.703544		strong similarity to hypothetical protein YGR293c
YBR301W	-0.0285343	0.869234	0.556362	0.18261		strong similarity to members of the Srp1p/Tip1p family
YBR302C	0.0719795	0.87074	-0.0415887	0.834063	COS2	similar to other members of the Cos family, coded from subtelomeric region
YCL002C	0.233292	0.156894	0.344534	0.157793		strong similarity to Saccharomyces pastorianus hypothetical protein LgYCL002c
YCL004W	-0.136532	0.620223	-0.0281319	0.666836	PGS1	17 kDa phosphatidylglycerolphosphate synthase
YCL005W	0.46109	0.00571255	0.482752	0.038496		strong similarity to Saccharomyces pastorianus hypothetical protein LgYCL005w
YCL007C	0.701382	0.101479	-0.226349	0.0709204	CWH36	involved in cell wall biogenesis
YCL008C	0.427868	0.526864	0.433393	0.330065	STP22	homologous to mouse and human Tsg101 tumor susceptibility genes
YCL009C	0.406934	0.502156	0.342661	0.026809	ILV6	Small regulatory subunit of Acetolactate synthase
YCL010C	-0.25944	0.542622	-0.141021	0.341089		strong similarity to Saccharomyces pastorianus hypothetical protein LgYCL010c
YCL011C	-0.197226	0.367222	-0.111192	0.240099	GBP2	Protein with RNA recognition motifs
YCL012W	-0.532329	0.13665	0.360299	0.0466063		part of budding protein Bud3p due to frameshift in DNA sequence
YCL014W	-0.00251603	0.994412	-0.0929272	0.240244	BUD3	Cell cycle regulated protein required for axial bud formation ; co-assembles with Bud4p at bud sites//budding protein
YCL016C	-0.372371	0.0767552	0.17371	0.401283	DCC1	part of an alternative RFC complex
YCL017C	-0.247721	0.19156	-0.108234	0.411777	NFS1	regulates Iron-Sulfur cluster proteins, cellular Iron uptake, andIron distribution/NifS-like protein
YCL018W	-0.388891	0.0635341	-0.121694	0.301365	LEU2	beta-IPM (isopropylmalate) dehydrogenase
YCL019W	0.103856	0.837669	0.0508785	0.759636		POL polyprotein
YCL020W	-0.0927222	0.651706	-0.0812978	0.348183		GAG polyprotein
YCL022C	-0.0816197	0.757834	0.418621	0.226747		questionable ORF
YCL023C	0.25379	0.1673	0.0576556	0.693748		questionable ORF
YCL024W	-0.0300707	0.875207	0.262927	0.411773	KCC4	protein kinase related to S. pombe Nim1p
YCL025C	-0.0363208	0.961296	-0.229308	0.624638	AGP1	Amino acid permease
YCL028W	-0.138238	0.363796	0.197424	0.0201003	RNQ1	transferable epigenetic modifier
YCL029C	0.318327	0.216061	-0.168714	0.477535	BIK1	Microtubule-binding protein
YCL030C	-0.393405	0.151078	0.00164512	0.981969	HIS4	histidinol dehydrogenase
YCL031C	1.11125	0.0541418	-0.732044	0.0924362	RRP7	involved in rRNA processing
YCL032W	-0.0406727	0.829595	0.0299635	0.769765	STE50	possesses a SAM (sterile alpha motif) ; interacts with G protein and Ste11p//pheromone response pathway protein
YCL033C	-0.578777	0.0161719	0.355919	0.275674		Transcription regulator
YCL034W	-0.788215	0.00914711	0.163243	0.34324		similarity to hypothetical S.pombe protein
YCL035C	-0.276527	0.575274	0.0512373	0.726821	GRX1	Glutaredoxin
YCL036W	-0.428722	0.248572	0.078958	0.324034		similarity to hypothetical protein YDR514c
YCL037C	0.779786	0.0404038	0.870912	0.0215471	SRO9	RNA binding protein with La motif
YCL038C	-1.06236	0.045922	0.335594	0.35327		Membrane transporter
YCL039W	-0.914613	0.0167204	0.385748	0.0143347		regulatory protein
YCL040W	-1.09899	0.000430123	0.136285	0.630781	GLK1	Glucokinase
YCL042W	-0.904722	0.0925061	0.511993	0.183102		questionable ORF
YCL043C	-0.135616	0.27428	0.564922	0.16964	PDI1	protein disulfide isomerase
YCL044C	-0.121534	0.798493	0.324842	0.184231		hypothetical protein
YCL045C	0.173704	0.200526	0.435609	0.110176		weak similarity to human ORF
YCL046W	-0.0751061	0.789396	0.566989	0.078848		questionable ORF
YCL047C	-0.343644	0.0630473	-0.350083	0.0272162		hypothetical protein
YCL048W	-0.293194	0.118608	-0.171433	0.309459		strong similarity to sporulation-specific protein Sps2p
YCL049C	-0.227369	0.581455	0.0200905	0.921243		hypothetical protein
YCL050C	1.20071	0.177533	0.372835	0.0292291	APA1	diadenosine 5',5'''-P1,P4-tetraphosphate phosphorylase I
YCL051W	-0.0562238	0.543067	-0.109476	0.219412	LRE1	involved in laminarase resistance
YCL052C	-0.257454	0.289108	-0.0771601	0.37187	PBN1	Protease B, nonderepressible form
YCL054W	1.5044	0.0615985	-0.774519	0.0520486	SPB1	Putative methyltransferase
YCL055W	0.311924	0.510664	-0.239812	0.116108	KAR4	transcription factor involved in karyogamy
YCL056C	0.188673	0.209921	-0.250851	0.169595		hypothetical protein
YCL057W	-0.452131	0.107207	0.25716	0.346862	PRD1	Saccharolysin (oligopeptidase yscD)
YCL058C	0.442706	0.131743	0.274006	0.0901644		hypothetical protein
YCL059C	0.52802	0.008328	-1.23761	0.0201668	KRR1	involved in cell division and spore germination
YCL061C	-0.682625	0.167643	-0.75395	0.0234436	MRC1	similarity to URK1
YCL063W	0.645439	0.230025	0.65505	0.173555		weak similarity to yeast translation regulator Gcd6p
YCL064C	0.406198	0.309327	-0.438401	0.14835	CHA1	catabolic serine (threonine) dehydratase
YCL065W	0.708566	0.174877	0.689611	0.0647832		hypotetical protein
YCL066W	-0.0209112	0.966128	0.676956	0.191334	HMLALPHA1	transcription factor involved in the regulation of alpha-specific genes
YCL067C	-0.337547	0.193582	-0.924583	0.0535049	HMLALPHA2	Mating type protein alpha-2
YCL068C	-0.765516	0.00313142	0.274495	0.318174		Bud site selection
YCL069W	-0.750488	0.0634177	-0.295666	0.161757		strong similarity to drug resistance protein SGE1
YCL073C	-0.603251	0.0336029	-0.0529118	0.868178		strong similarity to subtelomeric encoded proteins
YCL074W	-0.0852562	0.811691	1.12932	0.34846		Psuedogene: encodes fragment of Ty Pol protein /Reverse transcriptase
YCL075W	1.46202	0.487166	0.0881993	0.681676		Homologous to a portion of the Aspartic protease signature Copia /TY1 family transposons.
YCL076W	0.640368	0.572396	0.0890495	0.303717		Hypothetical ORF
YCR001W	-0.331396	0.210259	-0.457339	0.0818972		weak similarity to chloride channel proteins
YCR002C	0.930212	0.191964	-0.126857	0.0779544	CDC10	conserved potential GTP-ginding protein
YCR003W	0.668654	0.209152	-0.473828	0.0160399	MRPL32	Mitochondrial ribosomal protein MRPL32 (YmL32)
YCR004C	-0.137725	0.610062	0.1396	0.224667	YCP4	FMN-binding protein
YCR005C	1.77653	0.354903	0.183943	0.459116	CIT2	non-mitochondrial citrate synthase
YCR006C	0.542088	0.0268486	0.152313	0.260846
YCR007C	0.420907	0.565118	-0.450712	0.113672
YCR008W	-0.0806075	0.699158	0.424927	0.0328715	SAT4	Ser /Thr protein kinase
YCR009C	-0.15769	0.627394	-0.356895	0.0630434	RVS161	Reduced viability on starvation protein RVS161
YCR010C	-0.374017	0.506463	0.533083	0.0462275	SPG2
YCR012W	0.852055	0.470592	0.485391	0.169739	PGK1	3-phosphoglycerate kinase
YCR013C	1.35028	0.325306	0.508463	0.209038
YCR014C	-0.771655	0.0122403	-0.293423	0.17898	POL4	DNA polymerase IV
YCR015C	0.486597	0.132075	-0.419248	0.214642
YCR016W	1.00687	0.20273	-0.923279	0.0427902
YCR017C	-0.10111	0.555579	0.458468	0.0987551
YCR019W	-0.364235	0.108346	0.122015	0.139666	MAK32	MAK32 sugar kinase
YCR020C	3.0775	0.237443	0.298837	0.0526646	PET18	Transcription regulator
YCR020C-A	0.492002	0.155353	0.32628	0.188952	MAK31	MAK31 snRNP
YCR020W-B	-0.040117	0.817708	-0.863557	0.03945	HTL1	high-temperature lethal
YCR021C	-3.10826	4.92928e-05	0.14467	0.583608	HSP30	Protein induced by heat shock, ethanol treatment, and entry into stationary phase ; located in plasma membrane
YCR022C	1.23398	0.023755	0.414355	0.1491		hypothetical protein
YCR023C	-0.744236	0.0192994	-0.0723097	0.233073		Membrane transporter
YCR024C	0.447689	0.102292	0.0789338	0.0093445		Asn-tRNA synthetase
YCR025C	0.101259	0.685134	0.47878	0.318801		hypothetical protein
YCR027C	0.296523	0.131751	-0.291018	0.0667579	RSG1	rheb-like Gene involved in growth regulation/GTP-binding protein, ras family
YCR028C	-0.0259969	0.918111	-0.0992311	0.1199	FEN2	Amino acid permease
YCR028C-A	0.213249	0.644053	0.343368	0.00516164	RIM1	Single-stranded zinc finger DNA-binding protein
YCR030C	-0.94376	0.0296425	0.509102	0.0120335
YCR033W	0.174663	0.207337	0.147839	0.187996		similarity to nuclear receptor co-repressor N-Cor
YCR034W	1.74401	0.244684	0.648708	0.0305628	FEN1	Probable subunit of 1,3-beta-glucan synthase ; homolog of ELO1
YCR035C	0.494679	0.0166757	-0.502418	0.0190269	RRP43	Component of the exosome 3->5 exoribonuclease complex with Rrp4p, Rrp41p, Rrp42p and Dis3p (Rrp44p).
YCR036W	-0.0969958	0.649902	-0.164009	0.110376	RBK1	ribokinase
YCR037C	0.72709	0.0471204	0.103588	0.30869	PHO87	phosphate permease
YCR038C	-0.428814	0.189091	0.280656	0.117446	BUD5	GTP /GDP exchange factor for Rsr1 protein
YCR039C	-0.239859	0.0186681	-0.856749	0.0563213	MATALPHA2	Mating type protein alpha-2
YCR040W	0.626259	0.109702	-0.0700316	0.817892	MATALPHA1	transcription factor involved in the regulation of alpha-specific genes
YCR041W	0.582362	0.140823	0.508768	0.100166		questionable ORF
YCR042C	0.0113512	0.954435	0.524736	0.0270875	TSM1	TATA binding protein-associated factor (TAF)
YCR043C	1.26096	0.205755	0.087698	0.233125		hypothetical protein
YCR044C	0.217803	0.265515	0.430767	0.169778	PER1	Protein Processing in the ER
YCR046C	0.823583	0.172343	0.130757	0.0259193	IMG1	mitochondrial ribosomal protein
YCR047C	0.291637	0.370007	0.318765	0.0310135		Protein carboxyl methylase
YCR048W	0.273623	0.135605	0.18664	0.387663	ARE1	Acyl-CoA cholesterol acyltransferase (sterol-ester synthetase)
YCR049C	0.452885	0.258363	0.48634	0.0573959		questionable ORF
YCR050C	0.332826	0.359414	0.365425	0.169782		questionable ORF
YCR051W	0.729831	0.054996	0.0669045	0.213159		weak similarity to ankyrins
YCR052W	0.114327	0.272102	0.171944	0.121399	RSC6	subunit of chromatin remodeling complex
YCR054C	0.383872	0.147083	-0.230721	0.255024	CTR86	CTR86 shares a terminator region with THR4. CTR86 contains aGCN4 responsive site suggesting it may also be involved in amino acid biosynthesis.
YCR057C	0.614687	0.0989498	-0.182083	0.229573	PWP2	regulatory protein
YCR059C	1.21011	0.113529	0.317164	0.0224908	PMN1	piecemeal microautophagy of the nucleus (PMN)
YCR060W	1.19892	0.0104003	0.4536	0.0469265		regulatory protein
YCR061W	-0.821055	0.117512	1.11669	0.0170544		similarity to YTP1
YCR063W	-0.297706	0.606713	0.418312	0.264235		similarity to Ytp1p protein
YCR064C	1.03997	0.0652125	0.913456	0.0295206		G10-like protein
YCR065W	0.67388	0.0546676	0.405328	0.00754279
YCR066W	0.0255162	0.962703	0.516519	0.320266	HCM1	Transcription factor (fork head domain)
YCR067C	0.142379	0.123207	0.336716	0.267379	SED4	Intracellular transport protein
YCR068W	-0.803971	0.114627	0.378693	0.177922	CVT17	Putative lipase required for the breakdown of Cvt bodies and autophagic bodies
YCR069W	-0.866027	0.0252097	0.26142	0.209174	SCC3	cyclophilin homolog
YCR071C	0.556109	0.0687678	-0.0552272	0.658278	IMG2	similar to Drosophila gonadal protein Z600 ; involved in mitochondrial DNA maitenance
YCR072C	1.00217	0.0546596	0.141691	0.0160544		regulatory protein
YCR073C	0.758619	0.0446066	0.400324	0.121082	SSK22	protein kinase
YCR073W-A	-1.40461	0.00255808	0.144508	0.0171984	SOL2	shows similarity to glucose-6-phosphate dehydrogenase non-catalytic domains ; homologous to Sol1p and Sol3p
YCR075C	-1.25274	0.00124749	0.491906	0.042821	ERS1	ERS1 protein, ER defect supressor
YCR076C	-0.710707	0.0150866	0.488429	0.198802		hypothetical protein
YCR079W	-0.701125	0.00414669	0.217788	0.0623129		weak similarity to A.thaliana protein phosphatase 2C
YCR081W	0.453559	0.0244124	-0.148265	0.169784	SRB8	RNA polymerase II mediator subunit
YCR082W	-1.00504	0.0234385	0.088433	0.55023		weak similarity to Rbk1p
YCR083W	-0.711527	0.0365516	-0.291894	0.0131387	TRX3	mitochondrial thioredoxin
YCR084C	0.175901	0.723133	0.371075	0.209697	TUP1	glucose repression regulatory protein, exhibits similarity to beta subunits of G proteins
YCR085W	0.862745	0.0829929	0.0192967	0.950372		hypothetical protein
YCR086W	0.319116	0.00508426	0.185	0.285506		involved in nuclear migration
YCR087C-A	1.07763	0.0302983	-0.162117	0.424262		nucleic acid-binding protein
YCR087W	1.01053	0.118125	0.305564	0.213396		questionable ORF
YCR088W	-0.895606	0.047274	0.187194	0.586489	ABP1	Actin binding protein
YCR090C	1.00416	0.0253762	-0.210386	0.2769		similarity to S. pombe SPBC2D10.03c
YCR091W	-1.22701	0.00506188	0.205238	0.338363	KIN82	Putative serine /threonine protein kinase most similar to cyclic nucleotide-dependent protein kinase subfamily and the protein kinase C subfamily
YCR092C	-0.48348	0.0388138	-0.187585	0.0494913	MSH3	mutS homolog, forms a complex with Msh2p to repair insertion-deletion mispairs ; redundant with Pms3 /Msh6p in repair of insertion-deletion mispairs
YCR094W	-0.166205	0.261431	-0.285105	0.126496	CDC50	involved in cell cycle
YCR095C	-0.369932	0.0523746	-0.800845	0.011324		similarity to Saccharomyces kluyveri strain NRRL Y-12651
YCR096C	-0.172143	0.0809558	-0.741497	0.107177	A2	Regulatory protein MATa2p (no known function) ; sequence is the same as the last 119 residues of MATalpha2p
YCR098C	-1.94255	0.0181592	-0.393662	0.0135733	GIT1	permease involved in the uptake of glycerophosphoinositol (GroPIns)
YCR099C	0.284621	0.587361	-0.310666	0.0448155		strong similarity to Pep1p, VTH1p and VTH22p
YCR100C	-0.0767459	0.887484	-0.422956	0.0226773		strong similarity to Pep1p, VTH1p and VTH22p
YCR101C	0.158377	0.673935	-0.386967	0.237268		strong similarity to Pep1p, VTH1p and VTH22p
YCR102C	-0.593629	0.0611127	0.136153	0.39895		similarity to C.carbonum toxD gene/Alcohol dehydrogenase
YCR102W-A	-1.05493	0.0757839	-0.145377	0.633613		similarity to other hypothetical yeast proteins
YCR104W	-0.145326	0.619474	0.715361	0.0364952	PAU3	similar to bovine alcohol dehydrogenase
YCR105W	-0.0163239	0.932643	0.392673	0.00483474		strong similarity to alcohol dehydrogenases
YCR106W	-0.417959	0.0149148	0.0132453	0.917591		similarity to transcription factor
YCR107W	-0.585143	0.00738114	-0.0297911	0.846922	AAD3	hypotetical aryl-alcohol dehydrogenase
YDL001W	0.136053	0.220183	-0.409284	0.243922		similarity to hypothetical protein YFR048w, YDR282c and S.pombe hypothetical protein SPAC12G12.14
YDL002C	-0.124181	0.445377	-0.832104	0.0433031	NHP10	HMG1-box containing protein
YDL003W	0.813712	0.256263	-0.192666	0.546197	MCD1	involved in mitosis, similar to pombe Rad21
YDL004W	-0.428818	0.299618	0.109366	0.155865	ATP16	ATP synthase delta subunit
YDL005C	-0.0830433	0.577141	-0.54554	0.121383	MED2	Stoichiometric member of mediator complex
YDL006W	0.100382	0.450166	-0.215091	0.145234	PTC1	serine-threonine protein phosphatase
YDL007W	0.0551975	0.763801	-0.285701	0.0666059	RPT2	(putative) 26S protease subunit
YDL008W	0.0184877	0.921956	-0.10816	0.0594717	APC11	subunit of the anaphase promoting complex (APC)
YDL009C	-0.0409415	0.778351	-0.345899	0.014787		questionable ORF
YDL010W	-0.417772	0.133883	-0.291335	0.185763		similarity to hypothetical protein YBR014c and glutaredoxins
YDL011C	0.383585	0.508088	0.204122	0.308382		questionable ORF
YDL012C	0.526863	0.00141066	0.481653	0.0919981		strong similarity to hypothetical protein YBR016w and YDR210w
YDL013W	0.175419	0.600075	-0.0218525	0.900998	HEX3	involved in hexose metabolism
YDL014W	1.21713	0.0173784	0.239869	0.0143769	NOP1	nucleolar protein, homologous to mammalian fibrillarin
YDL015C	0.333797	0.343676	0.248457	0.0779701		similarity to rat synaptic glycoprotein SC2
YDL016C	0.754176	0.124127	0.607221	0.0275805		questionable ORF
YDL017W	0.719726	0.00700091	-0.19292	0.307522	CDC7	serine /threonine protein kinase
YDL018C	-0.120003	0.219699	-0.108893	0.475778	ERP3	p24 protein involved in membrane trafficking
YDL019C	-0.916868	0.0278418	0.0709443	0.226825	OSH2	OSbp Homologue (OSBP stands for Oxysterol binding protein)
YDL020C	-0.477872	0.0754156	-0.309636	0.0589405	RPN4	ubiquitin-mediated 26S proteasome subunit
YDL021W	-2.17789	0.000219858	-0.684972	0.0166779	GPM2	phosphoglycerate mutase, involved in glycolysis
YDL022W	-2.23984	0.000421514	-0.162894	0.214924	GPD1	glycerol-3-phosphate dehydrogenase
YDL023C	-1.8502	0.0113923	0.167938	0.445908		questionable ORF
YDL024C	-0.973301	0.013771	0.0640906	0.814964	DIA3	strong similarity to acid phosphatase/Digs Into Agar
YDL025C	-0.0141923	0.96946	-0.00793928	0.893997		similarity to probable protein kinase NPR1
YDL026W	-1.02526	0.0103504	0.0787843	0.565144		questionable ORF
YDL027C	-1.00923	0.00326898	-0.0570183	0.368916		hypothetical protein
YDL028C	-0.107956	0.562733	-0.50901	0.0645393	MPS1	serine /threonine /tyrosine protein kinase (dual specificity), able to autophosphorylate as well as act on Mad1p. A mutation predicted to abolish kinase function eliminates in vitro protein kinase activity and behaves like a null mutation in vivo.
YDL029W	-0.0799137	0.719227	-0.264988	0.175734	ARP2	actin-related protein
YDL030W	-0.038229	0.698752	-0.280229	0.090721	PRP9	RNA splicing factor
YDL031W	0.823863	0.00501939	-0.437195	0.0764367	DBP10	DEAD box protein 10/similar to RNA helicases
YDL032W	-0.65316	0.213773	0.251628	0.709685		questionable ORF
YDL033C	0.179488	0.490492	0.258496	0.137638		similarity to H.influenzae hypothetical protein HI0174
YDL034W	0.0892707	0.880378	0.161513	0.531364		questionable ORF
YDL036C	0.0147597	0.890118	-0.315569	0.105895		strong similarity to RIB2 protein
YDL037C	0.559272	0.657413	0.237176	0.213658		strong similarity to glucan 1,4-alpha-glucosidase
YDL038C	1.32316	0.102415	0.6259	0.0131861		similarity to mucin proteins
YDL039C	1.60849	0.392721	0.7642	0.12621	PRM7	pheromone-regulated membrane protein
YDL040C	0.633411	0.0482082	-0.0795521	0.100518	NAT1	N-terminal acetyltransferase
YDL041W	0.174288	0.642504	0.258376	0.625896	KRE26	Killer toxin REsistant
YDL042C	-0.101188	0.794706	-0.073951	0.456369	SIR2	regulator of silencing at HML, HMR, telomeres, and rDNA
YDL043C	-0.525631	0.22188	-0.541711	0.0578795	PRP11	snRNA-associated protein
YDL044C	0.102866	0.60356	-0.643456	0.0154152	MTF2	involved in mRNA splicing
YDL045C	-0.127654	0.444296	0.100243	0.111353	FAD1	FAD synthetase
YDL045W-A	0.852423	0.0832534	0.0920716	0.621865	MRP10	homologous to Yml37p, component of the 37 S subunit of mitochondrial ribosomes
YDL046W	0.389096	0.168441	0.785538	0.125		hypothetical protein
YDL047W	-0.238231	0.287941	0.196121	0.16732	SIT4	type 2A related protein phosphatase
YDL048C	-0.998208	0.0869573	0.0569481	0.846017	STP4	involved in tRNA splicing
YDL049C	-1.07022	0.0252072	-0.199903	0.363226	KNH1	KRE9 homolog
YDL050C	0.972965	0.0382181	-0.383737	0.04094		questionable ORF
YDL051W	0.92699	0.0868013	-0.409083	0.039836	LHP1	RNA binding protein similar to human La autoantigen
YDL052C	0.593665	0.0807813	0.423616	0.0832316	SLC1	putative 1-acyl-sn-gylcerol-3-phosphate acyl transferase
YDL053C	0.286154	0.157281	-0.402548	0.0294449		hypothetical protein
YDL054C	0.512041	0.39911	0.32668	0.576798		hypothetical protein
YDL055C	2.63832	0.396373	0.381406	0.0898389	PSA1	mannose-1-phosphate guanyltransferase, GDP-mannose pyrophosphorylase
YDL056W	-0.208891	0.164897	-0.13055	0.243232	MBP1	transcription factor
YDL057W	0.144105	0.752697	0.00423455	0.977191		hypothetical protein
YDL058W	-0.0941124	0.672961	-0.152438	0.426708	USO1	Integrin analogue gene
YDL059C	-0.652212	0.142895	-0.147627	0.451259	RAD59	The RAD59 gene product has homology to the Rad52 protein.
YDL060W	1.03469	0.0306385	-0.336746	0.114775		similarity to C.elegans hypothetical protein
YDL061C	0.91652	0.0597693	0.896322	0.0175453	RPS29B	Ribosomal protein S29B (S36B) (YS29)
YDL062W	0.588833	0.056816	-0.232949	0.322515		questionable ORF
YDL063C	1.32883	0.162841	-0.563187	0.0841771		weak similarity to human estrogen-responsive finger protein
YDL064W	0.708024	0.0183378	0.148529	0.275721	UBC9	ubiquitin-conjugating enzyme
YDL065C	-0.0651768	0.636245	-0.373827	0.192819	PEX19	40 kDa farnesylated protein associated with peroxisomes
YDL066W	-0.667711	0.0327466	0.379129	0.189583	IDP1	Mitochondrial form of NADP-specific isocitrate dehydrogenase
YDL067C	-0.270722	0.172637	0.191353	0.334546	COX9	Subunit VIIa of cytochrome c oxidase
YDL068W	-0.541703	0.265906	-0.122315	0.284519		questionable ORF
YDL069C	-0.169212	0.63331	-0.54544	0.120167	CBS1	translational activator of cytochrome b
YDL070W	-0.0125823	0.963502	-0.496673	0.103736	BDF2	Bromodomain protein, homolog of Bdf1
YDL071C	0.683244	0.0476449	0.43366	0.256079		questionable ORF
YDL072C	0.334946	0.433316	0.397778	0.134447		weak similarity to hypothetical protein YMR040w
YDL073W	0.365624	0.216148	-0.175678	0.135267		weak similarity to Cyprinus carpio calcium channel protein
YDL074C	0.331837	0.279826	-0.715733	0.0206438	BRE1	weak similarity to spindle pole body protein NUF1
YDL075W	1.7348	0.0597638	-0.16966	0.560639	RPL31A	Ribosomal protein L31A (L34A) (YL28)
YDL076C	0.604763	0.0438425	-0.00609782	0.852663		hypothetical protein
YDL077C	0.181972	0.199757	-0.261035	0.240744	VAM6	involved in vacuolar morphogenesis
YDL078C	-0.586805	0.122162	0.177881	0.436846	MDH3	malate dehydrogenase
YDL079C	-0.272614	0.397037	0.394392	0.0917439	MRK1	MDS1 related protein kinase
YDL080C	0.648126	0.118077	-0.140476	0.0737491	THI3	alpha-ketoisocaproate decarboxylase
YDL081C	2.3083	0.013332	0.74597	0.0295507	RPP1A	Acidic ribosomal protein P1A (YP1alpha) (A1)
YDL082W	1.54659	0.00398878	-0.104411	0.593609	RPL13A	Ribosomal protein L13A
YDL083C	1.9126	0.0191912	0.226168	0.0251239	RPS16B	Ribosomal protein S16B (rp61R)
YDL084W	0.459466	0.336091	-0.160124	0.0150366	SUB2	RNA helicase
YDL085W	-2.36622	0.00121202	0.187522	0.517938		strong similarity to NADH dehydrogenase (ubiquinone)
YDL086W	-0.535396	0.0242015	0.397887	0.0941362		similarity to hypothetical Synechocystis protein
YDL087C	-0.138391	0.603732	0.0484124	0.89322	LUC7	(putative) involved in mRNA processing
YDL088C	0.371631	0.0154469	0.0462359	0.621391	ASM4	suppressor of temperature-sensitive mutations in Pol3p/Nuclear pore complex protein
YDL089W	-0.62138	0.0135289	0.301911	0.0677401		hypothetical protein
YDL090C	-0.52841	0.0321675	0.0767842	0.627783	RAM1	beta subunit of farnesyltransferase
YDL091C	-1.62532	0.00270935	-0.345781	0.0443377		weak similarity to mouse FAF1 protein
YDL092W	0.634069	0.0792423	-0.308396	0.281822	SRP14	Signal recognition particle subunit
YDL093W	-0.783991	0.00868333	0.267041	0.170564	PMT5	dolichyl phosphate-D-mannose:protein O-D-mannosyltransferase
YDL094C	-0.270539	0.205071	-0.00947456	0.97116		questionable ORF
YDL095W	-0.130835	0.501836	0.396133	0.0825777	PMT1	dolichyl phosphate-D-mannose:protein O-D-mannosyltransferase
YDL096C	0.148211	0.871122	0.624711	0.0955926		questionable ORF
YDL097C	-0.0284237	0.89524	-0.352624	0.0339152	RPN6	Subunit of the regulatory particle of the proteasome
YDL098C	0.117448	0.71445	-0.755396	0.0865409	SNU23	Putative RNA binding zinc finger protein
YDL099W	-0.143156	0.421845	-0.817589	0.0545878		weak similarity to myosin heavy chain proteins
YDL100C	-0.170083	0.375365	-0.259485	0.0349019		similarity to E.coli arsenical pump-driving ATPase
YDL101C	0.0573894	0.852545	-0.17846	0.289409	DUN1	protein kinase
YDL102W	0.429314	0.014366	0.0676486	0.35732	CDC2	largest and catalytic subunit of DNA polymerase III (delta)
YDL103C	-0.431275	0.149075	-0.13098	0.313073	QRI1	UDP-N-acetylglucosamine pyrophosphorylase
YDL104C	-0.601421	0.0813286	-0.280989	0.0461402	QRI7	similar to H.influenzae sialoglycoprotease
YDL105W	-0.588617	0.101119	-0.167017	0.434403	QRI2	protein of unknown function
YDL106C	0.106761	0.529387	-0.154023	0.0329314	PHO2	Homeobox-domain containing transcription fractor which is a positive regulator of PHO5 and other genes.
YDL107W	-0.111406	0.495411	-0.578987	0.0672767	MSS2	cox1 pre-mRNA splicing factor
YDL108W	-0.207303	0.262018	-0.26891	0.0680864	KIN28	serine-threonine kinase, subunit of transcription factor TFIIK, a subcomplex of TFIIH
YDL109C	-0.805134	0.0992461	0.0533467	0.564387		lipase family protein containing serine active site
YDL110C	-0.513178	0.168343	-0.179036	0.0638271		hypothetical protein
YDL111C	1.16291	0.0120091	0.2741	0.285734	RRP42	Component of the exosome 3->5 exoribonuclease complex with Rrp4p, Rrp41p, Rrp43p and Dis3p (Rrp44p).
YDL112W	0.21217	0.316664	-0.0421001	0.687355	TRM3	tRNA (Gm18) ribose methylase
YDL113C	-0.748112	0.0322691	-0.550342	0.135214		similarity to hypothetical protein YDR425w
YDL114W	-0.107089	0.764459	0.456559	0.345341		weak similarity to Rhizobium nodulation protein nodG
YDL115C	-0.382702	0.0754064	-0.694573	0.0212114		hypothetical protein
YDL116W	0.301172	0.112455	-0.182555	0.0679822	NUP84	Protein with homology to mammalian Nup107p
YDL117W	0.90346	0.20711	-0.0479902	0.673449	CYK3	involved in CYtoKinesis
YDL118W	0.62828	0.087223	-0.176376	0.706541		questionable ORF
YDL119C	0.452445	0.225416	-0.213991	0.0598017		similarity to bovine Graves disease carrier protein
YDL120W	0.0925695	0.782716	-0.169469	0.0918139	YFH1	mitochondrial protein that regulates mitochondrial iron accumulation
YDL121C	0.373619	0.15973	-0.374311	0.109228		hypothetical protein
YDL122W	0.908685	0.0217616	-0.405311	0.0346395	UBP1	Ubiquitin-specific protease
YDL123W	0.408394	0.540583	0.324833	0.113867		similarity to hypothetical protein YJL151c
YDL124W	-1.16318	0.00602663	0.428475	0.154349		similarity to aldose reductases
YDL125C	-0.033797	0.824602	0.48699	0.19215	HNT1	similarity to protein kinase C inhibitor-I
YDL126C	-0.134562	0.138641	-0.0432365	0.67102	CDC48	microsomal ATPase
YDL127W	0.301438	0.405353	0.272462	0.0839064	PCL2	G1 cyclin
YDL128W	-0.255529	0.321427	0.624347	0.108734	VCX1	vacuolar H+ /Ca2+ exchanger
YDL129W	-0.321433	0.272821	0.0105938	0.960449		hypothetical protein
YDL130W	1.82898	0.0176512	0.438307	0.0119058	RPP1B	Ribosomal protein P1B (L44') (YP1beta) (Ax)
YDL130W-A	-1.45668	0.00437869	-0.304107	0.162528	STF1	ATPase stabilizing factor
YDL131W	1.32549	0.309094	0.398346	0.114531	LYS21	homocitrate synthase, highly homologous to YDL182W
YDL132W	-0.203181	0.312247	-0.262238	0.0593956	CDC53	involved in G1 cyclin degradation
YDL133W	0.347033	0.369791	-0.126823	0.191933		hypothetical protein
YDL134C	-0.476615	0.0945197	-0.102178	0.435668	PPH21	serine-threonine protein phosphatase 2A
YDL135C	0.182589	0.165689	-0.549611	0.091923	RDI1	Rho GDP dissociation inhibitor
YDL136W	0.519972	0.169364	-0.586988	0.0922902	RPL35B	Ribosomal protein L35B
YDL137W	0.423012	0.154126	-0.0419858	0.684144	ARF2	ADP-ribosylation factor 2
YDL138W	-0.430587	0.0279685	0.278348	0.191656	RGT2	glucose permease
YDL139C	-0.358075	0.20304	-0.325932	0.0712376	SCM3	Suppressor of chromosome missegregation
YDL141W	-0.564128	0.100109	0.176093	0.290828	BPL1	Biotin:apoprotein ligase
YDL142C	-0.634854	0.0144031	0.0561467	0.521873	CRD1	Cardiolipin synthase
YDL143W	0.352462	0.434555	-0.169587	0.0185571	CCT4	component of chaperonin complex
YDL144C	-0.360153	0.0220068	0.370384	0.228766		hypothetical protein
YDL145C	-0.0579709	0.876174	0.207658	0.019681	COP1	alpha subunit of the coatamer complex ; gamma-alpha-COP
YDL146W	0.108466	0.805769	-0.224459	0.0169627		weak similarity to Orc3p
YDL147W	0.021536	0.928633	-0.526445	0.184525	RPN5	Subunit of the regulatory particle of the proteasome
YDL148C	0.61922	0.107532	-0.949342	0.0276289		similarity to human mRNA clone RES4-25
YDL149W	-0.435037	0.303753	0.142861	0.513224	APG9	Integral membrane protein
YDL150W	1.49875	0.209194	-0.468431	0.0445909	RPC53	RNA polymerase III (C) subunit, homologus to human BN51 protein
YDL151C	0.809576	0.191172	0.0281895	0.618051		questionable ORF
YDL152W	0.784222	0.036007	-0.555624	0.0470284		questionable ORF
YDL153C	0.406384	0.0623174	-1.11877	0.0186008	SAS10	nuclear protein involved in silencing
YDL154W	-0.105679	0.814844	-0.028283	0.909085	MSH5	MutS homolog involved in chromosome exchange
YDL155W	0.590046	0.0112137	-0.0872143	0.590242	CLB3	G(sub)2-specific B-type cyclin
YDL156W	-0.236025	0.456206	0.0550284	0.770565		weak similarity to Pas7p
YDL157C	0.141937	0.673119	-0.231667	0.065137		hypothetical protein
YDL158C	0.116794	0.624666	0.0359778	0.325585		questionable ORF
YDL159W	-0.359039	0.156765	-0.00815283	0.905637	STE7	MEK homolog
YDL160C	0.0787604	0.653764	0.314204	0.0691646	DHH1	(putative) DEAD box RNA helicase
YDL161W	-0.053916	0.686584	-0.259938	0.316153	ENT1	Ent1p
YDL162C	0.146613	0.724382	1.64268	0.43112		hypothetical protein
YDL163W	0.190818	0.59089	-0.128224	0.732773		questionable ORF
YDL164C	-0.266799	0.417581	0.0095397	0.964252	CDC9	DNA ligase
YDL165W	-0.10369	0.316965	0.213794	0.112409	CDC36	nuclear protein that negatively regulates basal transcription
YDL166C	1.00726	0.126517	-0.175165	0.143857		weak similarity to Pyrococcus horikoshii hypothetical protein PHBJ019
YDL167C	1.57907	0.0504526	-0.0658756	0.682902	NRP1	Asparagine-rich protein
YDL168W	-0.267081	0.359882	0.0881057	0.405226	SFA1	Long-chain alcohol dehydrogenase (glutathione-dependent formaldehyde dehydrogenase)
YDL170W	-0.0639068	0.729886	-0.382276	0.0580973	UGA3	zinc-finger transcription factor of the Zn(2)-Cys(6) binuclear cluster domain type
YDL172C	0.063478	0.863185	0.0807165	0.553782		questionable ORF
YDL173W	-0.34661	0.247676	-0.514273	0.127087		hypothetical protein
YDL175C	0.181797	0.280407	-0.252502	0.242408		strong similarity to hypothetical protein YIL079c and weak similarity to cellular nucleic acid binding proteins
YDL176W	-0.841504	0.0128171	-0.397518	0.138906		hypothetical protein
YDL177C	0.700959	0.0871226	-0.546722	0.0302648		similarity to hypothetical protein YCR059c
YDL178W	0.152736	0.67104	-0.141893	0.161496	AIP2	D-Lactate Dehydrogenase (Cytochrome)
YDL179W	0.595904	0.484834	0.0735586	0.40755	PCL9	cyclin like protein interacting with Pho85p
YDL180W	0.167737	0.662254	0.239444	0.0459052		hypothetical protein
YDL181W	-1.74369	0.00175597	0.554534	0.12077	INH1	ATPase inhibitor
YDL182W	1.29541	0.310673	0.429485	0.0601763	LYS20	homocitrate synthase, highly homologous to YDL131W
YDL183C	0.00204537	0.991083	-0.0650214	0.285577		weak similarity to S.pombe hypothetical protein SPAC23H3
YDL184C	-0.026897	0.952411	-0.175431	0.57289	RPL41A	Ribosomal protein L41A (YL41) (L47A)
YDL185W	-0.928308	7.52782e-05	0.207327	0.280077	TFP1	vacuolar ATPase V1 domain subunit A (69 kDa)
YDL186W	1.45202	0.05972	0.353083	0.0577844		hypothetical protein
YDL187C	1.57317	0.174057	0.418449	0.0793447		questionable ORF
YDL188C	-0.554522	0.063017	-0.0199299	0.903187	PPH22	serine-threonine protein phosphatase 2A
YDL189W	0.348379	0.0947813	-0.0154024	0.943444		hypothetical protein
YDL190C	0.0488541	0.794255	0.43089	0.0424036	UFD2	ubiquitin fusion degradation protein
YDL191W	0.617598	0.254341	-0.560366	0.0362137	RPL35A	Ribosomal protein L35A
YDL192W	0.905223	0.321041	-0.27491	0.0226394	ARF1	ADP-ribosylation factor
YDL193W	-0.25215	0.0708104	-0.193348	0.115481		similarity to N.crassa hypothetical 32 kDa protein
YDL195W	-0.339966	0.314912	0.660613	0.041363	SEC31	Component (p150) of COPII coat of secretory pathway vesicles
YDL196W	-0.280746	0.421683	1.06183	0.00245613		hypothetical protein
YDL197C	-0.733337	0.0319007	0.00868111	0.970813	ASF2	Anti-silencing protein, involved in transcription
YDL198C	0.806399	0.216854	0.159595	0.321457	YHM1	(putative) mitochondrial carrier protein
YDL199C	-0.303571	0.468247	0.244285	0.00658233		similarity to sugar transporter proteins
YDL200C	-0.552904	0.0190784	-0.457047	0.0170609	MGT1	6-O-methylguanine-DNA methylase
YDL201W	0.1353	0.488687	-0.219848	0.147447		putative methyltransferase
YDL202W	0.27352	0.05389	-0.59431	0.0339758	MRPL11	Mitochondrial ribosomal protein MRPL11 (YmL11)
YDL203C	-0.566324	0.0758267	0.10498	0.59574		similarity to Skt5p
YDL204W	-2.04612	0.00108848	0.196659	0.218791		similarity to hypothetical protein YDR233c
YDL205C	0.706061	0.103538	0.0880524	0.385893	HEM3	phorphobilinogen deaminase (uroporphyrinogen synthase), the third step in heme biosynthesis
YDL206W	-0.611999	0.0263114	-0.204292	0.285906		weak similarity to transporter proteins
YDL207W	-0.0662224	0.59082	-0.27823	0.00836875	GLE1	Nuclear-export-signal (NES)-containing protein
YDL208W	1.30347	0.100387	-0.607502	0.0631181	NHP2	HMG-like nuclear protein
YDL209C	0.180697	0.216	-0.405045	0.0338144		similarity to hypothetical S. pombe protein
YDL210W	-1.79115	0.00997227	0.0742757	0.752956	UGA4	GABA-specific transport protein
YDL211C	1.21912	0.0369534	0.480893	0.0582696		similarity to hypothetical protein YNL176c
YDL212W	0.399559	0.448346	-0.0584489	0.297279	SHR3	Integral membrane component of the endoplasmic reticulum
YDL213C	0.786465	0.0525484	-0.458602	0.0915768		has an RNA recognition domain in the N-terminal region
YDL214C	-0.344553	0.465746	0.119787	0.385989		strong similarity to putative protein kinase NPR1
YDL215C	0.691585	0.55081	-0.119109	0.0249267	GDH2	NAD-dependent glutamate dehydrogenase
YDL216C	-0.799667	0.00336815	-0.67251	0.0273968		similarity to Jun activation domain binding protein homologue of A. thaliana
YDL217C	0.398376	0.233655	-0.0577596	0.585116	TIM22	Mitochondrial inner membrane protein involved in import
YDL218W	-0.679642	0.306491	0.578567	0.101427		weak similarity to hypothetical protein YNR061c
YDL219W	0.387882	0.472227	-0.591291	0.0939363		strong similarity to S.equisimilis hypothetical protein
YDL220C	-0.50093	0.164047	0.217237	0.0469936	CDC13	binds to single-stranded TG1-3 telomere G-tails
YDL221W	-0.0747484	0.853978	0.741668	0.0882764		questionable ORF
YDL222C	-0.524231	0.495337	0.883755	0.0891556		strong similarity to hypothetical protein YNL194c and similarity to YML052w
YDL223C	-0.935502	0.167644	0.48016	0.19204		weak similarity to mucin
YDL224C	-0.489768	0.173554	0.548574	0.0896454	WHI4	Possible RNA binding protein. Homolog of Whi3.
YDL225W	0.383302	0.0418251	-0.544262	0.0995037	SHS1	Septin homolog
YDL226C	-0.0623909	0.862375	-0.239541	0.055931	GCS1	ADP-ribosylation factor GTPase-activating protein (ARF GAP)
YDL227C	-0.670074	0.0288385	-0.277032	0.260999	HO	Homothallic switching endonuclease
YDL230W	0.396837	0.510923	0.290638	0.17379		similarity to A.klebsiana glutamate dehydrogenase
YDL231C	-0.333232	0.270377	0.0261973	0.797759	BRE4	null mutant is sensitive to brefeldin A
YDL232W	0.556386	0.171766	0.665396	0.0537376	OST4	3.6-kDa protein, probably membrane-located
YDL233W	0.303609	0.0216461	0.21626	0.088404		hypothetical protein
YDL234C	0.292553	0.621132	-0.305387	0.0134822	GYP7	GTPase-activating protein
YDL235C	0.908728	0.280576	-0.137079	0.372324	YPD1	Two-component phosphorelay intermediate
YDL236W	0.368902	0.662198	-0.264932	0.0616402	PHO13	p-nitrophenyl phosphatase
YDL237W	-0.475581	0.235763	0.126189	0.512782		hypothetical protein
YDL238C	0.489471	0.521598	0.0916366	0.791938		similarity to E.coli hypothetical protein and to chlorohydrolases
YDL239C	-1.30179	0.00416318	-0.200762	0.16338		hypothetical protein
YDL240W	0.0786163	0.760144	-0.0960998	0.149063	LRG1	Protein similar to LIM-domain proteins and to rho /rac GTPase-activating family of proteins
YDL241W	1.34253	0.00830168	0.016269	0.90545		hypothetical protein
YDL242W	0.305363	0.380731	0.30631	0.308433		strong similarity to hypothetical protein YPR079w
YDL243C	-0.531257	8.97975e-05	-0.0238249	0.669	AAD4	Hypothetical aryl-alcohol dehydrogenase
YDL244W	4.75725	0.379678	0.509833	0.420518	THI13	strong similarity to Thi5p, YJR156c, YNL332w and A.parasiticus, S.pombe nmt1 protein
YDL245C	-1.06518	0.00201962	0.13236	0.452056	HXT15	Hexose transporter
YDL246C	-0.733958	0.0342515	-0.714909	0.0338084		strong similarity to Sor1p
YDL247W	0.401988	0.29375	0.276719	0.279349		strong similarity to sugar transport proteins
YDL248W	0.0319983	0.938238	-0.106851	0.451324	COS7	similar to other subtelomerically-encoded proteins
YDR001C	-1.20815	9.87295e-05	0.00639482	0.965736	NTH1	neutral trehalase
YDR002W	0.875252	0.203411	-0.715101	0.0232152	YRB1	nuclear GTPase-activating protein for Ran
YDR003W	-0.546867	0.00401131	0.0847787	0.218759		strong similarity to hypothetical protein YBR005w
YDR004W	-0.662385	0.142029	-0.223798	0.193769	RAD57	RecA homolog (similar to DMC1, RAD51, and RAD55), interacts with Rad 55p by two-hybrid analysis
YDR005C	-1.36268	0.00445917	-0.544239	0.00667193	MAF1	Mod5 protein sorting
YDR006C	0.192404	0.669221	0.0886967	0.465921	SOK1	high copy suppressor of cAMP-dependent protein kinase A temperature-sensitive mutations
YDR007W	0.116953	0.780421	1.5707	0.0239376	TRP1	n-(5'-phosphoribosyl)-anthranilate isomerase
YDR008C	0.107682	0.727881	1.52905	0.070138		questionable ORF
YDR009W	-0.462846	0.233772	0.121736	0.595206	GAL3	involved in galactose induction of GAL genes
YDR010C	0.747125	0.356767	3.07957	0.406923		hypothetical protein
YDR011W	-0.724372	0.00302305	0.473284	0.166713	SNQ2	ABC transporter
YDR012W	1.36581	0.0645505	0.217296	0.215144	RPL4B	Ribosomal protein L4B (L2B) (rp2) (YL2)
YDR013W	0.478782	0.126973	-0.3703	0.0800201		similarity to human hypothetical KIAA0186 protein
YDR015C	0.267786	0.113755	0.174031	0.283609		weak similarity to chicken neurofilament triplet M protein
YDR016C	0.0854116	0.699041	-0.143613	0.413611	DAD1	Duo1 And Dam1 interacting ; localized to intranuclear spindles and spindle pole bodies
YDR018C	-1.28502	0.000615924	-0.142919	0.708621		strong similarity to hypothetical protein YBR042c
YDR019C	1.04967	0.281084	-0.179809	0.152228	GCV1	glycine cleavage T protein (T subunit of glycine decarboxylase complex
YDR020C	0.766645	0.0971576	-0.361946	0.0155624		weak similarity to uridine kinases and phosphoribulokinases
YDR021W	0.521638	0.162057	-0.477787	0.0674473	FAL1	DEAD-box protein, putative RNA helicase
YDR022C	-0.996947	0.00235852	-0.303557	0.148574	CIS1	involved in microtubule assembly
YDR023W	0.210567	0.565408	-0.622335	0.0253818	SES1	seryl-tRNA synthetase
YDR024W	0.400138	0.26456	-0.0233193	0.801887		hypothetical protein
YDR025W	1.14703	0.119008	0.332549	0.167976	RPS11A	Ribosomal protein S11A (S18A) (rp41A) (YS12)
YDR026C	0.462066	0.0328621	-1.05086	0.023256		strong similarity to DNA-binding protein Reb1p
YDR028C	-0.391316	0.00642789	-0.474576	0.00955352	REG1	regulator of phosphatase Glc7p, involved in glucose repression
YDR029W	0.623464	0.383806	0.039166	0.861827		hypothetical protein
YDR030C	-0.391518	0.095676	-0.614657	0.0540648	RAD28	involved in DNA repair, has WD repeats
YDR031W	-0.586035	0.00267854	-0.189381	0.102032		hypothetical protein
YDR032C	-0.269385	0.140904	0.497383	0.177652	PST2	Protoplasts-SecreTed protein ; the gene product was detected among the proteins secreted by regenerating protoplasts
YDR033W	0.140284	0.704385	0.146789	0.529132	MRH1	Membrane protein Related to Hsp30p ; Localized by immunofluorescence to cell membranes, primarily the plasma membrane. A punctuate immunofluorescence pattern was observed within cell buds. The nuclear envelope, but not the vacuole or mitochondrial membrane
YDR034C	0.219685	0.718997	-0.165192	0.0170139	LYS14	transcription factor involved in lysine biosynthesis
YDR034C-A	0.0843892	0.851245	-0.224333	0.0387726		identified by SAGE expression analysis
YDR034W-B	0.555898	0.529195	0.32846	0.115295
YDR035W	0.194887	0.571908	-0.288026	0.0531588	ARO3	DAHP synthase ; a.k.a. phospho-2-dehydro-3-deoxyheptonate aldolase, phenylalanine-inhibited ; phospho-2-keto-3-deoxyheptonate aldolase ; 2-dehydro-3-deoxyphosphoheptonate aldolase ; 3-deoxy-D-arabine-heptulosonate-7-phosphate synthase
YDR036C	0.129284	0.673432	0.0874542	0.511272		similarity to enoyl CoA hydratase
YDR037W	1.27898	0.141916	-0.0563395	0.35776	KRS1	lysyl-tRNA synthetase
YDR038C	-0.471957	0.118268	0.273468	0.192867	ENA5	Na(+) ATPase
YDR039C	-0.546251	0.0543395	0.275283	0.151392	ENA2	plasma membrane protein ; putative Na+ pump ; P-type ATPase
YDR040C	-0.483986	0.143006	0.231573	0.217763	ENA1	Plasma membrane Na+ pump ; P-type ATPase
YDR041W	-0.553292	0.150874	-0.235427	0.175352	RSM10	protein of the small subunit of the mitochondrial ribosome
YDR042C	0.0670444	0.880262	0.0705176	0.487522		hypothetical protein
YDR043C	-0.133002	0.52097	-0.167068	0.142059	NRG1	transcriptional repressor which can bind to UAS-1 in the STA1 promoter and which can interact with Ssn6p
YDR044W	0.226294	0.679223	0.507142	0.165909	HEM13	Coproporphyrinogen III oxidase
YDR045C	1.08571	0.174674	-0.373094	0.0633977	RPC11	TFIIS-like small Pol III subunit C11
YDR046C	0.0842695	0.858615	0.177225	0.234079	BAP3	Valine transporter
YDR047W	0.506328	0.0386016	0.0834425	0.58944	HEM12	uroporphyrinogen decarboxylase
YDR048C	-0.0519699	0.939863	0.432535	0.578341		questionable ORF
YDR049W	0.0280916	0.905779	-0.47451	0.107397		similarity to C.elegans K06H7.3 protein
YDR050C	1.54738	0.348987	0.61696	0.0507072	TPI1	triosephosphate isomerase
YDR051C	-0.687255	0.0195731	-0.455166	0.0769311		similarity to hypothetical A. thaliana protein BAC F7G19
YDR052C	0.844428	0.0151521	-0.140824	0.490476	DBF4	Regulatory subunit of Cdc7p-Dbf4p kinase complex
YDR053W	0.142878	0.812398	0.109235	0.783649		questionable ORF
YDR054C	0.0615616	0.79902	-0.0282834	0.750139	CDC34	ubiquitin-conjugating enzyme, E2
YDR055W	2.4454	0.357606	0.409644	0.284047	PST1	The gene product has been detected among the proteins secreted by regenerating protoplasts
YDR056C	0.591026	0.46636	0.0122538	0.924154		hypothetical protein
YDR057W	-0.145994	0.628561	-0.5295	0.00223604		weak similarity to L.lactis mleR protein
YDR058C	-0.668184	0.10053	-0.297029	0.105811	TGL2	Triglyceride Lipase
YDR059C	-0.0431858	0.880882	0.470068	0.258846	UBC5	ubiquitin-conjugating enzyme
YDR060W	1.32966	0.0655423	-0.548414	0.114803		similarity to mouse putative CCAAT binding factor CBF1 and CBF2
YDR061W	-0.0431802	0.918361	-0.36346	0.0219328		similarity to E.coli modF and photorepair protein phrA
YDR062W	0.867351	0.220325	0.195965	0.0164121	LCB2	Probable component of serine palmitoyltransferase, which catalyzes the first step in biosynthesis of long-chain sphingolipids
YDR063W	-0.760289	0.0398809	-0.0596505	0.413993		weak similarity to glia maturation factor beta
YDR064W	1.54223	0.05586	0.376038	0.0137648	RPS13	Ribosomal protein S13 (S27a) (YS15)
YDR065W	-0.438127	0.119434	-0.521338	0.0434275		hypothetical protein
YDR066C	0.514999	0.0394282	0.000641623	0.99616		similarity to hypothetical protein YER139c
YDR067C	0.403265	0.0627957	-0.264403	0.0385861		similarity to YNL099c
YDR068W	0.326557	0.440531	-0.943504	0.0556142	DOS2	involved in genome stability
YDR069C	-0.754229	0.0323646	0.00351103	0.9791	DOA4	ubiquitin isopeptidase
YDR070C	-3.89565	1.8649e-06	0.0191981	0.913523		hypothetical protein
YDR071C	0.326747	0.401315	-0.391782	0.281122		similarity to O.aries arylalkylamine N-acetyltransferase
YDR072C	0.901127	0.22785	0.513528	0.130325	IPT1	inositolphosphotransferase 1
YDR073W	0.46754	0.389194	-0.243728	0.126489	SNF11	component of SWI /SNF global transcription activator complex
YDR074W	-1.4608	0.00470109	0.238847	0.0140783	TPS2	Trehalose-6-phosphate phosphatase
YDR075W	1.02855	0.0655448	-0.152763	0.304873	PPH3	protein phosphatase type 2A
YDR076W	-0.205564	0.399191	-0.0982164	0.169139	RAD55	RecA homolog (related to DMC1, RAD51, RAD57), interacts with Rad51p and Rad57p by two-hybrid analysis
YDR077W	1.11285	0.0100288	0.818789	0.19132	SED1	putative cell surface glycoprotein
YDR078C	-0.3208	0.0810463	-0.363344	0.221385		hypothetical protein
YDR079W	0.205732	0.163786	-0.046736	0.462786	PET100	cytochrome c oxidase-specific assembly factor
YDR080W	0.138629	0.456489	-0.190779	0.239014	VPS41	component of vacuolar membrane protein complex
YDR081C	0.250673	0.0898941	-0.286045	0.0283432	PDC2	Asparagine and serine-rich protein
YDR082W	-0.798823	0.00739849	-0.822314	0.0256566	STN1	involved in telomere length regulation
YDR083W	1.04854	0.0568458	-0.571237	0.137129		nucleolar protein required for efficient processing of pre-rRNA at site A2; methyltransferase homolog
YDR084C	0.167841	0.463862	0.533642	0.0887124		similarity to hypothetical C.elegans protein
YDR085C	-0.265779	0.56482	-0.000240142	0.998782	AFR1	cytoskeletal protein, similar to arrestins
YDR086C	0.964724	0.108831	-0.325323	0.0174746	SSS1	endoplasmic reticulum protein that is part of the Sec61 trimeric complex and the Ssh1 trimeric complex
YDR087C	1.09303	0.0244594	-0.394419	0.116556	RRP1	involved in rRNA processing
YDR088C	-0.183966	0.0512589	-0.832094	0.0520654	SLU7	involved in mRNA splicing
YDR089W	-0.599709	0.00757822	0.225486	0.144845		weak similarity to Streptococcus transposase
YDR090C	-0.368182	0.400777	-0.0390525	0.306407		weak similarity to YRO2 protein
YDR091C	1.00521	0.0404465	-0.110892	0.282693	RLI1	putative member of nontransporter group of ATP-binding cassette (ABC) superfamily
YDR092W	0.131291	0.296037	0.126384	0.0382106	UBC13	ubiquitin-conjugating enzyme
YDR094W	0.551802	0.446126	0.829178	0.0585239		questionable ORF
YDR095C	0.55295	0.437717	0.397186	0.488728		hypothetical protein
YDR096W	-0.679109	0.0694753	0.177594	0.157278	GIS1	putative zinc finger protein ; repressor of PHR1 transcription
YDR097C	-0.224902	0.196624	-0.179176	0.124518	MSH6	Homolog of the human GTBP protein, forms a complex with Msh2p to repair both single-base and insertion-deletion mispairs, redundant with Msh3p in repair of insertion-deletion mispairs
YDR098C	0.785637	0.0319624	0.057283	0.294803	GRX3	Protein with glutaredoxin activity
YDR098C-A	0.457185	0.453335	-0.105164	0.112664		TyA gag protein. Gag processing produces capsid proteins.
YDR099W	-0.263519	0.295562	0.23463	0.20719	BMH2	member of conserved eukaryotic 14-3-3 gene family
YDR100W	0.668533	0.0258311	0.666594	0.058956		similarity to Dictyostelium development-specific membrane protein
YDR101C	1.53972	0.0248715	-0.222944	0.332744		weak similarity to proliferation-associated protein
YDR102C	0.462629	0.28287	-0.242142	0.546334		hypothetical protein
YDR103W	0.379394	0.374611	0.134405	0.312901	STE5	scaffold protein for MAP kinase cascade
YDR104C	0.00313741	0.990908	-0.244034	0.104449	SPO71	protein involved in spore wall formation
YDR105C	-0.609318	0.0333171	-0.0816592	0.662323		similarity to mouse hypothetical protein
YDR106W	-0.166923	0.371252	-0.332903	0.148264	ARP10	Actin-related protein
YDR107C	-0.340535	0.289033	0.264519	0.243671		strong similarity to Emp70 protein
YDR108W	0.31872	0.0661212	-0.433799	0.0394225	GSG1	involved in meiosis
YDR109C	-0.4856	0.100975	-0.308492	0.0994683		similarity to Mpa43p
YDR110W	0.051836	0.584636	-0.64503	0.0596193	FOB1	DNA replication fork blocking protein
YDR111C	-0.428854	0.155269	-0.148403	0.452166		strong similarity to alanine transaminase
YDR112W	-0.376129	0.0754298	-0.204694	0.347889		questionable ORF
YDR113C	0.67146	0.105227	-0.0682809	0.222902	PDS1	42-kDa nuclear protein
YDR114C	0.136467	0.4237	0.150744	0.0327118		questionable ORF
YDR115W	0.349321	0.123737	0.0533924	0.145181		similarity to bacterial ribosomal L34 proteins
YDR116C	0.552608	0.118753	-0.173352	0.0375139		similarity to bacterial ribosomal L1 proteins
YDR117C	0.0509651	0.364526	-0.384537	0.0589258		similarity to mouse ligatin, a trafficking receptor for phosphoglycoproteins
YDR118W	0.0520691	0.892867	-0.0613869	0.173089	APC4	subunit of the anaphase promoting complex (APC)
YDR119W	0.908003	0.0248144	0.396781	0.100717		similarity to B.subtilis tetracyclin resistance
YDR120C	0.270921	0.209366	-0.305215	0.0325262	TRM1	N2,N2-dimethylguanosine-specific tRNA methyltransferase
YDR121W	-0.1671	0.187619	-0.478276	0.147745	DPB4	DNA polymerase II (epsilon) 4th subunit
YDR122W	-0.852145	0.0264541	-0.103292	0.0824241	KIN1	Serine /threonine protein kinase
YDR123C	1.131	0.253807	0.163152	0.363718	INO2	helix-loop-helix protein
YDR124W	-0.622754	0.0240223	0.344402	0.167795		hypothetical protein
YDR125C	-0.318027	0.31488	0.0561089	0.590842	ECM18	(putative) involved in cell wall biogenesis
YDR126W	0.530524	0.173197	0.0590986	0.922764		similarity to hypothetical protein YLR246w and YOL003c
YDR128W	-0.464372	0.241837	-0.103247	0.511866		weak similarity to Sec27p, YMR131c and human retinoblastoma-binding protein
YDR129C	-0.323835	0.165664	0.13639	0.451243	SAC6	fibrim homolog (actin-filament bundling protein)
YDR130C	-0.132131	0.319845	-0.481032	0.0637132	FIN1	Cell cycle-dependent filament between nuclei
YDR131C	-0.201876	0.474654	-0.260348	0.0810784		similarity to hypothetical protein YJL149w
YDR132C	0.0982863	0.549918	-0.155236	0.227566		strong similarity to hypothetical protein YLR108c
YDR133C	0.0327104	0.667516	0.711886	0.0810568		questionable ORF
YDR134C	0.0806916	0.519429	1.08937	0.0643866		strong similarity to Flo1p, Flo5p, Flo9p and YLR110c
YDR136C	0.195266	0.428397	0.587254	0.447141		questionable ORF
YDR137W	-0.117226	0.575914	-0.56682	0.0448249	RGP1	involved in mitotic growth
YDR138W	0.763976	0.213265	0.0103095	0.946484	HPR1	involved in mitosis, recombination ; similar to TOP1 across 2 regions
YDR139C	0.359107	0.0663223	-0.197844	0.249251	RUB1	ubiquitin-like protein
YDR140W	0.818987	0.0354017	0.129217	0.218493		putative methyltransferase
YDR141C	-0.023702	0.906758	0.186692	0.0354253	DOP1	homolog of Emericella nidulans developmental regulatory gene, dopey (dopA).
YDR142C	0.117964	0.554428	0.342528	0.110623	PEX7	Member of beta-transducin-related (WD-40) protein family
YDR143C	0.355745	0.348023	0.422566	0.0262358	SAN1	(putative) transcriptional regulator
YDR144C	1.7162	0.111578	0.507793	0.0558965	MKC7	aspartyl protease related to Yap3p
YDR145W	0.233032	0.201739	-0.42885	0.0757267	TAF61	TFIID subunit
YDR146C	0.716935	0.186514	-0.21882	0.496211	SWI5	transcriptional activator
YDR147W	-0.131588	0.634671	-0.325368	0.160316	EKI1	Ethanolamine Kinase
YDR148C	-2.06296	0.000822137	-0.0137897	0.911548	KGD2	dihydrolipoyl transsuccinylase component of alpha-ketoglutarate dehydrogenase complex in mitochondria
YDR149C	0.305613	0.711624	0.0610904	0.891792		questionable ORF
YDR151C	0.353662	0.109943	0.00623172	0.935457	CTH1	member of the CCCH zinc finger protein family that has two or more repeats of a novel zinc finger motif consisting of Cys and His residues in the form Cx8Cx5Cx3H [where x is a variable amino acid (aa)]
YDR152W	0.774442	0.0236216	-0.320451	0.361992		weak similarity to C.elegans hypothetical protein CET26E3
YDR153C	0.11233	0.461352	-0.312763	0.147898		hypothetical protein
YDR154C	0.150409	0.699002	0.544554	0.205803		questionable ORF
YDR156W	1.31535	0.13318	0.811024	0.0120428	RPA14	RNA polymerase I subunit A14
YDR157W	1.00752	0.202575	0.655446	0.0274221		questionable ORF
YDR158W	1.19084	0.172632	0.0739718	0.529116	HOM2	aspartic beta semi-aldehyde dehydrogenase
YDR159W	0.378374	0.274138	-0.331874	0.145123	SAC3	Leucine permease transcriptional regulator
YDR160W	-0.366636	0.0440514	-0.201567	0.0084845	SSY1	regulator of transporters
YDR161W	0.689023	0.0216461	-0.221977	0.0528759	TCI1	interacts with PP2C
YDR162C	0.26971	0.242356	-0.450901	0.0297415	NBP2	interacts with Nap1, which is involved in histone assembly
YDR163W	-0.0263428	0.84286	-0.492281	0.0455368		weak similarity to S.pombe hypothetical protein
YDR164C	-0.426799	0.134417	-0.122895	0.266176	SEC1	(putative) SNARE docking complex subunit
YDR165W	0.831942	0.105674	-0.240363	0.236332		weak similarity to hypothetical C.elegans protein
YDR166C	0.109541	0.638297	0.0405734	0.810919	SEC5	107 kDa component of the Exocyst complex ; required for exocytosis.
YDR167W	0.0809004	0.511272	-0.287422	0.0819158	TAF25	TFIID subunit
YDR168W	-0.170265	0.43779	-0.710859	0.0322653	CDC37	(putative) chaperone, involved in spindle pole body duplication and passage through START
YDR169C	-0.360415	0.213579	0.18584	0.0477866	STB3	Sin3 binding protein
YDR170C	-0.325099	0.117715	0.0245123	0.767551	SEC7	Guanine nucleotide exchange protein for ARF
YDR171W	-1.38993	0.00932314	0.109623	0.420883	HSP42	heat shock protein similar to HSP26, involved in cytoskeleton assembly
YDR172W	0.468661	0.0712191	0.129688	0.346523	SUP35	translation termination factor eRF3
YDR173C	-0.494121	0.0278659	-0.261397	0.147287	ARG82	dual-specificity inositol 1,4,5-trisphosphate 6-kinase /inositol 1,4,5,6-tetrakisphosphate 3-kinase (IP3 6- /IP4 3-kinase)
YDR174W	-0.182122	0.0496965	-0.301214	0.0880566	HMO1	35 kDa protein belonging to the high mobility group (HMG) fanily of proteins
YDR175C	0.364196	0.310632	-0.371693	0.0952416	RSM24	protein of the small subunit of the mitochondrial ribosome
YDR176W	0.683706	0.104	-0.598928	0.0499706	NGG1	transcription factor ; genetic and mutant analyses suggest that Ngg1p (Ada3p) is part of two transcriptional adaptor /HAT (histone acetyltransferase complexes, the 0.8 MD ADA complex and the 1.8 MD SAGA complex
YDR177W	0.0936525	0.459346	-0.269911	0.102214	UBC1	ubiquitin-conjugating enzyme
YDR178W	-0.919819	0.0113742	0.818077	0.119593	SDH4	succinate dehydrogenase membrane anchor subunit
YDR179C	-0.338389	0.202182	-0.781298	0.00751141		hypothetical protein
YDR179W-A	0.410785	0.296013	-0.159006	0.0286461		hypothetical protein
YDR180W	0.479893	0.243995	0.0958822	0.35414	SCC2	Sister chromatid cohesion protein
YDR181C	-0.42655	0.0412631	-0.972099	0.0321137	SAS4	involved in silencing at telomeres, HML, and HMR
YDR182W	-0.195762	0.109494	-0.0731975	0.0186631	CDC1	involved in ion homeostasis
YDR183W	0.183152	0.395114	-0.648404	0.0322059	PLP1	Phosducin-Like Protein
YDR184C	1.51442	0.0458339	-0.213405	0.34861	ATC1	nuclear protein that interacts with Aip3
YDR185C	0.534087	0.192846	0.301054	0.00810107		strong similarity to Msf1p
YDR186C	-0.253128	0.00247766	-0.351094	0.004445		hypothetical protein
YDR187C	0.0847612	0.549221	-0.00217204	0.989659		questionable ORF
YDR188W	-0.00836729	0.956367	-0.274295	0.0238655	CCT6	component of cytoplasmic chaperonin complex
YDR189W	0.364243	0.0793637	-0.0747526	0.485834	SLY1	SNARE docking complex subunit
YDR190C	0.584539	0.0316312	-0.274324	0.0672368	RVB1	RUVB-like protein
YDR191W	0.184328	0.23349	0.160522	0.0317245	HST4	similar to nuclear lamins, involved in telomeric silencing
YDR192C	0.18476	0.473841	0.129062	0.0297658	NUP42	42-kD protein associated with nuclear pore complexes ; Nup42p is structurally related to the FG-nucleoporin family of pore proteins
YDR193W	0.0539255	0.863113	0.454128	0.00383155		questionable ORF
YDR194C	0.551315	0.0656728	-0.994976	0.00185822	MSS116	Mitochondrial DEAD box RNA helicase
YDR195W	0.284667	0.0172403	-0.0856272	0.40004	REF2	RNA-binding protein, involved in mRNA processing
YDR196C	-0.46682	0.0100612	-0.244272	0.342648		similarity to C.elegans hypothetical protein T05G5.5
YDR197W	0.487826	0.0763009	-0.174543	0.363208	CBS2	cytochrome b translational activator
YDR198C	0.378228	0.0276304	-0.554916	0.027999		hypothetical protein
YDR199W	-0.186527	0.384536	0.180007	0.455896		questionable ORF
YDR200C	-0.0858132	0.622795	-0.360476	0.168756		similarity to hypothetical protein YLR238w
YDR201W	0.398434	0.391371	-0.351576	0.0873293	SPC19	component of spindle pole
YDR202C	-0.708585	0.0127269	-0.184353	0.517385	RAV2	Regulator of (H+)-ATPase in Vacuolar membrane
YDR203W	-0.724251	0.0325101	0.0130055	0.941996		questionable ORF
YDR204W	-1.0497	0.00219414	0.0216772	0.766219	COQ4	involved in ubiquinone biosynthesis
YDR205W	-0.627079	0.0232734	0.536149	0.113934	MSC2	similarity to A.eutrophus cation efflux system membrane protein czcD, rat zinc transport protein ZnT-1 and Cot1p
YDR206W	0.252226	0.0654598	-0.211592	0.388503	EBS1	similar to Est1, which is a putative component of telomerase
YDR207C	0.0511111	0.81134	0.106119	0.454731	UME6	Ume6p is a C6 zinc finger URS1-binding protein.
YDR208W	-0.0185368	0.910557	0.0360986	0.478207	MSS4	Phosphatidylinositol 4-phosphate kinase
YDR209C	0.391375	0.0846743	-0.356587	0.205906		questionable ORF
YDR210W	0.698904	0.0416869	-0.332239	0.063543		strong similarity to hypothetical protein YBR016w
YDR210W-C	0.882189	0.0403378	0.428006	0.0388735		TyA gag protein. Gag processing produces capsid proteins.
YDR211W	0.343048	0.258746	-0.557836	0.00206436	GCD6	Translation initiation factor eIF-2B epsilon subunit
YDR212W	-0.0964064	0.41091	0.0151927	0.885296	TCP1	chaperonin subunit alpha
YDR213W	0.751035	0.172301	-0.150165	0.179574	UPC2	zinc finger transcription factor of the Zn(2)-Cys(6) binuclear cluster domain type
YDR214W	-0.708541	0.00138108	-0.0635054	0.879967		similarity to hypothetical protein YNL281w
YDR215C	-0.00850754	0.979127	1.30914	0.207866		hypothetical protein
YDR216W	-1.44966	0.00547645	0.174957	0.412638	ADR1	positive transcriptional regulator of ADH2 and peroxisomal protein genes
YDR217C	0.0593971	0.589834	-0.742677	0.0703095	RAD9	cell cycle arrest protein
YDR218C	-0.325545	0.205048	0.378347	0.293047	SPR28	septin-related protein expressed during sporulation
YDR219C	-0.806769	0.0262497	-0.512237	0.0911536		hypothetical protein
YDR220C	-0.539718	0.0253596	0.292217	0.348142		questionable ORF
YDR221W	-0.0400647	0.840322	0.147798	0.26872		weak similarity to the beta subunit of an ER luminal alpha-glucosidase from mouse
YDR222W	0.0531609	0.878763	0.171868	0.129765		strong similarity to hypothetical protein YLR225c
YDR223W	-0.460735	0.433384	0.353905	0.159734		similarity to Ifh1p
YDR224C	0.536037	0.141298	0.256358	0.14928	HTB1	Histone H2B (HTB1 and HTB2 code for nearly identical proteins)
YDR225W	1.37577	0.202826	0.184118	0.251632	HTA1	Histone H2A (HTA1 and HTA2 code for nearly identical proteins)
YDR226W	1.23819	0.331894	0.186896	0.251224	ADK1	adenylate kinase
YDR227W	-0.323636	0.357081	-0.34778	0.145214	SIR4	regulator of silencing at HML, HMR, and telomeres
YDR228C	0.257017	0.115703	-0.128278	0.24137	PCF11	Component of pre-mRNA cleavage and polyadenylation factor I
YDR229W	0.088471	0.57133	-0.0923247	0.606678		hypothetical protein
YDR230W	-0.499568	0.10537	0.339417	0.506439		questionable ORF
YDR231C	-0.986079	0.0172325	0.1141	0.618974	COX20	protein required for maturation and assembly of cytochrome oxidase subunit II
YDR232W	0.132023	0.809325	0.645044	0.074157	HEM1	5-aminolevulinate synthase
YDR233C	0.748019	0.070131	0.818308	0.0404955		similarity to hypothetical protein YDL204w
YDR234W	0.731367	0.201243	-0.117592	0.314128	LYS4	homoaconitase
YDR236C	-1.03022	0.000134445	0.219187	0.100943	FMN1	Riboflavin kinase
YDR237W	0.416781	0.182773	0.547328	0.00109392	MRPL7	Mitochondrial ribosomal protein MRPL7 (YmL7)
YDR241W	-0.150639	0.830175	0.040882	0.216249		questionable ORF
YDR242W	0.565743	0.379052	-0.195786	0.130202	AMD2	putative amidase
YDR243C	0.878941	0.0415088	0.470214	0.0162512	PRP28	RNA helicase
YDR244W	0.361208	0.357312	-0.224246	0.291128	PEX5	69-kDa protein containing tetratricopeptide repeat (TPR)
YDR245W	0.47693	0.195283	-0.389771	0.0618861	MNN10	galactosyltransferase
YDR246W	-0.276732	0.037569	0.0933562	0.225864	TRS23	TRAPP subunit of 23 kDa
YDR247W	-2.21957	0.00129713	0.51901	0.0745895		strong similarity to Sks1p
YDR249C	0.499549	0.218358	0.0932694	0.0421745		weak similarity to cytochrome b
YDR250C	0.154553	0.73885	0.0984729	0.42265		hypothetical protein
YDR251W	-0.0074713	0.979865	-0.158048	0.107042	PAM1	multicopy suppressor of protein phosphatase 2A
YDR252W	0.20915	0.324686	-0.179917	0.220846	BTT1	negative regulator of RNA polymerase II
YDR253C	0.144438	0.784901	0.230478	0.163722	MET32	zinc finger DNA binding factor, transcriptional regulator of sulfur amino acid metabolism, highly homologous to Met31p
YDR254W	-0.465435	0.00714892	0.0441639	0.718874	CHL4	chromosome segregation protein
YDR255C	-0.555279	0.064055	-0.0770989	0.0592631		weak similarity to hypothetical S.pombe hypothetical protein SPBC29A3
YDR256C	-0.0474021	0.913361	0.183706	0.288704	CTA1	catalase A
YDR257C	0.451751	0.112801	-0.572866	0.0953662	RMS1	(putative) transcriptional regulator
YDR258C	-1.38848	0.00401774	-0.563416	0.00669006	HSP78	Mitochondrial heat shock protein 78 kDa
YDR259C	-0.0161228	0.9025	0.0944237	0.475097	YAP6	basic leucine zipper transcription factor
YDR260C	0.0393155	0.819934	-0.061991	0.377639	SWM1	Spore Wall Maturation 1
YDR261C	1.11714	0.138929	0.506724	0.0931098	EXG2	Exo-1,3-b-glucanase
YDR262W	-0.756603	0.13529	0.0845415	0.209037		hypothetical protein
YDR263C	0.83456	0.035583	0.340294	0.278618	DIN7	involved in DNA repair
YDR264C	0.408084	0.348165	0.0208724	0.647954	AKR1	Ankyrin repeat-containing protein
YDR265W	-0.0350316	0.893875	-0.293687	0.0559039	PEX10	C3HC4 zinc-binding integral peroxisomal membrane protein
YDR266C	0.571159	0.044005	0.0378479	0.795088		similarity to hypothetical C.elegans protein
YDR267C	0.473846	0.0958871	-0.00794973	0.848112		weak similarity to human TAFII100 and other WD-40 repeat containing proteins
YDR268W	0.628362	0.220142	-0.258907	0.0509993	MSW1	mitochondrial tryptophanyl-tRNA synthetase
YDR269C	-0.377699	0.366155	-0.302964	0.208559		questionable ORF
YDR270W	-0.331184	0.379536	0.147805	0.398332	CCC2	Cu(2+)-transporting ATPase
YDR271C	-0.119866	0.609725	0.725267	0.0189154		questionable ORF
YDR272W	-0.927846	0.00327652	-0.326803	0.0324557	GLO2	Cytoplasmic glyoxylase-II
YDR273W	-1.09202	0.00583901	-0.156178	0.410818		weak similarity to YOR042w
YDR274C	0.092589	0.101726	0.00893408	0.938715		hypothetical protein
YDR275W	-1.07342	0.00308215	-0.625282	0.0237153		weak similarity to YOR042w
YDR276C	0.252066	0.448809	0.792065	0.122317	PMP3	hypothetical transmembrane protein
YDR277C	-0.469894	0.360348	0.068365	0.545019	MTH1	Protein is 61 % identical to Msn3p
YDR278C	0.225176	0.658317	1.29414	0.0946834		hypothetical protein
YDR279W	0.211506	0.0937125	-0.290723	0.114961		hypothetical protein
YDR280W	0.940828	0.146813	-0.39085	0.132024	RRP45	Putative 3'->5' exoribonuclease ; component of exosome complex of 3'->5' exonucleases
YDR281C	-3.09108	1.65893e-05	0.426485	0.562081	PHM6	phosphate metabolism ; transcription is regulated by PHO system
YDR282C	-0.799888	0.0165913	-0.47214	0.000400624		similarity to hypothetical protein YDL001w, YFR048w and S.pombe hypothetical protein SPAC12G12.14
YDR283C	0.200149	0.342109	0.44265	0.310736	GCN2	eukaryotic initiation factor 2 alpha (eIF2-alpha) kinase
YDR284C	-0.537462	0.132445	0.389523	0.246834	DPP1	Diacylglycerol Pyrophosphate Phosphatase
YDR285W	-0.0795878	0.867106	-0.240984	0.426064	ZIP1	synaptonemal complex protein
YDR286C	0.0310688	0.782637	-0.319559	0.0394333		hypothetical protein
YDR287W	-0.425677	0.0843712	-0.0173027	0.823927		similarity to inositolmonophosphatases
YDR288W	-1.08741	0.00264461	-0.63339	0.0972269		hypothetical protein
YDR289C	-0.146253	0.497268	-0.872012	0.00916851	RTT103	regulator of Ty1 Transposition
YDR290W	0.10988	0.822957	0.425123	0.350044		questionable ORF
YDR291W	0.0771892	0.378369	-0.402537	0.0279164		similarity to B.subtilis helicases
YDR292C	0.367807	0.0815501	-0.231562	0.143617	SRP101	signal recognition particle receptor - alpha subunit
YDR293C	-0.601965	0.0357847	0.301959	0.221714	SSD1	putative protein phosphatase//involved in the tolerance to high concentration of Ca2+
YDR294C	-0.391846	0.0314423	0.0579969	0.665177	DPL1	dihydrosphingosine phosphate lyase (also known as sphingosine phosphate lyase)
YDR295C	0.203226	0.441539	-0.399218	0.0279282	PLO2	Ploidy-related
YDR296W	0.643291	0.115802	-0.144797	0.281708	MHR1	Involved in mitochondrial homologous DNA recombination
YDR297W	0.609402	0.487078	0.592441	0.0210468	SUR2	Syringomycin response protein 2
YDR298C	-1.02441	0.0153045	0.190312	0.313489	ATP5	ATP synthase subunit 5 ; oligomycin sensitivity-conferring protein
YDR299W	1.03961	0.0721903	-0.755654	0.0679558	BFR2	involved in secretion
YDR300C	0.823041	0.19509	-0.220848	0.0103029	PRO1	gamma-glutamyl kinase
YDR302W	0.128073	0.594957	0.162194	0.00205564	GPI11	GPI-phosphoethanolamine transferase Gpi7p subunit
YDR303C	-0.269966	0.110533	0.0124181	0.855231	RSC3	Zinc cluster protein
YDR304C	0.15114	0.101124	0.505478	0.0260076	CYP5	Cyclophilin D, Peptidyl-prolyl cis-trans isomerase D
YDR305C	-0.256341	0.0169228	-0.16241	0.212747	HNT2	member of the histidine triad family
YDR306C	-0.971625	0.00953057	-0.327651	0.128723		weak similarity to S.pombe hypothetical protein SPAC6F6
YDR307W	-0.386858	0.0849455	0.344183	0.160605		similarity to Pmt1p, Pmt2p, Pmt3p and Pmt5p
YDR308C	0.497382	0.158787	-0.396867	0.17316	SRB7	RNA polymerase II holoenzyme component
YDR309C	1.30927	0.162511	0.405386	0.0829886	GIC2	Cdc42 binding protein, involved in bud emergence
YDR310C	-0.00509228	0.990256	-0.0284637	0.741946	SUM1	nuclear protein involved in silencing
YDR311W	0.202367	0.519869	-0.540613	0.083301	TFB1	Component of transcription initiation factor IIb, 75 kDa subunit
YDR312W	0.917174	0.0210818	-0.704817	0.0667512	SSF2	possibly involved in mating
YDR313C	-0.726714	0.036109	-0.0682632	0.337158	PIB1	phosphatidylinositol(3)-phosphate binding protein
YDR314C	-0.735949	0.00397724	-0.48086	0.00803462		weak similarity to hypothetical S.pombe protein
YDR315C	0.090201	0.788193	-0.369531	0.08035	IPK1	inositol 1,3,4,5,6-pentakisphosphate 2-kinase (IP5 2-kinase)
YDR316W	0.635431	0.0555494	-0.681187	0.0547379		putative methyltransferase
YDR316W-A	1.14477	0.193496	0.382735	0.00826651		TyA gag protein. Gag processing produces capsid proteins.
YDR317W	0.340156	0.381329	-0.0997456	0.0130969		hypothetical protein
YDR318W	0.32363	0.223664	-0.13669	0.264594	MCM21	involved in minichromosome maintenance
YDR319C	-0.101837	0.650294	0.0808018	0.523796		hypothetical protein
YDR320C	-0.30131	0.576405	-0.0283644	0.696306	SWA2	Auxilin-like protein
YDR321W	0.443949	0.343357	0.0513343	0.575698	ASP1	Asparaginase I, intracellular isozyme
YDR322C-A	-0.906901	0.00467736	-0.0152358	0.884402	TIM11	subunit e of mitochondrial F1F0-ATPase
YDR322W	0.624213	0.244572	-0.123886	0.21479	MRPL35	Mitochondrial ribosomal protein MRPL35 (YmL35)
YDR323C	-0.706405	0.0108053	-0.239111	0.171379	PEP7	cytosolic and peripheral membrane protein with three zinc fingers ; cysteine rich regions of amino acids are essential for function
YDR324C	1.29656	0.0498869	-0.589719	0.0435387		weak similarity to beta transducin from S. pombe and other WD-40 repeat containing proteins
YDR325W	-0.157775	0.238749	-0.586958	0.122743	YCG1	Yeast Condensin G
YDR326C	0.776968	0.0212544	0.387259	0.134077		strong similarity to YHR080c, similarity to YFL042c and YLR072w
YDR327W	0.0320509	0.662295	0.234814	0.284606		questionable ORF
YDR328C	-0.130018	0.331862	0.0830102	0.456339	SKP1	Skp1p encodes Cbf3d, a 29 Kd kinetochore protein subunit of CBF3 -- a complex which binds to the CDE III element of centromeres. Skp1p is also a subunit of the SculCdc4 (also termed SCFCdc4p) complex. SculCdc4 transfers ubiquitin to phosphorylated Sic1p an
YDR329C	-0.445462	0.0879307	-0.0817962	0.00982985	PEX3	48-kDa peroxisomal integral membrane protein
YDR330W	-0.635156	0.0234675	-0.328052	0.226711		similarity to hypothetical S. pombe protein
YDR331W	0.441427	0.104994	0.26228	0.0937927	GPI8	(putative) transamidase involved in GPI anchor attachment
YDR332W	-0.158491	0.486517	-0.443354	0.0370846		similarity to E.coli hypothetical protein and weak similarity to RNA helicase MSS116 / YDR194c
YDR333C	0.354559	0.0690615	-0.452364	0.0584207		similarity to hypothetical S. pombe protein
YDR334W	1.18004	0.0209055	-0.788725	0.0371201	SWR1	DEAH-box protein, putative RNA helicase
YDR335W	-0.383399	0.00194727	-0.0668495	0.535267	MSN5	member of major facilitator superfamily, involved in pheromone response
YDR336W	-0.67074	0.00668861	-0.384169	0.0365386		weak similarity to B.subtilis hypothetical protein X
YDR337W	-0.02323	0.882533	-0.70098	0.0369933	MRPS28	Mitochondrial ribosomal protein MRPS28 (E. coli S15)
YDR338C	-0.278601	0.336051	0.297021	0.161556		similarity to Erc1p
YDR339C	0.77874	0.0528276	-0.219558	0.380283		weak similarity to hypothetical protein YOR004w
YDR340W	0.124891	0.456854	-0.0390966	0.763899		questionable ORF
YDR341C	0.807918	0.0695294	-0.234887	0.0244633		arginyl-tRNA synthetase, cytosolic
YDR342C	-0.98567	0.131107	0.62447	0.132175	HXT7	Hexose transporter
YDR343C	-0.906827	0.168627	0.474054	0.143027	HXT6	Hexose transporter
YDR344C	0.536321	0.355207	0.814114	0.0891543		hypothetical protein
YDR345C	1.27901	0.287016	0.664695	0.123902	HXT3	Low-affinity glucose transporter
YDR346C	-0.0161739	0.944133	-0.73127	0.0297092		similarity to hypothetical S.pombe protein
YDR347W	0.329248	0.19397	-0.066496	0.590825	MRP1	37 kDa mitochondrial ribosomal protein
YDR348C	0.583406	0.00296624	0.015082	0.840339		similarity to hypothetical protein YHR097c
YDR349C	0.623693	0.151051	0.434266	0.0840432	YPS7	GPI-anchored aspartic protease
YDR350C	-0.183472	0.364505	-0.214456	0.0271992	TCM10	protein of unknown function
YDR351W	0.820881	0.113364	-0.125761	0.10986	SBE2	involved in bud growth
YDR352W	-0.381167	0.11426	0.154681	0.403932		weak similarity to hypothetical proteins YOL092w, YBR147w and YMR010w
YDR353W	0.792032	0.331432	0.232833	0.314187	TRR1	Thioredoxin reductase
YDR354W	0.481822	0.145146	0.224272	0.135231	TRP4	anthranilate phosphoribosyl transferase
YDR355C	-0.106572	0.818878	4.36811	0.417155		questionable ORF
YDR356W	0.0356008	0.878505	-0.702036	0.0608639	NUF1	component of the spindle pole body that interacts with Spc42p, calmodulin, and a 35 kDa protein
YDR357C	-0.567228	0.0546117	-0.405202	0.00172474		hypothetical protein
YDR358W	-1.44976	0.00177038	-0.309081	0.0889956	GGA1	Arf-binding protein
YDR360W	0.595875	0.410371	0.575656	0.125327		questionable ORF
YDR361C	0.838338	0.0193119	-0.444068	0.10562		hypothetical protein
YDR362C	-0.384314	0.0163609	-0.335718	0.0151314	TFC6	91 kDa tau91 subunit of transcription factor IIIC (TFIIIC)
YDR363W	-0.233868	0.532169	-0.618752	0.0584989	ESC2	establishes silent chromatin
YDR363W-A	0.545357	0.0607346	-0.496687	0.110229	SEM1	unknown function, similar to S. pombe Dss1
YDR364C	0.0116966	0.878879	-0.501209	0.0446834	CDC40	Member of the beta transducin family
YDR365C	0.921986	0.14645	-0.921464	0.0479301		weak similarity to Streptococcus M protein
YDR365W-A	0.915508	0.0106187	0.442577	0.0219535		TyA gag protein. Gag processing produces capsid proteins.
YDR366C	0.326796	0.379091	0.0709295	0.437582		similarity to YOL106w and YER181c
YDR367W	0.147462	0.731313	0.159443	0.081987		hypothetical protein
YDR368W	-1.51819	0.000864158	0.321163	0.263064	YPR1	similar to aldo-keto reductase
YDR369C	-0.570798	0.02907	-0.400264	0.0944363	XRS2	DNA repair protein
YDR370C	0.801675	0.0463405	-0.262082	0.231859		hypothetical protein
YDR371W	0.499616	0.258224	-0.32572	0.245528		similarity to chitinases
YDR372C	0.111794	0.699509	-0.412332	0.0190028		similarity to hypothetical S. pombe protein
YDR373W	0.602253	0.0299693	-0.141118	0.016049	FRQ1	regulator of phosphatidylinositol-4-OH kinase protein
YDR374C	0.392982	0.522876	0.417978	0.236249		similarity to hypothetical A. thaliana protein BAC F21M12
YDR375C	0.686482	0.183395	-0.168728	0.0863687	BCS1	Mitochondrial ATPase (AAA family)
YDR376W	0.0585797	0.834083	-0.386213	0.00407467	ARH1	adrenodoxin oxidoreductase homolog
YDR377W	-0.820276	0.00178185	-0.179383	0.43855	ATP17	ATP synthase subunit f
YDR378C	0.378922	0.0693424	0.0840707	0.184027	LSM6	Sm-like protein
YDR379W	0.268734	0.59135	-0.176475	0.148869	RGA2	Contains a Rho-GAP domain and two LIM domains. Has strong similarity to Rga1p. Has some similarity to all known Rho-GAPs.
YDR380W	-1.22153	0.0363281	0.509794	0.138237		similarity to Pdc6p, Thi3p and to pyruvate decarboxylases
YDR381W	0.529997	0.32429	0.025198	0.781748	YRA1	Nuclear RNA-binding RNA annealing protein
YDR382W	2.22028	0.0666899	0.428438	0.00375093	RPP2B	Ribosomal protein P2B (YP2beta) (L45)
YDR383C	0.485442	0.1538	-0.20586	0.135545		weak similarity to S.pombe paramyosin
YDR384C	1.43603	0.151595	0.61072	0.0219826		strong similarity to Y.lipolytica GPR1 gene
YDR385W	1.30844	0.173033	0.263455	0.425145	EFT2	translation elongation factor 2 (EF-2)
YDR386W	-0.331831	0.0895078	-0.714809	0.0242985	MUS81	involved in DNA repair, interacts with Rad54
YDR387C	-0.161192	0.556279	0.13377	0.37851		similarity to Itr1p and Itr2p and E.coli araE
YDR388W	-0.490689	0.122429	0.153938	0.16099	RVS167	(putative) cytoskeletal protein
YDR389W	0.348362	0.180599	0.402057	0.0713492	SAC7	GTPase activating protein (GAP) for RHO1
YDR390C	0.386032	0.0777346	-0.110015	0.495537	UBA2	similar to ubiquitin activating enzyme (E1)
YDR391C	0.110658	0.839099	-0.0122116	0.713845		transcriptional activator//general transcriptional adaptor or co-activator
YDR392W	-0.284874	0.0909968	-0.58452	0.0107637	SPT3	transcription factor, member of the histone acetyltransferase SAGA complex
YDR393W	-1.19064	0.00180723	0.823266	0.0613937	SHE9	similar to Arabidopsis Cip1, lethal when overexpressed
YDR394W	0.13315	0.663961	0.0191996	0.384323	RPT3	ATPase (AAA family) component of the 26S proteasome complex
YDR395W	1.13161	0.0583418	0.211052	0.0605656	SXM1	Sxm1p shares similarity with Cse1p homologs including Nmd5p, Cse1p, Lph2p, and the human cellular apoptosis susceptibility protein, CAS1 ; Sxm1p also shares homology with the karyopherin, Kap95p ; Sxm1p is primarily a nuclear protein
YDR396W	0.367177	0.32808	0.0702629	0.622673		hypothetical protein
YDR397C	0.343756	0.188836	-0.372482	0.161742	NCB2	repressor of class II transcription
YDR398W	0.801515	0.0497379	0.142476	0.31208		similarity to human KIAA0007 gene
YDR399W	1.16383	0.0966826	-0.0291274	0.788195	HPT1	hypoxanthine guanine phosphoribosyltransferase
YDR400W	-0.0663495	0.808108	0.151165	0.295516	URH1	uridine nucleosidase (uridine ribohydrolase) ; EC 3.2.2.3
YDR401W	0.163634	0.570724	0.223096	0.426995		questionable ORF
YDR402C	0.219066	0.603983	-0.105495	0.347334	DIT2	Cytochrome P450 56, Dit2p catalyzes oxidation of N-formyl tyrosine to N,N-bisformyl dityrosine in vitro
YDR403W	-0.35188	0.0095362	-0.0679728	0.72449	DIT1	first enzyme in dityrosine synthesis in the outer layer of the spore wall pathway converting L-tyrosine to N-formyl-L-tyrosine, expressed late (10-16 hr) in sporulation
YDR404C	0.700787	0.0381325	0.314225	0.057113	RPB7	dissociable subunit of RNA polymerase II
YDR405W	0.40787	0.369789	0.353183	0.2041	MRP20	263-amino acid mitochondrial ribosomal large subunit protein ; similar to L23 family of ribosomal proteins
YDR407C	0.0993837	0.4315	-0.0190364	0.885642	TRS120	Component of targeting complex (TRAPP) involved in ER to Golgi membrane traffic
YDR408C	0.908706	0.202446	0.210421	0.173451	ADE8	glycinamide ribotide transformylase
YDR410C	0.905684	0.23607	0.542633	0.0811606	STE14	farnesyl cysteine-carboxyl methyltransferase
YDR411C	0.227379	0.160111	0.453363	0.145695		weak similarity to Der1p
YDR412W	0.200788	0.257765	-0.694061	0.0384299		questionable ORF
YDR413C	0.0443233	0.789134	-0.711652	0.0520763		weak similarity to NADH dehydrogenase
YDR414C	0.126965	0.460111	0.0749522	0.401227	ERD1	involved in rentention of lumenal ER proteins
YDR415C	0.236646	0.50824	0.211067	0.163499		strong similarity to bacterial leucyl aminopeptidase
YDR416W	0.191921	0.148751	-0.395997	0.0177267	SYF1	(putative) involved in cell cyle ; similar to Drosophila crooked neck
YDR417C	0.109012	0.705458	0.105567	0.0492785		questionable ORF
YDR418W	0.718619	0.0367941	0.0391315	0.493819	RPL12B	Ribosomal protein L12B (L15B) (YL23)
YDR421W	-0.691831	0.0952786	-0.333094	0.0230309		hypothetical protein
YDR422C	-0.328868	0.0530696	0.243061	0.22607	SIP1	SNF1 protein kinase substrate
YDR423C	-0.325001	0.161245	0.122154	0.147334	CAD1	basic leucine zipper transcription factor
YDR425W	-0.30617	0.248472	-0.0736264	0.448724		similarity to hypothetical protein YDL113c
YDR427W	0.171986	0.622926	-0.374314	0.0846513	RPN9	Subunit of the regulatory particle of the proteasome
YDR428C	-0.357322	0.133073	-0.341551	0.01145		hypothetical protein
YDR429C	0.427039	0.115919	-0.748842	0.0331479	TIF35	translation initiation factor eIF3 subunit
YDR430C	0.557951	0.205644	-0.600753	0.0704395		similarity to C.perfringens hypothetical hypA protein
YDR431W	0.785073	0.0251778	-0.129719	0.433408		questionable ORF
YDR432W	0.377713	0.495764	-0.464364	0.359797	NPL3	nuclear shuttling protein with an RNA recognition motif
YDR433W	-0.0691753	0.865331	-0.127729	0.476396		questionable ORF
YDR434W	-0.0802415	0.672738	-0.0594755	0.0864858		similarity to S.pombe hypothetical protein
YDR435C	-0.802632	0.034532	-0.214719	0.0285394	PPM1	carboxy methyl transferase for protein phosphatase 2A catalytic subunit
YDR436W	-0.311764	0.466622	0.439937	0.179122	PPZ2	serine-threonine phosphatase Z
YDR437W	1.41436	0.220805	0.617354	0.0426703		hypothetical protein
YDR438W	3.22028	0.309584	0.568504	0.103735		strong similarity to hypothetical protein YML018c
YDR439W	-0.448123	0.0833868	-0.333787	0.0498152	LRS4	involved in rDNA silencing
YDR440W	0.243719	0.391653	-0.453565	0.020699	DOT1	involved in meiosis and transcriptional silencing
YDR441C	0.649793	0.0121374	0.988321	0.121491	APT2	Adenine Phosphoribosyltransferase
YDR442W	0.326767	0.078852	0.357902	0.090504		questionable ORF
YDR443C	-0.337142	0.0909169	0.31259	0.0196424	SSN2	transcription factor
YDR444W	0.0780007	0.696797	-0.339611	0.0409051		lipase family protein containing serine active site
YDR445C	0.0500145	0.845455	0.403478	0.018695		questionable ORF
YDR446W	0.356962	0.545919	-0.537439	0.317538	ECM11	(putative) involved in cell wall biogenesis
YDR447C	1.05512	0.0899873	-0.489945	0.0848943	RPS17B	Ribosomal protein S17B (rp51B)
YDR448W	0.731821	0.0825154	0.365852	0.0272642	ADA2	transcription factor, member of ADA and SAGA, two transcriptional adaptor /HAT (histone acetyltransferase)complexes
YDR449C	1.57268	0.113073	-0.653007	0.135023		hypothetical protein
YDR450W	1.32953	0.0473704	-0.0734093	0.687153	RPS18A	Ribosomal protein S18A
YDR451C	0.640064	0.211872	0.381901	0.0415033		strong similarity to Yox1p
YDR452W	-0.395206	0.113487	-0.230495	0.0933239	PHM5	vacuolar polyphosphatase
YDR453C	-1.01039	0.0207238	0.316183	0.178792		strong similarity to thiol-specific antioxidant proteins
YDR454C	0.0853904	0.819951	0.117912	0.500345	GUK1	guanylate kinase
YDR455C	0.0780129	0.70841	0.89229	0.0813058		questionable ORF
YDR456W	-0.0811503	0.810741	0.546027	0.13909	NHX1	Na+ /H+ exchanger
YDR458C	-0.395838	0.052852	-0.773548	0.0436444		similarity to hypothetical protein YML034w and YML033w
YDR459C	0.272717	0.168396	0.183704	0.267192		weak similarity to YNL326c
YDR460W	0.137116	0.497067	-0.281656	0.259833	TFB3	TFIIH subunit Tfb3 , contains ring finger motif ; similar to mammalian CAK subunit
YDR461W	0.107989	0.835483	0.641487	0.206248	MFA1	a-factor mating pheromone precursor
YDR462W	0.690329	0.167666	0.190714	0.217105	MRPL28	Mitochondrial ribosomal protein MRPL28 (YmL28)
YDR463W	-0.229321	0.376865	0.00389436	0.977072	STP1	Nuclear-localized protein containing zinc finger motifs
YDR464W	-0.485847	0.0990674	-0.471035	0.123596	SPP41	negative regulator of prp genes
YDR465C	1.26974	0.0125771	-0.28027	0.288399	RMT2	Protein arginine methyltransferase
YDR466W	-0.118726	0.330161	-0.0419711	0.425605		similarity to ser/thr protein kinase
YDR467C	0.437282	0.00434155	0.126771	0.0126896		questionable ORF
YDR468C	0.258529	0.27628	-0.480373	0.19536	TLG1	tSNARE that affects a Late Golgi compartment
YDR469W	0.556476	0.32892	-0.567207	0.12724		hypothetical protein
YDR470C	0.105996	0.452435	0.0860027	0.261479		similarity to chromosome segregation protein Cse1p
YDR471W	1.40735	0.127933	0.0802867	0.720571	RPL27B	Ribosomal protein L27B
YDR472W	0.468253	0.0351736	0.351021	0.0599839	TRS31	Component of targeting complex (TRAPP) involved in ER to Golgi membrane traffic
YDR473C	-0.145015	0.101737	-0.796735	0.0359051	PRP3	snRNP from U4 /U6 and U5 snRNPs
YDR474C	-1.14071	0.0259479	0.0971896	0.574842		similarity to C-terminal region of YOR019w
YDR475C	-0.640511	0.171075	-0.179283	0.193405		hypothetical protein
YDR476C	0.424252	0.299905	0.72265	0.0617114		hypothetical protein
YDR477W	-0.880308	0.0237707	-0.00945825	0.927983	SNF1	protein serine /threonine kinase
YDR478W	0.443378	0.204195	-0.205441	0.0428498	SNM1	RNase MRP (Mitochondrial RNA Processing) protein component
YDR479C	-0.381713	0.212068	0.0403865	0.638		weak similarity to YHR150w
YDR480W	0.671051	0.0135782	0.00856948	0.956587	DIG2	MAP kinase-associated protein
YDR481C	-1.99038	0.000686781	-0.00985028	0.836075	PHO8	repressible alkaline phosphatase
YDR482C	0.70296	0.1546	0.10823	0.206729		hypothetical protein
YDR483W	-0.224654	0.543121	0.354642	0.105293	KRE2	alpha-1,2-mannosyltransferase
YDR484W	-0.0105458	0.91394	-0.476498	0.125854	SAC2	involved in localization of actin and chitin
YDR485C	0.157331	0.276606	-0.5597	0.0563827		similarity to trichohyalin
YDR486C	-0.0892413	0.417413	-0.0411977	0.731263		weak similarity to Snf7p
YDR487C	1.24119	0.208587	0.410317	0.0601874	RIB3	3,4-dihydroxy-2-butanone 4-phosphate synthase
YDR488C	-0.153362	0.460131	-0.0169808	0.937759	PAC11	similar to rat dynein intermediate chain
YDR489W	0.921892	0.0529157	0.315648	0.0402477		hypothetical protein
YDR490C	0.0706367	0.901759	0.474193	0.160967	PKH1	Ser /Thr protein kinase
YDR491C	-0.209051	0.447729	0.187816	0.470279		questionable ORF
YDR492W	0.491705	0.396577	0.411732	0.243057		strong similarity to hypothetical protein YOL002c
YDR493W	0.862295	0.00362801	0.111637	0.0735952		hypothetical protein
YDR494W	0.463847	0.168194	-0.51751	0.0772176		hypothetical protein
YDR495C	0.0259787	0.86507	-0.66222	0.0419251	VPS3	vacuolar protein targeting protein
YDR496C	1.5006	0.0827759	-0.668804	0.116203		similarity to hypothetical human and C.elegans proteins
YDR497C	1.50324	0.32609	0.367207	0.195457	ITR1	myo-inositol transporter
YDR498C	-0.370956	0.1008	0.180562	0.550298	SEC20	membrane glycoprotein, sorted by HDEL retrieval system
YDR499W	0.44427	0.0931093	-0.272012	0.139748	LCD1	cell cycle checkpoint protein
YDR500C	0.866461	0.0528532	0.0976658	0.419302	RPL37B	60S ribosomal protein L37B (L43) (YL35)
YDR501W	0.43823	0.433029	-0.0310687	0.60161	PLM2	PLasmid Maintenance
YDR502C	0.777868	0.472162	-0.128186	0.135541	SAM2	S-adenosylmethionine synthetase
YDR503C	-0.232997	0.404715	0.0195562	0.90403	LPP1	Lipid phosphate phosphatase
YDR504C	-0.53148	0.00429209	0.383037	0.299935		similarity to hypothetical T.brucei protein
YDR505C	-0.609102	0.0735753	0.043435	0.246014	PSP1	high-copy suppressor of cdc17 DNA polymerase alpha mutations
YDR506C	-0.855725	0.0239267	5.85044e-05	0.999529		similarity to FET3, YFL041w and F.floriforme diphenol oxidase
YDR507C	0.748568	0.0951976	-0.0404336	0.789753	GIN4	putative serine /threonine kinase
YDR508C	0.725865	0.0380399	0.216256	0.0316415	GNP1	high-affinity glutamine permease
YDR510W	0.709317	0.0419009	0.165134	0.456383	SMT3	ubiquitin-like protein
YDR511W	0.0885436	0.528529	0.459097	0.119983		weak similarity to C. elegans protein F25H9.7 and to the human complement 3 precursor
YDR512C	-0.10017	0.363969	0.451675	0.0263729		questionable ORF
YDR513W	-1.07913	0.00255906	0.36285	0.169457	TTR1	Glutaredoxin (thioltransferase) (glutathione reductase)
YDR514C	1.01484	0.0018305	-0.330172	0.120865		strong similarity to hypothetical protein YCL036w
YDR515W	0.608784	0.0983219	-0.670411	0.107215	SLF1	RNA binding protein with La motif
YDR516C	-0.706466	0.17572	0.169365	0.572838		strong similarity to glucokinase
YDR517W	-0.852171	0.00523304	0.0971259	0.785519	GRH1	Yeast homologue of mammalian GRASP proteins, also localised to the Golgi apparatus.
YDR518W	-0.0419263	0.899157	0.324689	0.0552996	EUG1	Protein disulfide isomerase homolog
YDR519W	0.387803	0.471442	0.25504	0.132218	FKB2	FKBP (FK506 binding protein) 13 ; peptidylprolyl cis-trans isomerase activity
YDR520C	0.273002	0.361623	-0.10649	0.23374		weak similarity to transcription factors of the zinc finger class
YDR521W	0.0524288	0.859987	-0.015364	0.776404		questionable ORF
YDR522C	-0.352649	0.41221	0.213158	0.207712	SPS2	involved in meiosis
YDR523C	-0.405795	0.135974	-0.266421	0.04978	SPS1	serine /threonine kinase homologous to Ste20p ; expressed in middle /late meiosis
YDR524C	0.421821	0.00451761	-0.00517074	0.921935	AGE1	ARF GAP with effector function(s)
YDR525W-A	-0.05322	0.776944	1.36679	0.0814563		identified by SAGE
YDR526C	0.564034	0.0487894	-0.202204	0.483774		questionable ORF
YDR527W	0.819775	0.0402651	-0.510716	0.127999		weak similarity to Plasmodium yoelii rhoptry protein
YDR528W	0.145064	0.656584	-0.065892	0.51062	HLR1	Homologous to LRE1 ; antagonistic to PKA
YDR529C	-1.21817	0.000415906	0.114456	0.1608	QCR7	ubiquinol-cytochrome c oxidoreductase subunit 7 (14 kDa)
YDR530C	-0.866332	0.00382918	0.127039	0.278624	APA2	5',5'''-P-1,P-4-tetraphosphate phosphorylase II
YDR531W	0.298275	0.123707	-0.369176	0.0263026		similarity to hypothetical A. thaliana and C. elegans proteins
YDR532C	-0.215022	0.128317	-0.93148	0.0234683		weak similarity Plasmodium repeat organellar protein
YDR533C	-1.40739	0.0279699	0.0418423	0.81212		strong similarity to hypothetical proteins YPL280w, YOR391c and YMR322c
YDR534C	-0.513413	0.380128	0.536777	0.300353		similarity to YOR383c,Sta1p and pig mucin
YDR535C	-0.260009	0.559577	-0.00332584	0.991811		hypothetical protein
YDR536W	-0.236942	0.640193	0.105061	0.354271	STL1	sugar transporter-like protein
YDR537C	-0.208214	0.216223	0.215197	0.379516		questionable ORF
YDR538W	-0.154422	0.33952	0.0880281	0.313488	PAD1	Phenylacrylic acid decarboxylase
YDR539W	-0.305212	0.198449	0.0344525	0.762024		similarity to E.coli hypothetical 55.3 kDa protein in rfah-rfe intergenic region
YDR540C	0.123254	0.791617	-0.309043	0.0819728		hypothetical protein
YDR541C	0.332612	0.335249	0.117741	0.149217		similarity to dihydroflavonol-4-reductases
YDR542W	0.160225	0.449911	0.537975	0.216088		strong similarity to subtelomeric encoded proteins
YDR543C	0.200701	0.578094	0.442828	0.221753		strong similarity to subtelomeric encoded proteins
YDR544C	-0.102294	0.866371	0.499675	0.0823196		strong similarity to subtelomeric encoded proteins
YDR545W	-1.03544	0.020183	0.600981	0.110442	YRF1-1	Y'-helicase protein 1
YEL001C	1.10257	0.166641	0.486665	0.0537763		hypothetical protein
YEL002C	0.0913969	0.816981	0.367101	0.142196	WBP1	oligosaccharyl transferase glycoprotein complex, beta subunit
YEL003W	0.0339957	0.915575	-0.934402	0.00542372	GIM4	bovine prefoldin subunit 2 homolog (putative)
YEL004W	0.456557	0.254483	0.0677773	0.181333	YEA4	similar to Gog5, which is involved in vanadate resistance
YEL005C	-0.506213	0.0471277	-0.0978603	0.257734	VAB2	Vac8p binding protein of 31 kDa
YEL006W	-0.481934	0.238856	-0.336526	0.0609515		similarity to peroxisomal membrane and mitochondrial carrier proteins
YEL008W	-0.00517178	0.974878	0.660434	9.24879e-05		hypothetical protein
YEL009C	1.2905	0.148353	0.156077	0.096255	GCN4	transcriptional activator of amino acid biosynthetic genes
YEL010W	0.291552	0.696654	0.00476955	0.966678		hypothetical protein
YEL011W	-2.49926	0.00221088	0.298689	0.35181	GLC3	1,4-glucan-6-(1,4-glucano)-transferase
YEL012W	-1.57989	0.00605971	-0.578478	0.00696074	UBC8	ubiquitin-conjugating enzyme ; ubiquitin-protein ligase
YEL013W	-0.29725	0.0370253	-0.280119	0.0520805	VAC8	An armadillo repeat-containing protein localized on the vacuolar membrane
YEL014C	0.337279	0.395899	0.0869266	0.397122		hypothetical protein
YEL015W	0.696611	0.032508	-0.582405	0.0733182		weak similarity to Spa2p
YEL016C	-0.471772	0.0148439	0.16114	0.468612		similarity to human nucleotide pyrophosphatase
YEL017C-A	0.731821	0.1928	1.01235	0.10159	PMP2	Proteolipid associated with plasma membrane H(+)-ATPase (Pma1p)
YEL017W	-0.46486	0.162161	0.259193	0.0111305		hypothetical protein
YEL018W	0.828088	0.0655377	-0.351205	0.113768		weak similarity to Rad50p
YEL019C	0.338297	0.299284	0.176957	0.443655	MMS21	involved in DNA repair
YEL020C	-0.868278	0.0155213	-0.13549	0.168529		similarity to O.formigenes oxalyl-CoA decarboxylase
YEL020W-A	0.553602	0.0248294	-0.10434	0.24141	TIM9	mitochondrial inner membrane translocase
YEL022W	0.231438	0.478549	0.0226399	0.446993	GEA2	ARF GTP /GDP exchange factor
YEL023C	-0.296147	0.142933	-0.12799	0.224233		hypothetical protein
YEL024W	-1.33691	0.00442329	0.185844	0.316573	RIP1	Rieske iron-sulfur protein of the mitochondrial cytochrome bc1 complex
YEL025C	-0.00995806	0.957375	-0.24157	0.0038768	SRI1	SWI /SNF and RSC interacting protein 1
YEL026W	2.57061	0.0608986	0.762545	0.0209004	SNU13	U4 /U6.U5 snRNP component
YEL027W	0.788605	0.0440546	0.914573	0.0804783	CUP5	vacuolar ATPase V0 domain subunit c (17 kDa)
YEL028W	0.530701	0.239804	0.293969	0.0506582		hypothetical protein
YEL029C	0.795254	0.403765	-0.633752	0.00223025		similarity to hypothetical protein YNR027w
YEL030W	-0.755816	0.140568	0.194495	0.32346	ECM10	similar to Hsp70, involved in cell wall biogenesis
YEL031W	-0.188039	0.359112	0.359063	0.181983	SPF1	P-type ATPase
YEL033W	0.708142	0.0919129	0.849939	0.0248127		weak similarity to Sauroleishmania mitochondrial hypothetical ORF-5 protein
YEL034W	0.50427	0.117599	0.724259	0.0164186	HYP2	Translation initiation factor eIF-5A
YEL035C	0.342691	0.507621	0.450163	0.132887	UTR5	protein of unknown function
YEL036C	0.594894	0.0226027	0.317008	0.0590239	ANP1	subunit of mannosyltransferase complex
YEL037C	0.453501	0.0849803	0.0863489	0.604822	RAD23	ubiquitin-like protein
YEL038W	-0.147168	0.535009	0.566644	0.0263501	UTR4	similarity to K.oxytoca enolase-phosphatase E-1
YEL039C	-1.04002	0.0187494	0.227185	0.04388	CYC7	iso-2-cytochrome c
YEL040W	3.12813	0.201029	0.501867	0.0266034	UTR2	weak similarity to Bacillus 1,3-1,4-beta-glucanase
YEL041W	-0.903919	0.0266213	-0.260817	0.00849022		strong similarity to Utr1p
YEL042W	0.527286	0.240957	0.348172	0.00183652	GDA1	Guanosine diphosphatase of Golgi membrane
YEL043W	0.0151648	0.962976	0.33514	0.0363986		weak similarity to Mad1p
YEL044W	0.0974592	0.352332	0.0517388	0.62578		hypothetical protein
YEL045C	1.14388	0.192089	1.34409	0.0208465		weak similarity to cytochrome c oxidase III of T.brucei kinetoplast
YEL046C	-0.0779223	0.78379	0.377726	0.0745704	GLY1	Threonine Aldolase
YEL047C	0.000202793	0.999428	0.353079	0.206645	FRDS1	soluble fumarate reductase, cytoplasmic
YEL048C	0.374184	0.256834	-0.355024	0.208631		hypothetical protein
YEL049W	-0.23049	0.674442	0.796362	0.050661	PAU2	similar to members of the seripauperin (PAU) family
YEL050C	0.354407	0.307282	-0.144304	0.133697	RML2	mitochondrial ribosomal protein L2 of the large subunit
YEL051W	-0.257699	0.568354	-0.617728	0.0403266	VMA8	vacuolar ATPase V1 domain subunit D
YEL052W	0.14519	0.703914	0.158886	0.43034	AFG1	ATPase family gene
YEL053C	-0.0673508	0.592794	-0.269748	0.0227164	MAK10	glucose-repressible protein required for replication of dsRNA virus
YEL055C	0.327329	0.000951809	-0.0949093	0.213722	POL5	DNA polymerase V
YEL056W	0.395286	0.0788019	0.0902023	0.325816	HAT2	subunit of a cytoplasmic histone acetyltransferase
YEL057C	0.541567	0.0433463	0.391634	0.206094		hypothetical protein
YEL059C-A	-0.578135	0.0980642	0.598959	0.125611	SOM1	involved in mitochondrial inner peptidase function
YEL059W	-0.144897	0.537558	0.358596	0.124503		hypothetical protein
YEL061C	0.253292	0.454419	-0.412073	0.273915	CIN8	kinesin-related protein involved in establishment and maintenance of mitotic spindle
YEL062W	0.176456	0.54311	0.316847	0.126706	NPR2	Non-membrane-embedded, PEST sequence-containing protein
YEL063C	-0.579011	0.0510109	0.42243	0.0330767	CAN1	arginine permease
YEL064C	-0.789648	0.10483	-0.0379295	0.81001		similar to amino acid transport proteins
YEL065W	0.623247	0.429025	0.0834475	0.483804	SIT1	Ferrioxamine B permease
YEL066W	-0.453196	0.421584	0.570157	0.217922	HPA3	histone acetyltransferase complex subunit
YEL067C	0.259296	0.44256	0.565018	0.127292		weak similarity to YKL083w
YEL068C	-0.798322	0.0369757	0.281285	0.259643		hypothetical protein
YEL069C	-0.536383	0.0931791	0.469831	0.0493585	HXT13	high-affinity hexose transporter
YEL070W	-1.06895	0.0106004	0.046233	0.84822		strong similarity to E.coli D-mannonate oxidoreductase
YEL071W	1.03616	0.198251	-0.029133	0.577182	DLD3	D-lactate dehydrogenase
YEL072W	-0.708436	0.0266717	-0.720483	0.0286706		hypothetical protein
YEL073C	0.950691	0.38746	-0.094232	0.627892		similarity to YJR108w
YEL074W	0.0424992	0.845813	0.418696	0.278014		similarity to subtelomeric encoded proteins
YEL075C	-0.116945	0.593916	0.546383	0.0947106		strong similarity to subtelomeric encoded proteins
YEL076C	-0.689301	0.0284908	0.556597	0.0376426		hypothetical protein
YEL076W-C	-0.61516	0.0130224	0.600998	0.114525		hypothetical protein
YEL077C	-1.12049	0.00314173	0.435254	0.241443		strong similarity to subtelomeric encoded proteins
YER001W	-0.921582	0.0708276	-0.248973	0.147617	MNN1	Alpha-1,3-mannosyltransferase
YER002W	0.781695	0.0363248	-0.772854	0.150805		weak similarity to chicken microfibril-associated protein
YER003C	0.497065	0.411542	0.358235	0.0644572	PMI40	mannose-6-phosphate isomerase
YER004W	0.185296	0.518408	0.412215	0.0581396		similarity to hypothetical E.coli and C.elegans proteins
YER005W	-0.198962	0.29154	0.0597004	0.532617	YND1	apyrase (NDPase /NTPase)
YER006W	1.18716	0.0496625	-0.332888	0.138793		similarity to P.polycephalum myosin-related protein mlpA
YER007W	-0.316853	0.390938	-0.253898	0.256644	PAC2	(putative) tubulin cofactor E, involved in microtubule stability
YER008C	0.0131847	0.935505	0.12068	0.267924	SEC3	SEC3 encodes the 144 kD and 91 kD components of the Exocyst complex ; the 91 kD component is a C-terminal proteolytic breakdown product of full length Sec3p
YER009W	1.1255	0.0902594	0.651614	0.02521	NTF2	nuclear transport factor, homologous to mammalian cytosolic nuclear import factor NTF2
YER010C	-0.115494	0.610928	0.569517	0.0812467		similarity to L.pneumophila dlpA
YER011W	3.17364	0.194034	0.89209	0.0753595	TIR1	Cold-shock induced protein of the Srp1p /Tip1p family of serine-alanine-rich proteins
YER012W	0.214875	0.652734	-0.10579	0.245342	PRE1	22.6 kDa proteasome subunit
YER013W	-0.313118	0.0979419	-0.122236	0.335683	PRP22	helicase-like protein
YER014W	-0.142482	0.548221	-0.216529	0.0805623	HEM14	protoporphyrinogen oxidase
YER015W	-1.08653	0.0282641	-0.119665	0.25415	FAA2	Acyl-CoA synthetase (fatty acid activator 2)
YER016W	0.423928	0.230089	-0.327699	0.371003	BIM1	microtubule-binding protein
YER017C	0.321179	0.47383	0.0167628	0.819726	AFG3	ATP-dependent metalloprotease
YER018C	0.60841	0.0379571	0.590408	0.0321224	SPC25	component of spindle pole
YER019C-A	0.591794	0.0572664	0.553482	0.00193566	SBH2	homologous to Sbh1p
YER019W	0.530964	0.0415653	0.831368	0.106	ISC1	InositolphosphoSphingolipids-phospholipase C
YER020W	-1.00247	0.0229294	0.164759	0.206089	GPA2	nucleotide binding regulatory protein
YER021W	-0.264912	0.172621	-0.257928	0.153431	RPN3	component of the regulatory module of the 26S proteasome, homologous to human p58 subunit
YER022W	-0.349136	0.0581882	-0.679957	0.0604714	SRB4	subunit of RNA polymerase II holoenzyme /mediator complex
YER023W	-0.386382	0.239188	-0.035555	0.72836	PRO3	delta 1-pyrroline-5-carboxylate reductase
YER024W	-0.0914119	0.842768	-0.0894732	0.313509		similarity to carnitine O-acetyltransferase Yat1p
YER025W	0.785723	0.0170225	-0.00471199	0.94466	GCD11	gamma subunit of translational initiation factor eIF-2
YER027C	-0.599079	0.0173628	0.0723411	0.460405	GAL83	glucose repression protein, a component of the Snf1 complex
YER028C	0.395557	0.123018	0.169746	0.0510053		similarity to Mig1p
YER029C	0.0604358	0.717542	-0.446393	0.0931406	SMB1	U1 snRNP protein
YER030W	-0.034773	0.870943	-0.802488	0.0412471		similarity to mouse nucleolin
YER031C	0.350187	0.360827	0.0819629	0.470805	YPT31	ras-like GTPase, highly homologous to YPT32
YER032W	-0.232875	0.398033	0.491567	0.180991	FIR1	Putative participant in 3' mRNA processing
YER033C	-0.370512	0.218534	0.328759	0.219842	ZRG8	zinc regulated gene
YER034W	-0.242147	0.203284	-0.019522	0.818216		hypothetical protein
YER035W	-0.79962	0.0031819	0.0541359	0.400063	EDC2	Functions with Edc1p to stimulate mRNA decapping
YER036C	0.695998	0.156777	-0.0708893	0.187794		strong similarity to members of
YER037W	-1.37389	0.0272634	-0.400455	0.136856	PHM8	strong similarity to hypothetical
YER038C	-0.163628	0.561126	-0.0151534	0.872022		hypothetical protein
YER039C	-0.536751	0.112984	0.406981	0.185544	HVG1	(putative) nucleotide sugar transporter
YER040W	0.0276771	0.90094	0.235086	0.252963	GLN3	Transcriptional activator of nitrogen-regulated genes
YER041W	-0.402519	0.173582	-0.219977	0.310661	YEN1	weak similarity to DNA repair protein Rad2p and Dsh1p
YER042W	-0.109017	0.441673	-0.210774	0.173982	MXR1	peptide methionine sulfoxide reductase
YER043C	1.24132	0.289347	0.378326	0.0545678	SAH1	putative S-adenosyl-L-homocysteine hydrolase
YER044C	-0.728559	0.0291428	0.440999	0.0518768		involved in synthesis of ergosterol
YER044C-A	1.11766	0.241503	-0.271326	0.018569	MEI4	mRNA is meiosis-specific and has 88 bp intron at 5' end spliced independently of MER1.
YER046W	-0.672459	0.0601021	0.399553	0.0985331		hypothetical protein
YER048C	-0.341196	0.0796734	-0.46043	0.129245	CAJ1	homologous to E. coli DnaJ
YER048W-A	0.632183	0.0296324	0.0676191	0.115622		dnaJ homolog
YER049W	1.19975	0.168538	-0.308516	0.0530366		strong similarity to hypothetical
YER050C	0.409901	0.0239229	-0.595608	0.0320484	RSM18	protein of the small subunit of the mitochondrial ribosome
YER051W	-0.687419	0.0150193	-0.348758	0.0611322		similarity to C.elegans hypothetical
YER052C	0.0539374	0.811418	0.102331	0.323964	HOM3	Aspartate kinase (L-aspartate 4-P-transferase) (EC 2.7.2.4)
YER053C	-1.30992	0.00814306	-0.285673	0.0225066		strong similarity to mitochondrial
YER054C	-1.46438	0.00779716	0.262312	0.310549	GIP2	(putative) regulator of Glc7, a PP1 family protein phosphatase
YER055C	0.91864	0.125113	0.00803586	0.939606	HIS1	ATP phosphoribosyltransferase
YER056C	0.94874	0.197639	0.169018	0.313612	FCY2	purine-cytosine permease
YER056C-A	1.17185	0.0267499	0.409069	0.0726038	RPL34A	Ribosomal protein L34A
YER057C	-0.291415	0.158922	0.584956	0.108192	HIG1	heat-regulated protein
YER058W	0.368582	0.114589	-0.447432	0.180304	PET117	cytochrome c oxidase assembly factor
YER059W	-0.486373	0.0239067	-0.286447	0.0185104	PCL6	PHO85 cyclin
YER060W	0.0651079	0.820363	0.812806	0.0597646	FCY21	purine-cytosine permease
YER061C	0.0066876	0.984077	-0.148363	0.235472	CEM1	Protein homologous to beta-keto-acyl synthase
YER063W	-0.78808	0.00272651	-0.180321	0.241575	THO1	(putative) involved in transcription
YER064C	0.573209	0.171199	-0.191288	0.0112794		similarity to hypothetical protein YIL056w
YER065C	-0.996005	0.0652857	0.406478	0.0941731	ICL1	isocitrate lyase
YER066C-A	-2.19891	0.000334639	0.0355182	0.756006		hypothetical protein
YER066W	-0.802721	0.00192426	0.0971805	0.420566		strong similarity to cell division control protein Cdc4p
YER067W	-2.20033	0.00372345	0.625439	0.04423		strong similarity to hypothetical protein YIL057c
YER068W	0.366428	0.138441	0.226061	0.0643029	MOT2	putative zinc finger protein
YER069W	0.153417	0.768673	-0.331663	0.21784	ARG5,6	N-acetyl-gamma-glutamyl-phosphate reductase and acetylglutamate kinase
YER070W	0.778789	0.275683	0.375799	0.0393325	RNR1	ribonucleotide reductase
YER071C	0.155973	0.056352	-0.0817986	0.0257011		hypothetical protein
YER072W	-0.47442	0.293938	0.820057	0.0237058	VTC1	Homolog of S. pombe nrf1 (78 % identical in predicted amino acid sequence)
YER073W	-0.419164	0.0148946	-0.0287209	0.809799	ALD5	mitochondrial Aldehyde Dehydrogenase
YER074W	1.11865	0.072798	-0.024958	0.840625	RPS24A	40S ribosomal protein S24A
YER075C	-0.144247	0.755818	0.10785	0.364134	PTP3	Protein tyrosine phosphatase
YER076C	-0.671053	0.0796551	0.0420418	0.223117		similarity to killer toxin Khr1p
YER077C	0.6566	0.0416816	-0.541681	0.0578573		hypothetical protein
YER078C	-0.326153	0.0684513	-0.177812	0.136127		similarity to E.coli X-Pro aminopeptidase II
YER079W	-1.07932	0.00127563	-0.128182	0.21318		hypothetical protein
YER080W	-0.481945	0.00687403	-0.151992	0.197897		hypothetical protein
YER081W	0.496728	0.253008	0.117704	0.430112	SER3	3-phosphoglycerate dehydrogenase
YER082C	1.26974	0.00520824	-0.298056	0.333707		similarity to M.sexta steroid regulated MNG10 protein
YER084W	-0.448028	0.36842	0.185032	0.804317		questionable ORF
YER085C	0.307231	0.659171	0.283562	0.528423		weak similarity to myosins
YER086W	0.625127	0.0731601	-0.0571803	0.309716	ILV1	threonine deaminase
YER087C-A	0.647898	0.042391	0.736545	0.0708234	SBH1	homologous to Sbh2p
YER087W	0.213959	0.319413	-0.238681	0.16059		similarity to E.coli prolyl-tRNA synthetase
YER088C	-0.468407	0.0724111	0.608894	0.160393	DOT6	nuclear protein with Myb domain involved in telomeric silencing
YER089C	-0.309484	0.0434299	0.440367	0.0785931	PTC2	Protein phosphatase type 2C
YER090W	0.538826	0.307197	-0.146107	0.0489247	TRP2	anthranilate synthase Component I
YER091C	-0.470324	0.378879	0.40741	0.0350734	MET6	vitamin B12-(cobalamin)-independent isozyme of methionine synthase (also called N5-methyltetrahydrofolate homocysteine methyltransferase or 5-methyltetrahydropteroyl triglutamate homocysteine methyltransferase)
YER091C-A	0.0881792	0.845359	0.00450123	0.978359		hypothetical protein - identified by SAGE
YER092W	0.532302	0.0257909	-0.0856778	0.0534774		similarity to E.coli prolyl-tRNA synthetase
YER093C	0.702766	0.023485	0.263432	0.0339389		weak similarity to S.epidermidis PepB protein
YER093C-A	-0.205213	0.351753	0.311985	0.198451		similarity to hypothetical protein YBL059w
YER094C	0.452961	0.260381	0.220762	0.275158	PUP3	20S proteasome subunit beta3_sc
YER095W	0.693565	0.2018	0.17628	0.583079	RAD51	RecA homolog ; Rad51p colocalizes to ~ 65 spots with Dmc1p prior to synapsis (independently of ZIP1 and DMC1), and interacts with Rad52p and Rad55p ; human Rad51p homolog interacts with Brca2 protein which has been implicated in causing breast cancer
YER096W	-2.06257	0.00128458	-0.369499	0.0852845	SHC1	sporulation-specific homolog of csd4
YER097W	-0.121764	0.71501	0.241795	0.23991		weak similarity to ribosomal S3 proteins
YER098W	-0.460152	0.0907319	0.189894	0.412085	UBP9	ubiquitin carboxyl-terminal hydrolase
YER099C	-0.215385	0.301973	0.136721	0.314596	PRS2	ribose-phosphate pyrophosphokinase 2
YER100W	0.043411	0.714741	-0.133831	0.167947	UBC6	ubiquitin-conjugating enzyme
YER101C	-0.906565	0.0290599	-0.0522752	0.521589	AST2	involved in targeting of plasma membrane [H+]ATPase
YER102W	2.07663	0.067946	0.196568	0.24533	RPS8B	Ribosomal protein S8B (S14B) (rp19) (YS9)
YER103W	-2.46392	0.00109978	0.0588665	0.734569	SSA4	member of 70 kDa heat shock protein family
YER104W	-0.343997	0.288723	-0.057676	0.379957	RTT105	same phenotype as RTT101, 102, 103, 104
YER105C	-0.137635	0.026926	0.0811071	0.0101445	NUP157	Nucleoporin similar to Nup157p and to mammalian Nup155p
YER106W	0.401711	0.465768	-0.5697	0.304515		hypothetical protein
YER107C	0.454832	0.117503	0.161724	0.356303	GLE2	homologous to S. pombe RAE1 gene ; 2-hybrid analysis demonstrates an interaction with Srp1p and Rip1p ; copurifies with Nup116p
YER109C	0.0406934	0.846926	-0.108504	0.258834	FLO8	putative transcriptional activator of FLO1
YER110C	0.552445	0.228599	0.192089	0.0905996	KAP123	Karyopherin beta 4
YER111C	0.0892053	0.175219	-0.188856	0.367797	SWI4	transcription factor
YER112W	0.590781	0.275417	-0.595226	0.0684512	LSM4	U6 snRNA associated protein
YER113C	-0.117252	0.560952	-0.194417	0.291443		similarity to Emp70p
YER114C	-0.126729	0.780227	0.0620567	0.846694	BOI2	involved in bud formation, has SH3 domain
YER115C	-0.714727	0.119162	-0.216942	0.147208	SPR6	involved in sporulation
YER116C	0.296675	0.388124	-0.247859	0.0637843		zinc-finger protein
YER117W	2.31934	0.0926182	0.466867	0.126094	RPL23B	Ribosomal protein L23B (L17aB) (YL32)
YER118C	1.31903	0.103267	0.429769	0.0310992	SHO1	Transmembrane osmosensor
YER119C	-0.917546	0.0175091	1.08295	0.0623305		similar to amino acid transport proteins
YER120W	0.302814	0.237473	0.515731	0.10243	SCS2	involved in inositol metabolism, regulator of INO1 expression
YER121W	-0.946414	0.0161124	0.117805	0.360932		hypothetical protein
YER122C	0.391807	0.0632322	-0.25624	0.371786	GLO3	Zinc-finger-containing protein with similarity to Gcs1p and Sps18p
YER123W	0.128143	0.365362	-0.263615	0.0793224	YCK3	plasma membrane-bound casein kinase I homolog
YER124C	-0.311433	0.650969	-0.0161769	0.880715		weak similarity to Dictyostelium WD40 repeat protein 2
YER125W	-0.594291	0.0406159	0.314158	0.218895	RSP5	Rsp5p encodes a hect (homologous to E6-AP C terminus) and encodes a ubiquitin-protein ligase (E3 enzyme)
YER126C	1.51532	0.147777	-0.403099	0.150965		Lethal with conditional pap1 allele
YER127W	1.52754	0.109307	-0.511625	0.0976994	LCP5	involved in ribosomal RNA processing
YER128W	0.0802663	0.599581	-0.133843	0.603533		high copy suppressor of temperature sensitive cdc17 (DNA polymerase alpha) mutations
YER129W	-0.257086	0.400328	0.000714572	0.98556	PAK1	DNA polymerase alpha suppressing protein kinase
YER130C	0.121572	0.764605	-0.295425	0.0602844		similarity to Msn2p and weak similarity to Msn4p
YER131W	0.771749	0.0713198	0.089119	0.601657	RPS26B	Ribosomal protein S26B
YER133W	-0.401109	0.0158565	-0.774539	0.0300421	GLC7	protein phosphatase type I
YER134C	-0.129703	0.37226	-0.118235	0.195967		weak similarity to S.pombe SPBC13G1 and C.elegans F26F2.d hypothetical proteins
YER135C	-0.403884	0.495957	-0.287431	0.661534		hypothetical protein
YER136W	-0.580717	0.0644266	-0.130473	0.118825	GDI1	GDP dissociation inhibitor
YER137C	0.0903228	0.791156	-0.496556	0.107254		weak similarity to Mycoplasma hominis P120 protein
YER137C-A	0.57017	0.0931488	0.268025	0.0501863		TyA gag protein. Gag processing produces capsid proteins.
YER138W-A	0.390037	0.244378	0.160909	0.0707526		questionable ORF - identified by SAGE
YER139C	-0.665012	0.000847934	-0.461819	0.0413387		similarity to hypothetical protein YDR066c
YER140W	0.117255	0.673655	-0.121713	0.110294		hypothetical protein
YER141W	-0.231447	0.503999	0.0740851	0.786176	COX15	cytochrome oxidase assembly factor
YER142C	-0.512456	0.0918251	-0.388615	0.0460817	MAG1	3-methyladenine DNA glycosylase
YER143W	-0.0674352	0.830929	0.103013	0.390401	DDI1	DNA Damage Inducible ; binds to T- and V- snare complexes
YER144C	-0.077886	0.812717	0.778418	0.0586988	UBP5	Putative Ubiquitin-specific protease
YER145C	0.438766	0.384281	0.099819	0.366093	FTR1	Iron permease
YER146W	0.526628	0.187352	0.105041	0.372377	LSM5	Sm-like protein
YER147C	-0.453844	0.420301	0.00677716	0.952846		weak similarity to mouse NAD(P)H dehydrogenase (quinone)
YER148W	0.76368	0.0317764	-0.372759	0.127119	SPT15	TATA-binding protein (tfIId)
YER149C	-0.311482	0.236539	-0.234934	0.165505	PEA2	Protein with coiled-coil domain
YER150W	-2.13279	5.70628e-06	0.775622	0.200223	SPI1	similar to Sed1 ; highly expressed in stationary phase
YER151C	-0.0244114	0.92002	-0.168634	0.236677	UBP3	Ubiquitin-specific protease
YER152C	-0.636037	0.0182269	0.491046	0.033956		weak similarity to E.coli hypothetical protein f470
YER154W	-0.21931	0.38283	0.385447	0.201828	OXA1	involved in cytochrome c oxidase and ATP synthase assembly
YER156C	0.552356	0.144521	-0.096499	0.263906		similarity to hypothetical C. elegans protein C27H6.5
YER157W	0.450886	0.209702	-0.252704	0.0157592	SEC34	Sec34p is a 92.5 kD protein that is primarily cytosolic but a small pool associates with the particulate fraction upon centrifugation at 150,000xg. Sec34p stably associates with Sec35p, a protein implicated in vesicle docking, to form a multiprotein comple
YER158C	-1.48995	0.00128019	-0.00511625	0.97133		weak similarity to Afr1p
YER159C	0.631863	0.244378	-0.139341	0.227909	BUR6	Transcriptional regulator which functions in modulating the activity of the general transcription machinery in vivo
YER160C	1.18135	0.0256452	0.417677	0.00961963		transposon Ty putative peptide with frame shift
YER161C	-0.153991	0.0503737	-0.390132	0.177155	SPT2	non-specific DNA binding protein (sin1)
YER162C	-0.441257	0.0999324	-0.519851	0.0409835	RAD4	Nucleotide excision repair protein
YER163C	0.232733	0.712787	0.143642	0.257125		weak similarity to E.coli cation transport protein
YER164W	-0.0596538	0.863042	0.115651	0.456729	CHD1	transcriptional regulator
YER165W	-0.0520602	0.89188	0.03131	0.758544	PAB1	Poly(A) binding protein, cytoplasmic and nuclear
YER166W	0.138082	0.723618	0.745183	0.15455		similarity to ATPase P.falciparum ATPase 2
YER168C	-0.156159	0.402105	-0.289414	0.0403931	CCA1	tRNA nucleotidyltransferase (tRNA CCA-pyrophosphorylase)
YER169W	-0.407492	0.158343	0.0415981	0.689937	RPH1	Repressor of PHR1 transcription ; binds to PHR1 URS
YER170W	0.084522	0.353244	-0.0926012	0.73022	ADK2	Adenylate kinase (mitochondrial GTP:AMP phosphotransferase)
YER171W	0.443959	0.167541	-0.374957	0.0638654	RAD3	DNA repair helicase component of transcription factor b
YER172C	-0.203995	0.406885	-0.0632666	0.42999	BRR2	putative ATP-dependent RNA helicase
YER173W	-0.0835054	0.350662	-0.269334	0.161919	RAD24	(putative) cell cycle exonuclease
YER174C	-0.248606	0.200561	-0.189282	0.0145706	GRX4	Protein with glutaredoxin activity
YER175C	-0.374139	0.483126	-0.455116	0.0265532		putative methyltransferase
YER176W	-0.573624	0.025084	-0.449696	0.0668736	ECM32	DNA Helicase I
YER177W	0.658908	0.119437	0.353167	0.0282751	BMH1	Homolog of mammalian 14-3-3 proteins
YER178W	0.170729	0.60753	0.250362	0.27611	PDA1	alpha subunit of pyruvate dehydrogenase (E1 alpha)
YER179W	-0.173106	0.239596	0.340966	0.0132944	DMC1	meiosis-specific protein related to RecA and Rad51p. Dmc1p colocalizes with Rad51p to discrete subnuclear sites in nuclear spreads during mid prophase, briefly colocalizes with Zip1p, and then disappears by pachytene
YER180C	-0.194496	0.327585	-0.111847	0.54865	ISC10	involved in meoisis, spore formation
YER181C	0.231335	0.505829	-0.176404	0.37739		questionable ORF
YER182W	-0.230026	0.392053	-0.286311	0.0376592		hypothetical protein
YER183C	0.551395	0.0092489	-0.0216089	0.826341	FAU1	5,10-methenyltetrahydrofolate synthetase
YER184C	-0.0175142	0.960951	-0.293934	0.00272881		similarity to multidrug resistance proteins Pdr3p and Pdr1p
YER185W	0.557879	0.288705	-0.0810211	0.693835		strong similarity to Rtm1p
YER186C	-1.64481	0.00242701	-0.378509	0.0368386		weak similarity to hypothetical protein YMR316w
YER187W	0.0841263	0.904811	0.213037	0.42265		similar to killer toxin
YER187W-A	0.316263	0.633359	0.0885007	0.42265	KHS1	Killer toxin
YER188W	0.763183	0.558819	-0.103085	0.788983		hypothetical protein
YER189W	-0.760409	0.0100791	0.406366	0.0294293		strong similarity to subtelomeric encoded proteins
YER190W	-1.08121	0.00248921	0.643798	0.111372	YRF1-2	Y'-helicase protein 1
YFL001W	0.454147	0.0132052	-0.0173836	0.937229	DEG1	Depressed growth-rate protein
YFL002C	0.0240041	0.911678	-0.584829	0.11747	SPB4	ATP-dependent RNA helicase
YFL002W-B	-0.163634	0.53794	-0.0292931	0.641474		The TyB Gag-Pol protein. Gag processing produces capsid proteins. Pol is cleaved to produce protease, reverse transcriptase, and integrase activities.
YFL003C	0.137145	0.390621	0.0451602	0.659248	MSH4	meiosis specific protein, E.coli MutS protein, localizes to discrete sites on meiotic chromosomes
YFL004W	-1.05905	0.0315811	-0.369281	0.0315011	VTC2	polyphosphate synthetase (putative)
YFL005W	-0.156593	0.428446	-0.302547	0.0163945	SEC4	Ras-like small GTP-binding protein
YFL006W	-0.34035	0.260586	0.406859	0.126901		hypothetical protein
YFL008W	0.0896381	0.671967	-0.666338	0.00588965	SMC1	SMC chromosomal ATPase family member
YFL009W	-0.340793	0.00721099	-0.0996564	0.145429	CDC4	part of a ubiquitin ligase complex
YFL010C	0.447474	0.102119	0.30849	0.0276365		questionable ORF
YFL011W	-0.0817717	0.358313	0.201441	0.327633	HXT10	high-affinity hexose transporter
YFL012W	-0.375461	0.49087	0.263629	0.194902		hypothetical protein
YFL013C	-0.0581281	0.617621	-0.465894	0.0839966		weak similarity to Dictyostelium protein kinase
YFL014W	-2.91602	0.000496719	-0.446565	0.287592	HSP12	12 kDa heat shock protein
YFL015C	0.128327	0.618226	0.0806432	0.863734		weak similarity to YDR504c
YFL016C	0.115314	0.312041	-0.231277	0.129066	MDJ1	DnaJ homolog involved in mitochondrial biogenesis and protein folding
YFL017C	0.0674996	0.545168	0.280184	0.134141	GNA1	glucosamine-phosphate N-acetyltransferase
YFL017W-A	0.160406	0.206068	0.48344	0.0539771	SMX2	snRNP G protein (the homologue of the human Sm-G)
YFL018C	-1.08419	0.00310024	-0.179089	0.0233323	LPD1	dihydrolipoamide dehydrogenase precursor (mature protein is the E3 component of alpha-ketoacid dehydrogenase complexes)
YFL019C	0.105982	0.654844	0.63436	0.168602		hypothetical protein
YFL020C	0.230061	0.62065	0.584178	0.150993	PAU5	member of the seripauperin (PAU) family
YFL021W	-0.641255	0.14338	0.633266	0.0778459	GAT1	transcriptional activator with GATA-1-type Zn finger DNA-binding motif
YFL022C	0.207803	0.271091	0.442074	0.0470054	FRS2	Phenylalanyl-tRNA synthetase, beta subunit, cytoplasmic
YFL023W	-0.156229	0.559076	-0.824145	0.0158857		similarity to repeat structures in a Plasmodium falciparum protein (MESA) that binds human erythrocyte protein 4.1.
YFL024C	0.0740578	0.670971	-0.222735	0.0779646	EPL1	Probable chromatin protein because of homology to Drosophila Enahncer of Polycomb
YFL025C	0.421717	0.145116	0.246521	0.20212	BST1	negative regulator of COPII vesicle formation
YFL026W	1.25194	0.200367	0.484008	0.0486238	STE2	alpha-factor pheromone receptor ; seven-transmembrane domain protein
YFL027C	0.313699	0.325762	-0.426582	0.0823836		weak similarity to P.falciparum Pfmdr2 protein
YFL028C	0.113512	0.759563	-0.563458	0.0175749	CAF16	ABC ATPase
YFL029C	-0.206273	0.0816895	-0.244416	0.044641	CAK1	Cyclin-dependent kinase-activating kinase
YFL030W	-2.18507	0.000840074	-0.0296262	0.940774		similarity to several transaminases
YFL031W	-0.471321	0.130307	1.01329	0.179833	HAC1	bZIP (basic-leucine zipper) protein
YFL032W	0.204677	0.383121	1.54783	0.165149		questionable ORF
YFL034C-B	0.804957	0.132526	0.305051	0.142637	MOB2	Mob1p-like protein
YFL034W	-0.179396	0.242696	-0.0763723	0.696354		similarity to hypothetical S. pombe protein and to C.elegans F35D11 protein
YFL036W	0.20582	0.434363	0.0878173	0.385373	RPO41	mitohcondrial RNA polymerase
YFL037W	0.657742	0.333426	0.0155697	0.812811	TUB2	beta-tubulin
YFL038C	0.254488	0.473919	0.169731	0.347575	YPT1	Ras-like GTP-binding protein ; most similar to mammalian Rab1A protein
YFL039C	1.20285	0.228014	0	#DIV/0!	ACT1	Actin
YFL040W	-0.189092	0.512534	-0.0314696	0.88207		similarity to yeast glucose transport proteins
YFL041W	-0.0428474	0.845082	0.272184	0.10518	FET5	multicopper oxidase, type 1 integral membrane protein
YFL042C	-0.856647	0.0483732	-0.0415898	0.831225		similarity to hypothetical protein YLR072w
YFL044C	-0.473779	0.0591883	0.111813	0.127297		weak similarity to human dystrophin
YFL045C	0.974429	0.189471	0.0960154	0.197553	SEC53	phosphomannomutase
YFL046W	0.290262	0.23088	-0.493725	0.0612568		weak similarity to middle part of C.elegans myosin heavy chain A
YFL047W	0.863926	0.202631	-0.0196801	0.770406		similarity to S.pombe hypothetical protein SPAC2F7.18c
YFL048C	-0.0136478	0.951204	-0.131393	0.210659	EMP47	47 kDa type I transmembrane protein localized to the Golgi
YFL049W	0.363256	0.0968335	-0.326571	0.0980605		weak similarity to Npl6p
YFL050C	-0.250274	0.11902	0.0015012	0.987046	ALR2	(putative) ion transporter
YFL051C	-0.0371219	0.959245	0.344229	0.448772		putative pseudogene
YFL052W	-0.178633	0.260265	0.00720234	0.986586		strong similarity to Mal63p, YPR196w and Mal13p
YFL053W	-0.28568	0.26865	0.923068	0.032293	DAK2	dihydroxyacetone kinase
YFL054C	-0.45703	0.21442	0.00673654	0.968985		similarity to channel proteins
YFL055W	-0.0933733	0.795027	0.431156	0.131273	AGP3	Amino acid permease
YFL056C	-0.684022	0.0698036	0.106424	0.582498	AAD6	Hypothetical aryl-alcohol dehydrogenase (AAD)
YFL057C	-0.230419	0.254298	0.311513	0.154042		strong similarity to aryl-alcohol dehydrogenases
YFL058W	4.80212	0.383094	0.463856	0.387793	THI5	a thiamine regulated pyrimidine precursor biosynthesis enzyme
YFL059W	1.3043	0.00225196	0.425372	0.165186	SNZ3	member of the stationary phase-induced gene family
YFL061W	0.827559	0.0115305	0.11853	0.000126846		similarity to M.verrucaria cyanamide hydratase
YFL062W	0.283898	0.569197	-0.0340579	0.824064	COS4	similar to subtelomerically-encoded proteins
YFL063W	0.268122	0.398012	0.488672	0.474458		strong similarity to subtelomeric encoded proteins
YFL064C	-0.640571	0.0509602	0.50504	0.0879411		strong similarity to subtelomeric encoded proteins
YFL065C	-0.544274	0.0673506	0.706403	0.0428135		strong similarity to subtelomeric encoded proteins
YFL066C	-1.24113	0.0149284	0.69426	0.248719		strong similarity to subtelomeric encoded proteins
YFL067W	-1.36872	0.00643	0.71119	0.117606		similarity to mouse period clock protein
YFL068W	-1.0259	0.0215314	0.352936	0.289934		weak similarity to hypothetical E.coli protein
YFR001W	0.894251	0.0633458	-0.893992	0.112682	LOC1	Double-stranded RNA-binding protein
YFR002W	0.447456	0.168158	-0.330558	0.102819	NIC96	96 kDa nucleoporin-interacting component
YFR003C	-0.547384	0.056964	-0.192148	0.189235		hypothetical protein
YFR004W	0.21108	0.514842	-0.224932	0.194196	RPN11	Similar to S. pombe PAD1 gene product
YFR005C	0.824565	0.109392	-0.0381468	0.618342	SAD1	SnRNP assembly defective
YFR006W	0.49374	0.125615	0.0505187	0.717809		similarity to X-Pro dipeptidases
YFR007W	-0.389587	0.196647	-0.239196	0.0346155		weak similarity to YER176w
YFR008W	-0.478391	0.00266374	-0.570956	0.0180338		weak similarity to human centromere protein E
YFR009W	0.688033	0.044003	-0.204733	0.0682983	GCN20	Member of ATP-binding cassette (ABC) family of proteins
YFR010W	-0.146422	0.235871	-0.437902	0.118228	UBP6	(putative) ubiquitin-specific protease
YFR011C	0.00714163	0.969952	-0.16845	0.429076		ochre suppressor tyr-tRNA
YFR012W	-1.37878	0.0227786	-0.474857	0.34935		similarity to hypothetical protein YOL019w
YFR013W	-0.0139835	0.955329	-0.283469	0.194657	IOC3	ISWI One Complex
YFR014C	-1.3733	0.00867194	-0.0468369	0.642421	CMK1	Calmodulin-dependent protein kinase
YFR015C	-2.15659	6.5854e-05	0.351215	0.114615	GSY1	Glycogen synthase (UDP-gluocse--starch glucosyltransferase)
YFR016C	-0.375296	0.146002	-0.157584	0.466582		similarity to mammalian neurofilament proteins and to Dictyostelium protein kinase
YFR017C	-1.62429	0.0031168	0.642693	0.0978415		hypothetical protein
YFR018C	0.211336	0.205714	0.504761	0.203587		similarity to human glutaminyl-peptide cyclotransferase
YFR020W	0.0264045	0.945012	0.164173	0.271175		hypothetical protein
YFR021W	-0.445666	0.091063	0.285247	0.162135		similarity to hypothetical protein YPL100w
YFR022W	-0.363514	0.525078	0.439531	0.243444		similarity to Rod1p
YFR023W	-0.729426	0.00895288	-0.344711	0.569666	PES4	poly(A) binding protein ; related to PES4 protein homolog YHR015w
YFR024C	-0.027411	0.945731	0.168346	0.303914
YFR024C-A	-0.11209	0.700483	0.411554	0.190586		similarity to Acanthamoeba myosin heavy chain IC and weak similarity to other myosin class I heavy chains
YFR025C	0.23584	0.602268	-0.149363	0.0922971	HIS2	Histidinolphosphatase
YFR026C	-0.637094	0.188394	0.167374	0.527846		hypothetical protein
YFR027W	0.0766448	0.518566	0.146854	0.342197	ECO1	involved in establishment of cohesion between sister chromatids
YFR028C	0.857698	0.0931769	0.238681	0.0505854	CDC14	soluble tyrosine-specific protein phosphatase
YFR029W	-0.0355359	0.911762	0.515406	0.119214	PTR3	regulator of peptide permease
YFR030W	-0.791049	0.0820325	0.514282	0.0723906	MET10	subunit of assimilatory sulfite reductase
YFR031C	0.734882	0.0140772	-0.0323679	0.577256	SMC2	SMC chromosomal ATPase family member
YFR032C	0.292316	0.686814	0.342756	0.188075		weak similarity to S.pombe polyadenylate-binding protein, YPR112c and Sbp1p
YFR033C	-1.56234	0.00825456	-0.198827	0.00813565	QCR6	ubiquinol-cytochrome c oxidoreductase subunit 6 (17 kDa)
YFR034C	-0.00741145	0.982885	0.110183	0.202303	PHO4	myc-type helix-loop-helix transcription factor
YFR035C	0.738645	0.00679454	0.180886	0.286344		hypothetical protein
YFR036W	0.403694	0.0173907	0.380134	0.00321517	CDC26	cell division control protein
YFR037C	0.0773496	0.265496	-0.2532	0.0727788	RSC8	chromatin remodeling complex subunit
YFR038W	-0.187156	0.568272	-0.205416	0.0642031		strong similarity to mouse lymphocyte specific helicase
YFR039C	-0.0179669	0.959467	-0.139046	0.00985587		similarity to hypothetical protein YGL228w
YFR040W	-0.377584	0.105205	-0.378825	0.0192372	SAP155	cell cycle protein, interacts with Sit4
YFR041C	-0.332704	0.220503	-0.664018	0.069317		weak similarity to dnaJ-like heat shock proteins
YFR042W	0.248667	0.52498	0.449789	0.0445399		hypothetical protein
YFR043C	-0.237884	0.320917	0.0935861	0.260452		hypothetical protein
YFR044C	0.133709	0.163525	0.536425	0.173392		similarity to hypothetical protein YBR281c
YFR045W	-0.102671	0.306677	0.229796	0.354407		similarity to mitochondrial citrate transport proteins
YFR046C	-0.371208	0.038255	-0.332171	0.379576		hypothetical protein
YFR047C	-0.301614	0.430684	0.263317	0.389585		strong similarity to human quinolinate phosphoribosyltransferase
YFR048W	-0.42317	0.0977982	-0.138686	0.147503		similarity to hypothetical S.pombe protein SPAC12G12.14 and to YDL001w and YDR282c
YFR049W	-1.27288	0.000505242	0.434043	0.00732283	YMR31	mitochondrial ribosomal protein (precursor)
YFR050C	0.109881	0.713876	0.360929	0.0175728	PRE4	proteasome subunit necessary for peptidyl glutamyl peptide hydrolyzing activity
YFR051C	0.0568241	0.70337	0.220168	0.326127	RET2	vesicle coat component
YFR052W	0.107308	0.602596	-0.262306	0.0972679	RPN12	cytoplasmic 32 - 34 kDa protein
YFR053C	0.786167	0.583464	0.506591	0.116846	HXK1	Hexokinase I (PI) (also called Hexokinase A)
YFR054C	-0.644917	0.161876	0.0457072	0.687805		hypothetical protein
YFR055W	2.36318	0.33152	-0.223699	0.0774384		strong similarity to beta-cystathionases
YFR056C	1.34935	0.279096	-0.272204	0.217408		questionable ORF
YFR057W	0.0247478	0.97452	-0.246439	0.551526		weak similarity to Cha4p
YGL001C	0.866894	0.341823	0.188595	0.139111	ERG26	C-3 sterol dehydrogenase
YGL002W	-0.288572	0.149859	-0.0949704	0.0579734	ERP6	p24 protein involved in membrane trafficking
YGL003C	-0.514941	0.142259	0.0803404	0.422532	CDH1	protein required for Clb2 and Ase1 degradation
YGL004C	-0.298493	0.230423	-0.120827	0.158247		weak similarity to Tup1p
YGL005C	-1.36358	0.000203822	-0.763078	0.0116901		weak similarity to Xenopus kinesin-related protein Eg5
YGL006W	-1.08558	0.0283454	0.283309	0.114229	PMC1	putative vacuolar Ca2+ ATPase
YGL007W	-0.72962	0.0632189	-0.0851747	0.693596		questionable ORF
YGL008C	0.778074	0.536247	0.232985	0.237435	PMA1	plasma membrane H+-ATPase
YGL009C	-0.0750006	0.253927	0.0810784	0.127057	LEU1	isopropylmalate isomerase
YGL010W	-0.263374	0.470973	0.334822	0.070979		similarity to hypothetical S. pombe protein
YGL011C	0.0694638	0.82324	-0.0644147	0.191295	SCL1	Proteasome subunit YC7alpha /Y8 (protease yscE subunit 7)
YGL012W	1.70066	0.138632	0.478963	0.128713	ERG4	Sterol C-24 reductase
YGL013C	0.205049	0.493667	-0.0657592	0.213174	PDR1	zinc-finger transcription factor of the Zn(2)-Cys(6) binuclear cluster domain type
YGL014W	0.406013	0.342703	0	#DIV/0!		similarity to Drosophila pumilio protein and Mpt5p protein
YGL015C	0.619173	0.437358	0.0589852	0.818442		hypothetical protein
YGL017W	0.0460213	0.786287	0.0654975	0.300749	ATE1	arginyl-tRNA-protein transferase
YGL018C	0.343622	0.340375	0.0532656	0.5383	JAC1	member of the 20-kDa J-protein family of co-chaperones ; homolog of E. coli Hsc20 co-chaperone protein
YGL019W	0.0927172	0.378061	0.228733	0.24643	CKB1	beta (38kDa) subunit of casein kinase II (CKII)
YGL020C	0.295514	0.0595855	0.00915337	0.934165		hypothetical protein
YGL021W	0.868494	0.187871	-0.0715164	0.782574	ALK1	DNA damage-responsive protein
YGL023C	-0.561052	0.197226	-0.0596305	0.629633	PIB2	similar to Fab1 and Vps27 ; involved in telomere-proximal repression of gene expression
YGL025C	0.382226	0.187354	0.450902	0.0160702	PGD1	RNA polymerase II mediator subunit
YGL026C	-0.350646	0.00316749	0.158511	0.523537	TRP5	tryptophan synthetase
YGL027C	-0.26628	0.0531588	0.120102	0.472411	CWH41	glucosidase I
YGL028C	1.09099	0.372389	0.659627	0.084091	SCW11	soluble cell wall protein
YGL029W	1.35444	0.26834	-1.01815	0.0835325	CGR1	coiled-coil protein
YGL030W	2.17808	0.0276772	0.5126	0.0389837	RPL30	Large ribosomal subunit protein L30 (L32) (rp73) (YL38)
YGL031C	1.25446	0.0997721	-0.0567188	0.792607	RPL24A	Ribosomal protein L24A (rp29) (YL21) (L30A)
YGL032C	0.484284	0.16749	0.674204	0.0786926	AGA2	adhesion subunit of a-agglutinin
YGL033W	-0.0107165	0.961773	0.19546	0.438442	HOP2	Meiosis-specific gene required for the pairing of homologous chromosomes
YGL034C	-0.125511	0.759151	0.540595	0.322737		questionable ORF
YGL035C	0.706635	0.325976	0.282088	0.0019724	MIG1	C2H2 zinc finger protein which resembles the mammalian Egr and Wilms tumour proteins
YGL036W	0.0724665	0.634115	0.224386	0.0309487	MTC2	Mtf1 Two Hybrid Clone 2
YGL037C	-0.290335	0.463076	0.216389	0.106631	PNC1	pyrazinamidase and nicotinamidase
YGL038C	-0.96316	0.00698375	0.316838	0.190391	OCH1	membrane-bound alpha-1,6-mannosyltransferase
YGL039W	1.11041	0.110944	0.0406395	0.743017		similarity to V. vinifera dihydroflavonol reductase
YGL040C	-0.525826	0.0732018	-0.0273565	0.617585	HEM2	delta-aminolevulinate dehydratase (porphobilinogen synthase)
YGL041C	0.203118	0.544379	0.0786437	0.170671		weak similarity to YJL109c
YGL042C	-0.0252634	0.751772	-0.106998	0.616894		questionable ORF
YGL043W	0.240192	0.044658	-0.662871	0.100057	DST1	RNA polymerase II elongation factor
YGL044C	0.418146	0.0182686	-0.0987911	0.0359739	RNA15	component of the cleavage and polyadenylation factor CF I involved in pre-mRNA 3'-end processing
YGL045W	-0.310143	0.122707	-0.0251968	0.848194		hypothetical protein
YGL046W	-0.036903	0.90266	-0.287164	0.155841		hypothetical protein
YGL047W	-0.302484	0.239968	-0.130461	0.407979		similarity to hypothetical S. pombe protein
YGL048C	-0.160403	0.392995	-0.0222377	0.583337	RPT6	ATPase
YGL049C	0.432593	0.0741899	0.0190218	0.907487	TIF4632	TIF4632 encodes one of two homologs of eIF-4G, the 150 kD subunit of the mRNA cap-binding complex (eIF-4F)
YGL050W	0.549055	0.134104	-0.292803	0.173981		hypothetical protein
YGL051W	-0.748335	0.0642894	0.0836508	0.00320036		strong similarity to YAR033w protein
YGL052W	-0.308449	0.0948969	0.288725	0.272137		questionable ORF
YGL053W	-0.720485	0.033504	-0.0286763	0.852919	PRM8	pheromone-regulated membrane protein
YGL054C	0.517135	0.0877685	0.118292	0.0927617	ERV14	14 KDa protein found on ER-derived vesicles
YGL055W	-0.209133	0.706081	0.0495751	0.834894	OLE1	delta-9-fatty acid desaturase
YGL056C	-0.300305	0.452547	0.362388	0.0190164	SDS23	similar to S. pombe sds23
YGL057C	-0.2774	0.155291	-0.152632	0.0876925		hypothetical protein
YGL058W	0.422228	0.179048	-0.0963171	0.450715	RAD6	Ubiquitin conjugating (E2) enzyme. The C-terminal 23 residues are critical for sporulation and histone polyubiquitinating activity, but not UV repair or induced mutagenesis.
YGL059W	-0.584693	0.0576376	-0.560703	0.0428055		similarity to rat branched-chain alpha-ketoacid dehydrogenase kinase
YGL060W	-0.0592073	0.851614	-0.0703668	0.384826		strong similarity to hypothetical protein YBR216c
YGL061C	0.364182	0.579709	-0.111389	0.618439	DUO1	Death Upon Overexpression
YGL062W	-0.943687	0.0527103	0.224776	0.0791023	PYC1	pyruvate carboxylase
YGL063W	-0.0899532	0.908829	0.342892	0.11453	PUS2	pseudouridine synthase 2
YGL064C	0.966144	0.111063	-0.0710489	0.551265		similarity to YLR276c and YKR024c
YGL065C	0.153139	0.498783	0.19454	0.0445135	ALG2	glycosyltransferase
YGL066W	0.131246	0.396625	-0.382708	0.0475938		hypothetical protein
YGL067W	0.438928	0.195519	0.0944912	0.482651	NPY1	NADH pyrophosphatase 1
YGL068W	0.313979	0.43555	-0.0125547	0.794799		probable ribosomal protein L12
YGL069C	0.106483	0.703925	0.0544632	0.348117		questionable ORF
YGL070C	1.11685	0.189837	0.0527408	0.626672	RPB9	RNA polymerase II subunit
YGL072C	1.10357	0.125219	0.6356	0.106745		questionable ORF
YGL073W	1.25239	0.21914	0.332804	0.0312771	HSF1	heat shock transcription factor
YGL074C	-0.307181	0.347307	-0.12535	0.533443		questionable ORF
YGL075C	-0.684668	0.00697949	-0.296253	0.0798436	MPS2	nuclear envelope /ER protein involved in chromosomal segregation
YGL076C	0.85378	0.0508311	0.37489	0.0396027	RPL7A	Ribosomal protein L7A (L6A) (rp11) (YL8)
YGL077C	0.956323	0.375712	0.615804	0.11399	HNM1	Transporter (permease) for choline and nitrogen mustard ; share homology with UGA4
YGL078C	1.07489	0.0401587	-0.481602	0.0709845	DBP3	ATP-dependent RNA helicase CA3 of the DEAD /DEAH box family
YGL079W	0.00839752	0.906759	-0.0140023	0.880163		hypothetical protein
YGL080W	0.466002	0.137244	0.0514029	0.330873		strong similarity to C.elegans R07E5.13 protein
YGL081W	-0.994421	0.00539671	-0.319592	0.175927		hypothetical protein
YGL082W	-0.127341	0.575902	-0.192204	0.0475333		strong similarity to hypothetical protein YPL191c
YGL083W	0.124437	0.538383	0.066191	0.142477	SCY1	similar to bovine rhodopsin kinase ; suppressor of GTPase mutation
YGL084C	0.0901586	0.689052	0.515509	0.123471	GUP1	putative glycerol transporter
YGL085W	-0.282814	0.18484	-0.381843	0.00129326		weak similarity to Staphylococcus aureus nuclease (SNase)
YGL087C	0.251117	0.0980401	0.396693	0.118258	MMS2	Similar to ubiquitin conjugating protein family
YGL088W	0.707766	0.103384	1.15259	0.061444		questionable ORF
YGL089C	-0.345761	0.519926	-0.41591	0.333504	MF(ALPHA)2	alpha mating factor
YGL090W	-0.494508	0.464533	-0.465566	0.155929	LIF1	interacts with DNA ligase protein
YGL091C	0.160557	0.440579	0.0175279	0.663917	NBP35	35 kDa nucleotide binding protein
YGL092W	0.25541	0.609184	0.460172	0.0659196	NUP145	nuclear pore protein
YGL093W	0.132478	0.329267	-0.445587	0.12229	SPC105	component of spindle pole
YGL094C	0.503637	0.245053	0.108079	0.0253688	PAN2	135-kDa protein that is subunit of poly(A) ribonuclease
YGL095C	-0.0824941	0.45188	-0.404321	0.0418757	VPS45	cytosolic and peripheral membrane protein
YGL097W	0.632716	0.226988	-0.173171	0.310555	SRM1	pheromone response pathway suppressor
YGL098W	-0.0833234	0.358182	-0.760737	0.0214889		hypothetical protein
YGL099W	0.700725	0.13353	-0.302833	0.254891		similarity to putative human GTP-binding protein MMR1
YGL100W	0.243862	0.526233	-0.0123511	0.930515	SEH1	nuclear pore protein
YGL101W	0.675243	0.375046	-0.414128	0.0596437		strong similarity to hypothetical protein YBR242w
YGL102C	1.38458	0.0821276	0.248643	0.11224		questionable ORF
YGL103W	2.02932	0.0977688	0.135393	0.213072	RPL28	Ribosomal protein L28 (L29) (rp44) (YL24)
YGL104C	-0.652935	0.00267088	-0.0568596	0.514253		similarity to glucose transport proteins
YGL105W	0.37977	0.352276	0.204118	0.0899061	ARC1	G4 nucleic acid binding protein, involved in tRNA aminoacylation
YGL106W	0.325016	0.346889	-0.182859	0.203631	MLC1	light chain for myosin Myo2p
YGL107C	0.500453	0.16949	-0.385622	0.0142996		strong similarity to hypothetical protein YBR238c
YGL108C	-0.189496	0.270587	-0.343513	0.24416		weak similarity to hypotetical S.pombe protein
YGL109W	0.282506	0.472402	-0.114677	0.657937		questionable ORF
YGL110C	0.169078	0.613155	-0.257667	0.0346889		hypothetical protein
YGL111W	0.789659	0.000572338	-0.404699	0.0734555		hypothetical protein
YGL112C	-0.189033	0.324603	-0.0700047	0.648056	TAF60	TATA-binding protein-associated-factor
YGL113W	0.104623	0.735028	-0.277632	0.0601391		weak similarity to YOR165w
YGL114W	-0.498563	0.110879	0.121706	0.138576		weak similarity to H.influenzae permease
YGL115W	-0.0933483	0.480114	-0.259706	0.0524515	SNF4	associates with Snf1p
YGL116W	0.363137	0.190192	-0.153203	0.621491	CDC20	anaphase promoting complex subunit
YGL117W	0.131149	0.730805	-0.718974	0.0398955		hypothetical protein
YGL118C	-0.451145	0.377711	0.0203453	0.42265		questionable ORF
YGL119W	-0.106901	0.653821	-0.197466	0.0110426	ABC1	ubiquinol-cytochrome-c reductase assembly protein
YGL120C	1.85925	0.245463	0.0978876	0.217476	PRP43	RNA helicase
YGL121C	-0.956902	0.0988329	-0.0933099	0.776175		hypothetical protein
YGL122C	-0.138961	0.374076	-0.324686	0.50247	NAB2	nuclear polyadenylated RNA binding protein
YGL123W	1.47581	0.176326	0.298163	0.176787	RPS2	Ribosomal protein S2 (S4) (rp12) (YS5)
YGL124C	-0.133296	0.445544	-0.160678	0.119342	MON1	hypothetical protein
YGL125W	-0.925457	0.0334219	0.419973	0.00772102	MET13	putative methylenetetrahydrofolate reductase (mthfr)
YGL126W	0.0636143	0.866948	0.343349	0.322902	SCS3	involved in inositol biosynthesis
YGL127C	0.87593	0.0674946	0.603774	0.0329638	SOH1	SOH1 encodes a novel 14-kD protein with limited sequence similarity to RNA polymerases. The Soh1 protein interacts with a DNA repair protein, Rad5p, in a two-hybrid system assay.
YGL128C	-0.172594	0.571613	0.513061	0.135789		putative heat shock protein protein
YGL129C	0.754404	0.160307	-0.202149	0.0309189	RSM23	protein of the small subunit of the mitochondrial ribosome
YGL130W	-0.0513731	0.835023	0.136659	0.150155	CEG1	mRNA guanylyltransferase (mRNA capping enzyme), alpha subunit
YGL131C	0.23321	0.374967	-0.13617	0.368305		weak similarity to S.pombe hypothetical protein C3H1.12C
YGL132W	-0.0866144	0.3492	0.437995	0.127782		questionable ORF
YGL133W	0.267649	0.0696628	0.617391	0.0854793	ITC1	A subunit of Isw2 chromatin remodeling complex
YGL134W	-0.0444423	0.86408	-0.246243	0.233975	PCL10	PHO85 cyclin
YGL135W	1.59598	0.00823074	0.465603	0.0179863	RPL1B	Ribosomal protein L1B
YGL136C	-0.66747	0.0202257	0.0256739	0.657835		weak similarity to E.coli ftsJ protein
YGL137W	-0.0397445	0.811896	0.075363	0.580767	SEC27	encodes beta'-subunit of yeast coatomer
YGL138C	0.372988	0.605297	0	#DIV/0!		hypothetical protein
YGL139W	-0.145161	0.214494	0.302386	0.141467		strong similarity to hypothetical protein YPL221w
YGL141W	-0.292575	0.349307	-0.0104552	0.857797	HUL5	ubiquitin-protein ligase (E3)
YGL142C	-0.0996799	0.744737	0.223435	0.287558	GPI10	Protein involved in Glycosyl Phosphatidyl Inositol synthesis ; could be the target of the GPI synthesis inhibitor, YW3548 ; Most likely an alpha 1,2 mannosyltransferase utilized for the addition of the third mannose onto the GPI core structure.
YGL143C	-0.0243199	0.914977	-0.0897713	0.237039	MRF1	Mitochondrial polypeptide chain release factor
YGL144C	-0.241528	0.204038	-0.384396	0.00191789		lipase motif protein
YGL145W	0.277766	0.279651	-0.470795	0.0261735	TIP20	transport protein that interacts with Sec20p ; required for protein transport from the endoplasmic reticulum to the golgi apparatus
YGL146C	-1.17812	0.0247854	-0.182463	0.249289
YGL147C	2.00115	0.0338626	0.0582067	0.78016	RPL9A	Ribosomal protein L9A (L8A) (rp24) (YL11)
YGL148W	0.448194	0.376741	0.195972	0.235834	ARO2	Chorismate synthase
YGL149W	0.382276	0.256706	0.078272	0.598124		questionable ORF
YGL150C	-0.28872	0.509507	-0.315093	0.0163335	INO80	similar to the Snf2p family of DNA-dependent ATPases
YGL151W	0.453858	0.054071	0.222918	0.188577	NUT1	negative regulator of HO endonuclease
YGL152C	0.0233069	0.93067	-0.408467	0.0265565		questionable ORF
YGL153W	-0.165268	0.540064	-0.469806	0.0450289	PEX14	component of peroxisomal import machinery
YGL154C	-0.0141147	0.928333	0.0529918	0.10365	LYS5	aminoadipate-semialdehyde dehydrogenase small subunit (alpha-aminoadipate reductase)
YGL155W	0.300539	0.309032	0.04551	0.146922	CDC43	polypeptide subunit of a yeast type 1 protein geranylgeranyltransferase
YGL156W	-2.31282	0.000181206	0.142521	0.588892	AMS1	vacuolar alpha mannosidase
YGL157W	2.90742	0.394227	0.0438151	0.573305		similarity to V.vinifera dihydroflavonol 4-reductase
YGL158W	0.205863	0.632327	-0.387416	0.293363	RCK1	Serine /threonine protein kinase
YGL159W	-0.408041	0.0950563	-0.638616	0.0104986		hypothetical protein
YGL160W	0.168518	0.171445	0.436463	0.101242		similarity to hypothetical protein YLR047c and Fre2p
YGL161C	-0.268229	0.256713	0.424039	0.102681		hypothetical protein
YGL162W	1.05492	0.238637	0.25781	0.202059	SUT1	hypoxic gene family involved in sterol transport
YGL163C	-0.0550967	0.861743	-0.265857	0.0984051	RAD54	DNA-dependent ATPase
YGL164C	-0.283572	0.114066	-0.671139	0.0443788		similarity to S.pombe hypothetical protein SPAC31A2.10
YGL165C	0.114872	0.817771	0.190258	0.260312		questionable ORF
YGL166W	0.161381	0.833718	0.0838485	0.430814	CUP2	Activator of transcription
YGL167C	-0.0183856	0.946968	0.431733	0.0795017	PMR1	Ca++-Pump, ATPase
YGL168W	0.230472	0.159267	0.834713	0.101909		questionable ORF
YGL169W	0.613083	0.0176294	-0.180118	0.000409411	SUA5	translation initiation protein
YGL170C	0.514103	0.251372	0.365988	0.0570827		hypothetical protein
YGL171W	0.953425	0.188663	-0.478426	0.153503	ROK1	RNA helicase involved in rRNA processing
YGL172W	-0.127548	0.352385	-0.0522818	0.534161	NUP49	nuclear pore complex protein with GLFG repetitive sequence motif
YGL173C	-0.437208	0.18897	0.342232	0.116317	KEM1	cytoplasmic 5'-to-3' exonuclease.
YGL174W	-0.207693	0.284462	-0.365358	0.0462479		weak similarity to C.elegans hypothetical protein R08D7.1
YGL175C	0.138512	0.633758	-0.133917	0.62178	SAE2	involved in meiotic recombination
YGL176C	-0.469614	0.0272777	-0.322067	0.0751644		weak similarity to Oryctolagus calcium channel BIII
YGL177W	-0.05427	0.742877	0.940842	0.0322514		questionable ORF
YGL178W	0.459762	0.247683	0.478231	0.146016	MPT5	multicopy suppressor of POP2
YGL179C	0.00729222	0.989782	-0.00189879	0.978483	TOS3	strong similarity to Pak1p, Elm1p and Kin82p
YGL180W	-0.851483	0.0511606	-0.102695	0.140158	APG1	Protein kinase
YGL181W	-0.0907521	0.630931	-0.170865	0.00228744	GTS1	Glycine-threonine-serine repeat protein
YGL182C	0.540675	0.603128	-0.231761	0.42265		questionable ORF
YGL183C	-0.207283	0.641737	0.050083	0.677599		hypothetical protein
YGL184C	-0.433138	0.321915	-0.0368111	0.677227	STR3	Cystathionine beta-lyase
YGL185C	-0.66868	0.0101099	-0.351887	0.0770074		weak similarity to dehydrogenases
YGL186C	0.393513	0.264913	0.16651	0.395624		similarity to hypothetical protein Fcy21p and weak similarity to FCY2 protein
YGL187C	-2.12848	0.000904118	-0.0410842	0.726325	COX4	subunit IV of cytochrome c oxidase
[truncated: 3,919 more rows]
